# Supplementary material
Source: publisher site journal article supplement (https://www.spandidos-publications.com/7603/downloadSupplementary)
Supplement: Supplementary file 1 [file downloadSupplementary]

## Sheet: Sheet1
Table SIII. Differentially expressed genes.
baseMean	log2FoldChange	lfcSE	stat	pvalue	padj	State	symbol	ENTREZID
828.162	4.87934	0.117746	41.4395	0	0	UP	HS3ST1	9957
1606.1	7.84288	0.162649	48.2197	0	0	UP	AOC1	26
1185.03	-2.98524	0.067593	-44.1649	0	0	DOWN	SARM1	23098
1217.15	2.41521	0.0604116	39.9793	0	0	UP	SKAP2	8935
1183.36	-1.29959	0.0337553	-38.5004	0	0	NONE	DNAJC11	55735
838.274	-2.81597	0.0737927	-38.1605	0	0	DOWN	CDK11A	728642
4156.74	-8.67742	0.090787	-95.58	0	0	DOWN	NME2	4831
1947.2	4.47236	0.108053	41.3905	0	0	UP	PLAUR	5329
9960.24	5.60495	0.13509	41.4906	0	0	UP	GPRC5A	9052
363.249	-10.8652	0.16389	-66.2958	0	0	DOWN	RGPD5	84220
1421.94	5.97	0.154208	38.7139	0	0	UP	VSIG2	23584
10988.1	5.95831	0.131358	45.3595	0	0	UP	LAMC2	3918
185.951	5.71927	0.140589	40.6807	0	0	UP	STYK1	55359
491.927	4.12877	0.108943	37.8984	0	0	UP	GNA15	2769
2848.27	7.23515	0.185128	39.0818	0	0	UP	COL11A1	1301
1682.45	5.6243	0.124626	45.1295	0	0	UP	CDH3	1001
4362.92	8.56623	0.177613	48.2297	0	0	UP	COL17A1	1308
24662.8	2.80914	0.0728071	38.5833	0	0	UP	PKM	5315
132.33	4.12281	0.103478	39.8423	0	0	UP	PRR11	55771
472.121	6.4406	0.164086	39.2514	0	0	UP	PITX1	5307
241.5	4.43676	0.117242	37.8427	0	0	UP	DAPP1	27071
928.752	6.76772	0.168074	40.2664	0	0	UP	CDHR2	54825
1438.13	4.70937	0.109439	43.0319	0	0	UP	SEMA3C	10512
971.558	3.44822	0.0912724	37.7795	0	0	UP	CELSR1	9620
142.869	4.22188	0.108294	38.9854	0	0	UP	UBE2T	29089
5274	-3.40212	0.0779604	-43.639	0	0	DOWN	MKNK1	8569
1302.1	4.29258	0.106511	40.3019	0	0	UP	CEACAM1	634
19547.6	7.13898	0.157357	45.368	0	0	UP	CEACAM6	4680
757.055	-2.74327	0.0494471	-55.479	0	0	DOWN	ALG9	79796
3648.88	3.92739	0.10055	39.0589	0	0	UP	FXYD5	53827
2782.96	7.69315	0.190721	40.3372	0	0	UP	GABRP	2568
2337.64	6.64233	0.132524	50.1216	0	0	UP	MISP	126353
8846.59	7.80888	0.151252	51.6282	0	0	UP	MMP11	4320
456.283	-6.01301	0.0692432	-86.8391	0	0	DOWN	TOP3B	8940
284.434	-6.17923	0.0813831	-75.9277	0	0	DOWN	POLR2F	5435
26.2647	-8.92051	0.201086	-44.3617	0	0	DOWN	SOX10	6663
22807.1	-18.6782	0.185391	-100.75	0	0	DOWN	XBP1	7494
4041.68	-4.25512	0.110896	-38.3705	0	0	DOWN	TIMP3	7078
1006.13	-3.65447	0.0770165	-47.4505	0	0	DOWN	CHKB	1120
1247.23	-3.19475	0.0516884	-61.8079	0	0	DOWN	MTMR3	8897
5951.19	4.52171	0.100549	44.9701	0	0	UP	APOL1	8542
1136.74	-3.28825	0.0646883	-50.8322	0	0	DOWN	SDR39U1	56948
1278.69	-3.24691	0.0573087	-56.6565	0	0	DOWN	TM9SF1	10548
899.893	6.35842	0.156932	40.5171	0	0	UP	MMP9	4318
5104.88	8.46566	0.20747	40.8042	0	0	UP	MSLN	10232
590.176	-2.53197	0.0542169	-46.7008	0	0	DOWN	ARL2BP	23568
860.477	-2.06788	0.0540098	-38.2871	0	0	DOWN	SETD6	79918
438.252	-2.39249	0.0454726	-52.6138	0	0	DOWN	SLC7A6OS	84138
1946.16	-5.18373	0.113871	-45.5229	0	0	DOWN	NOMO3	408050
1207.56	5.8333	0.137094	42.5498	0	0	UP	CEMIP	57214
1719.76	6.26343	0.142912	43.8273	0	0	UP	KCNN4	3783
1240.98	-2.50279	0.062784	-39.8635	0	0	DOWN	ARHGEF18	23370
12786.8	10.2299	0.23902	42.7993	0	0	UP	CEACAM5	1048
746.411	-5.49708	0.0782594	-70.2418	0	0	DOWN	PIK3R2	5296
844.639	-5.73362	0.102855	-55.7448	0	0	DOWN	RASA4	10156
200.101	6.76423	0.165427	40.8894	0	0	UP	WNT2	7472
3085.4	2.83758	0.0750048	37.8319	0	0	UP	AHR	196
1039.88	5.27075	0.110868	47.5408	0	0	UP	CORO2A	7464
13400.3	2.92672	0.0741701	39.4595	0	0	UP	LGALS3BP	3959
122197	5.33427	0.135161	39.466	0	0	UP	COL1A1	1277
1525.12	-2.33554	0.062228	-37.5319	0	0	DOWN	DPH1	1801
328.465	-4.29805	0.0648849	-66.2412	0	0	DOWN	SNX15	29907
3831.41	3.82605	0.0987847	38.7312	0	0	UP	MDK	4192
474.016	-4.21503	0.0658001	-64.0582	0	0	DOWN	OGFOD2	79676
873.957	2.91143	0.073724	39.4909	0	0	UP	VDR	7421
1459.76	-2.43978	0.0628651	-38.8098	0	0	DOWN	LPCAT3	10162
1326.24	-3.12269	0.0634635	-49.2045	0	0	DOWN	PHC1	1911
100.012	-2.99336	0.0784007	-38.1802	0	0	DOWN	B3GAT2	135152
45963.7	3.9938	0.0980428	40.7352	0	0	UP	SPARC	6678
3957.66	3.95618	0.0959908	41.2141	0	0	UP	DPYSL3	1809
959.952	-2.74527	0.0651343	-42.1478	0	0	DOWN	NPHP3	27031
7027.41	1.87769	0.0462327	40.6139	0	0	NONE	GNAI2	2771
480.8	-2.91144	0.0734638	-39.6309	0	0	DOWN	INO80B	83444
2204.85	3.70425	0.0886787	41.7715	0	0	UP	FHL2	2274
317.265	4.41258	0.112056	39.3784	0	0	UP	KYNU	8942
434.236	-2.8331	0.0619863	-45.7053	0	0	DOWN	GPR89A	653519
4884.56	4.84684	0.11707	41.4013	0	0	UP	SLC2A1	6513
4683.56	5.99916	0.115503	51.9392	0	0	UP	TSPAN1	10103
1652.51	3.98614	0.09051	44.0409	0	0	UP	NRP2	8828
526.004	-4.02617	0.0459306	-87.6578	0	0	DOWN	ZNF410	57862
396.421	-5.5458	0.0790043	-70.1962	0	0	DOWN	SEC16B	89866
310.877	-1.84792	0.0469803	-39.3339	0	0	NONE	RWDD3	25950
1779.5	6.21638	0.144483	43.0251	0	0	UP	INHBA	3624
730.715	-2.60771	0.0616888	-42.272	0	0	DOWN	CCZ1	51622
2872.77	8.04632	0.179006	44.9501	0	0	UP	COL10A1	1300
234.479	4.09267	0.0917057	44.6283	0	0	UP	PRICKLE4	29964
1585.94	2.91363	0.0752827	38.7025	0	0	UP	EFNB2	1948
9373.38	7.8754	0.177536	44.3595	0	0	UP	KRT17	3872
37.7438	5.21913	0.135502	38.5171	0	0	UP	OPN1SW	611
1767.56	7.19098	0.176774	40.6789	0	0	UP	KLK10	5655
13083.1	4.35879	0.115014	37.8979	0	0	UP	COL5A1	1289
532.634	-3.70974	0.064293	-57.7006	0	0	DOWN	ZNF337	26152
2075.45	-4.61905	0.058441	-79.0378	0	0	DOWN	ANKHD1	54882
2494.15	3.96723	0.0940319	42.1902	0	0	UP	ANO1	55107
1607.43	8.17254	0.179061	45.6412	0	0	UP	TNS4	84951
630.409	5.63416	0.140641	40.0606	0	0	UP	MATN3	4148
443.556	-9.80164	0.116963	-83.8014	0	0	DOWN	SLX1A	548593
665.819	-3.75209	0.0627507	-59.7935	0	0	DOWN	SCLY	51540
929.716	-3.9796	0.0724475	-54.9308	0	0	DOWN	GPS2	2874
7322.78	6.53044	0.13703	47.6571	0	0	UP	POSTN	10631
476.783	5.47378	0.144057	37.9974	0	0	UP	OASL	8638
1380.09	-7.13601	0.124541	-57.2986	0	0	DOWN	GLS2	27165
36.7512	-4.49016	0.0839232	-53.5032	0	0	DOWN	ZNF670	93474
212.188	6.36368	0.167079	38.0878	0	0	UP	WNT10A	80326
426.402	-3.08563	0.0725592	-42.5256	0	0	DOWN	ANKRD36	375248
356.688	-5.29635	0.075667	-69.9955	0	0	DOWN	CIDEB	27141
884.399	7.33207	0.178267	41.1298	0	0	UP	GALNT5	11227
880.062	5.26526	0.130927	40.2151	0	0	UP	IL1RN	3557
363.991	-3.88011	0.0847403	-45.7883	0	0	DOWN	SLC31A2	1318
246.295	4.9846	0.124166	40.1448	0	0	UP	TFAP2A	7020
7165.5	5.69682	0.123663	46.0672	0	0	UP	SULF1	23213
3919.66	8.8266	0.200732	43.9721	0	0	UP	TMPRSS4	56649
1011.08	5.03075	0.116125	43.3219	0	0	UP	SEMA7A	8482
386.741	4.65479	0.116314	40.0191	0	0	UP	LEF1	51176
2062.94	-2.47313	0.0645454	-38.3162	0	0	DOWN	WDFY2	115825
123.924	-7.98943	0.119184	-67.0347	0	0	DOWN	CELF6	60677
271.244	-2.3321	0.0619963	-37.6167	0	0	DOWN	GCSH	2653
2312.48	4.18093	0.11097	37.6764	0	0	UP	CDH11	1009
213.855	-3.10068	0.0514076	-60.3156	0	0	DOWN	ZSCAN32	54925
32150.7	-10.416	0.226507	-45.9852	0	0	DOWN	CTRL	1506
3028.64	4.35519	0.113712	38.3003	0	0	UP	SLC16A3	9123
1204.34	3.69125	0.0887257	41.6029	0	0	UP	MBOAT2	129642
603.381	2.93178	0.0715446	40.9784	0	0	UP	OSBPL10	114884
2300.48	5.24228	0.127381	41.1544	0	0	UP	COL8A1	1295
780.54	5.97734	0.136403	43.8211	0	0	UP	PLAC8	51316
760.342	-4.57425	0.0661833	-69.1149	0	0	DOWN	PYURF	100996939
8754.24	4.66712	0.109065	42.7923	0	0	UP	IGFBP3	3486
1251.9	3.02572	0.0633372	47.7716	0	0	UP	SH3KBP1	30011
26.1499	-3.16497	0.0837334	-37.7981	0	0	DOWN	SPIN2A	54466
1361.86	5.35522	0.119638	44.7618	0	0	UP	IL2RG	3561
777.617	-3.67091	0.0906167	-40.5103	0	0	DOWN	ADHFE1	137872
278.098	-12.1702	0.181364	-67.104	0	0	DOWN	ADIRF	10974
270.974	-7.60496	0.0829208	-91.7135	0	0	DOWN	C11orf52	91894
40.5934	-3.92955	0.0927487	-42.3677	0	0	DOWN	CNBD2	140894
1049.13	-6.65416	0.0960127	-69.305	0	0	DOWN	MIA2	4253
17519.1	-3.50063	0.0849647	-41.2009	0	0	DOWN	PDCD4	27250
856.433	4.36812	0.115828	37.7122	0	0	UP	ADAMTS12	81792
781.275	4.81299	0.121136	39.7322	0	0	UP	TMEM45B	120224
731.675	-3.14534	0.0621127	-50.6392	0	0	DOWN	RABGEF1	27342
251.437	4.75712	0.121777	39.0642	0	0	UP	BATF	10538
215.131	4.54386	0.113671	39.9739	0	0	UP	RHBDL2	54933
401.705	-3.60347	0.0755043	-47.7254	0	0	DOWN	CCDC117	150275
3681.36	-8.83899	0.159869	-55.2889	0	0	DOWN	CBS	875
1310.76	-6.35119	0.117536	-54.036	0	0	DOWN	U2AF1	7307
624.168	-2.26918	0.0497539	-45.608	0	0	DOWN	LSM12	124801
7073.4	-5.95987	0.0872079	-68.3409	0	0	DOWN	EIF4A1	1973
1704.34	-5.63133	0.0898399	-62.6818	0	0	DOWN	SPSB3	90864
565.713	-2.16306	0.0488682	-44.2631	0	0	DOWN	ZFPL1	7542
2515.51	3.48867	0.0861354	40.5021	0	0	UP	CAMK2N1	55450
1296.5	4.91871	0.121471	40.4927	0	0	UP	OLFML2B	25903
1223.7	-5.32514	0.0644774	-82.5892	0	0	DOWN	NBPF8	728841
772.716	4.3537	0.104482	41.6693	0	0	UP	KIF26B	55083
327.739	-3.14465	0.0452411	-69.5088	0	0	DOWN	MEMO1	7795
4350.2	8.29254	0.212707	38.9858	0	0	UP	S100P	6286
120.575	-6.34114	0.0688288	-92.1291	0	0	DOWN	ATRIP	84126
2208.93	4.34012	0.096052	45.1851	0	0	UP	ITGA2	3673
242.867	4.20524	0.109116	38.5392	0	0	UP	PTTG1	9232
81774.7	5.0309	0.122334	41.1244	0	0	UP	COL1A2	1278
11.7517	-7.74931	0.196932	-39.3502	0	0	DOWN	PGAM2	5224
1903.01	5.36052	0.138211	38.7851	0	0	UP	CTHRC1	115908
1341.52	5.2212	0.136261	38.3176	0	0	UP	GJB2	2706
6014.46	5.13931	0.119862	42.8768	0	0	UP	IFI27	3429
2226.55	-3.25435	0.0602878	-53.9802	0	0	DOWN	ILK	3611
526.776	-3.93802	0.047979	-82.078	0	0	DOWN	NDST2	8509
13.4565	-5.75559	0.139653	-41.2134	0	0	DOWN	CCDC103	388389
269.59	-3.81282	0.0675992	-56.4034	0	0	DOWN	ZNF23	7571
1420.73	6.39341	0.1662	38.4683	0	0	UP	CYP2S1	29785
1781.9	6.50938	0.142042	45.8273	0	0	UP	C19orf33	64073
1046.33	9.97878	0.243697	40.9474	0	0	UP	KLK6	5653
218.734	-9.58121	0.122625	-78.1344	0	0	DOWN	NDUFA7	4701
729.68	-4.26383	0.0766475	-55.6291	0	0	DOWN	POLR2J3	548644
735.004	-3.71539	0.0879524	-42.2431	0	0	DOWN	MGAT2	4247
292.104	4.85614	0.129391	37.5309	0	0	UP	MFSD2A	84879
89121.1	5.0548	0.127036	39.7904	0	0	UP	COL3A1	1281
1081.39	-3.94526	0.0846083	-46.6297	0	0	DOWN	JMJD7-PLA2G4B	8681
974.775	8.81158	0.217246	40.5603	0	0	UP	KLK7	5650
792.354	-5.45972	0.09193	-59.3899	0	0	DOWN	NPIPB3	23117
119.117	-3.54907	0.088876	-39.9328	0	0	DOWN	BOLA2B	654483
180.668	-3.68315	0.0747138	-49.2968	0	0	DOWN	RGPD8	727851
544.237	-3.74179	0.0637505	-58.6942	0	0	DOWN	SPNS1	83985
788.511	5.05516	0.118446	42.6788	0	0	UP	PCDH7	5099
285.187	4.00883	0.104509	38.3586	0	0	UP	TMEM154	201799
5098.27	-2.39799	0.0579916	-41.3507	0	0	DOWN	GABARAP	11337
890.882	10.495	0.255888	41.014	0	0	UP	CST1	1469
910.452	3.45826	0.0843148	41.016	0	0	UP	EMB	133418
384.206	-7.63477	0.122503	-62.3232	0	0	DOWN	RASA4B	100271927
591.55	6.68147	0.157208	42.5009	0	0	UP	SDR16C5	195814
21.5908	-5.6248	0.124294	-45.2539	0	0	DOWN	HSFX1	100506164
26013.2	5.23288	0.12445	42.0482	0	0	UP	KRT19	3880
523.939	7.74301	0.194002	39.912	0	0	UP	LRRC15	131578
432.75	-2.83917	0.0593546	-47.834	0	0	DOWN	SMN1	6606
370.481	-6.46283	0.0830268	-77.8403	0	0	DOWN	AGAP5	729092
1484.83	-2.89293	0.0479226	-60.3668	0	0	DOWN	RBM4	5936
897.092	-3.54931	0.0562651	-63.0818	0	0	DOWN	GTF2IRD2B	389524
663.769	-4.15789	0.0364896	-113.947	0	0	DOWN	BBS1	582
2468.37	6.47275	0.151325	42.7739	0	0	UP	SFN	2810
470.805	6.624	0.150441	44.0306	0	0	UP	FOXL1	2300
1261.97	-3.2636	0.0811823	-40.201	0	0	DOWN	SIX5	147912
686.978	-3.01075	0.0489901	-61.4564	0	0	DOWN	WDR73	84942
657.542	-2.56174	0.0611276	-41.908	0	0	DOWN	C18orf32	497661
1041	-2.35558	0.0533922	-44.1185	0	0	DOWN	FAM219B	57184
149.828	-5.57162	0.110878	-50.2501	0	0	DOWN	TRIM73	375593
1649.9	-3.18009	0.0682567	-46.5901	0	0	DOWN	HYI	81888
415.018	-11.358	0.166198	-68.3401	0	0	DOWN	FAM156B	727866
187.088	4.28292	0.110151	38.8821	0	0	UP	SHISA2	387914
3644.28	4.87591	0.108051	45.1259	0	0	UP	NQO1	1728
388.906	-4.7991	0.0766206	-62.6346	0	0	DOWN	TRAPPC5	126003
365.365	-2.28858	0.0536524	-42.6556	0	0	DOWN	ZNF322	79692
99.104	-7.21996	0.142905	-50.5229	0	0	DOWN	SLX1B	79008
519.843	-2.51128	0.0519494	-48.3409	0	0	DOWN	DEXI	28955
2340.23	-6.05765	0.0797808	-75.9286	0	0	DOWN	ARL6IP4	51329
444.786	-4.23343	0.065287	-64.8434	0	0	DOWN	CYB5D1	124637
132.021	-11.244	0.167478	-67.1371	0	0	DOWN	CMC4	100272147
1527.55	-12.688	0.14019	-90.5055	0	0	DOWN	RGPD6	729540
52.5259	-4.55163	0.103255	-44.0813	0	0	DOWN	PLGLB1	5343
52.0819	-9.90253	0.169368	-58.4675	0	0	DOWN	BOLA2	552900
2090.3	-5.3919	0.0777965	-69.3077	0	0	DOWN	NPIPA1	9284
323.345	-3.38494	0.0533835	-63.408	0	0	DOWN	GTF2H2C	728340
236.965	-6.61704	0.0857162	-77.1971	0	0	DOWN	ZNRF3	84133
231.358	-12.0555	0.16867	-71.4736	0	0	DOWN	KREMEN1	83999
64.1822	-4.04635	0.0905069	-44.7077	0	0	DOWN	TUBA8	51807
510.13	-1.94181	0.0494146	-39.2963	0	0	NONE	DIABLO	56616
6130.18	-6.1209	0.0693835	-88.2184	0	0	DOWN	EIF3C	8663
253.531	-6.94663	0.0990387	-70.1406	0	0	DOWN	GOLGA6L4	643707
492.946	3.99452	0.103001	38.7812	0	0	UP	EFNA5	1946
10.9172	-7.09299	0.183345	-38.6867	0	0	DOWN	SERINC4	619189
37.7423	-6.45787	0.150372	-42.9461	0	0	DOWN	DMRTC1B	728656
5393.79	-5.04066	0.0833228	-60.4956	0	0	DOWN	NOMO2	283820
2759.68	4.68448	0.123336	37.9814	0	0	UP	AHNAK2	113146
35.4521	-5.99539	0.158071	-37.9284	0	0	DOWN	NPAP1	23742
381.105	-5.28895	0.0787034	-67.201	0	0	DOWN	ARL17A	51326
384.116	-3.76151	0.0894432	-42.0547	0	0	DOWN	NPIPB4	440345
1456.7	-3.04292	0.0667519	-45.5856	0	0	DOWN	RNPC3	55599
113.844	-4.45739	0.084843	-52.537	0	0	DOWN	GOLGA8R	101059918
1454.68	7.56782	0.197351	38.3471	0	0	UP	KRT16	3868
352.94	-6.03855	0.0854901	-70.6345	0	0	DOWN	ZACN	353174
147.041	-5.89383	0.0827034	-71.2647	0	0	DOWN	PTRH1	138428
336.662	-10.8931	0.17304	-62.9512	0	0	DOWN	MAGED4B	81557
174.8	-3.87304	0.0631198	-61.3601	0	0	DOWN	NHEJ1	79840
448.166	-3.08842	0.0691474	-44.6642	0	0	DOWN	GPR89B	51463
368.88	-3.71077	0.0717304	-51.7323	0	0	DOWN	AGAP4	119016
47.3021	-7.1718	0.136512	-52.5362	0	0	DOWN	ZNF177	7730
5301.97	3.57343	0.0929792	38.4326	0	0	UP	S100A16	140576
1236.31	-2.42714	0.0620599	-39.1097	0	0	DOWN	TMEM120B	144404
281.437	-3.32177	0.0578004	-57.4697	0	0	DOWN	RBM34	23029
686.51	6.74859	0.142729	47.2824	0	0	UP	GJB3	2707
7846.6	4.09528	0.10643	38.4785	0	0	UP	HLA-DRB1	3123
25242.5	-7.5988	0.180168	-42.1762	0	0	DOWN	SERPINA3	12
11866.5	7.21546	0.178642	40.3905	0	0	UP	CTSE	1510
534.915	-3.33876	0.0646853	-51.6154	0	0	DOWN	GTF2IRD2	84163
1264.49	-3.97834	0.0727119	-54.7138	0	0	DOWN	IPO4	79711
3811.96	3.51627	0.0846677	41.5302	0	0	UP	SULF2	55959
321.817	4.40825	0.0971678	45.3674	0	0	UP	HRH1	3269
95.2759	-5.2217	0.137409	-38.001	0	0	DOWN	TRPV1	7442
47.1662	-9.45963	0.168751	-56.0568	0	0	DOWN	ZNF709	163051
9371.4	5.94739	0.13002	45.742	0	0	UP	LAMB3	3914
351.708	-3.8969	0.0755971	-51.5483	0	0	DOWN	ANKRD36B	57730
25.9384	-6.04195	0.146172	-41.3344	0	0	DOWN	NPIPB9	100507607
2384.64	3.98236	0.0989681	40.2388	0	0	UP	ACSL5	51703
485.319	-2.93624	0.0629215	-46.6651	0	0	DOWN	SHPK	23729
231.014	-3.90059	0.0829902	-47.0005	0	0	DOWN	CCDC180	100499483
38199.1	5.3842	0.106007	50.7911	0	0	UP	S100A6	6277
605.811	-3.81866	0.0824091	-46.3378	0	0	DOWN	GOLGA6L9	440295
7.67211	-7.03013	0.185702	-37.8571	0	0	DOWN	PCDH20	64881
50.1771	-7.88719	0.205933	-38.2998	0	0	DOWN	TUBB3	10381
1232.53	4.27621	0.101284	42.2201	0	0	UP	CARD11	84433
9430.84	-2.91057	0.0771902	-37.7065	0	0	DOWN	DDX39B	7919
911.806	-2.02543	0.05168	-39.1918	0	0	DOWN	FAN1	22909
656.225	-2.68687	0.0536395	-50.0913	0	0	DOWN	COX20	116228
1515.46	-6.70389	0.148358	-45.1872	0	0	DOWN	RBM20	282996
887.341	-2.96676	0.0760437	-39.0139	0	0	DOWN	AGAP6	414189
177.872	-5.57237	0.109449	-50.9131	0	0	DOWN	SYT15	83849
8519.06	4.43684	0.108162	41.0205	0	0	UP	COL5A2	1290
941.506	-3.08547	0.0764398	-40.3647	0	0	DOWN	MRPL38	64978
748.39	-2.74807	0.0530276	-51.8235	0	0	DOWN	ABHD16A	7920
610.518	6.62713	0.164024	40.4034	0	0	UP	TRIM31	11074
445.262	-3.5183	0.0610008	-57.6763	0	0	DOWN	MRPL53	116540
390.373	-3.48358	0.0569853	-61.1312	0	0	DOWN	SARNP	84324
237.151	-5.1723	0.0688425	-75.1324	0	0	DOWN	SERF1B	728492
1847.69	-9.40774	0.084754	-111	0	0	DOWN	EIF3CL	728689
49.1623	-9.8214	0.17672	-55.5761	0	0	DOWN	CEMP1	752014
946.983	7.83709	0.163947	47.8027	0	0	UP	SERPINB5	5268
247.182	-7.193	0.154691	-46.499	0	0	DOWN	FAM106A	80039
177.134	-5.7855	0.0914512	-63.2632	0	0	DOWN	DNLZ	728489
38.9455	-5.6879	0.107493	-52.9142	0	0	DOWN	ZNF625-ZNF20	100529855
19.4241	-4.87624	0.119167	-40.9195	0	0	DOWN	LTC4S	4056
31.635	-9.18772	0.19462	-47.2084	0	0	DOWN	PTPRCAP	5790
85.0603	-7.83062	0.114475	-68.4044	0	0	DOWN	ZBTB9	221504
420.718	-8.25335	0.0982273	-84.0229	0	0	DOWN	SLX1A-SULT1A3	100526830
52.0647	-8.67766	0.189989	-45.6746	0	0	DOWN	SULT1A4	445329
242.053	-12.1202	0.168484	-71.937	0	0	DOWN	TREX1	11277
319.898	-3.04424	0.0572975	-53.1304	0	0	DOWN	GTF2H4	2968
845.018	-4.49392	0.0773034	-58.1335	0	0	DOWN	DDX47	51202
19.37	-8.25558	0.177742	-46.447	0	0	DOWN	SNURF	8926
254.361	-6.21427	0.124292	-49.9972	0	0	DOWN	AS3MT	57412
16.6497	-8.26384	0.170864	-48.365	0	0	DOWN	FAM187A	100528020
2854.77	-5.58178	0.14009	-39.8444	0	0	DOWN	PLIN5	440503
136.548	-3.45251	0.0750181	-46.0223	0	0	DOWN	NUTM2D	728130
878.136	-13.9791	0.166605	-83.9056	0	0	DOWN	TOMM6	100188893
160.999	-2.97672	0.0625664	-47.577	0	0	DOWN	MTCP1	4515
149.109	-8.74083	0.229067	-38.1583	0	0	DOWN	NPIPA7	101059938
20898.1	-6.10219	0.110877	-55.0354	0	0	DOWN	GOLGA8B	440270
158.646	-9.62265	0.183581	-52.4162	0	0	DOWN	RPL17-C18orf32	100526842
703.48	-4.74812	0.0973935	-48.7519	0	0	DOWN	IFI30	10437
1202.15	-3.62331	0.0575211	-62.991	0	0	DOWN	RNASEK	440400
102.489	-8.75579	0.130798	-66.9414	0	0	DOWN	ZNF321P	399669
219.65	-11.981	0.173842	-68.9187	0	0	DOWN	C1QTNF5	114902
53.206	-9.03073	0.175295	-51.5174	0	0	DOWN	POLR2J2	246721
25466.4	-2.86797	0.0703265	-40.7807	0	0	DOWN	RPL41	6171
278.653	-12.2396	0.28956	-42.2697	0	0	DOWN	PGA4	643847
326.887	6.10994	0.151435	40.347	0	0	UP	HLA-DQB2	3120
1734.06	-6.27166	0.0871895	-71.9314	0	0	DOWN	GOLGA8N	643699
494.31	-1.96426	0.0484276	-40.5607	0	0	NONE	FAM133B	257415
877.022	-5.86719	0.0819052	-71.6339	0	0	DOWN	HNRNPUL2-BSCL2	100534595
541.19	-3.33467	0.0832787	-40.0423	0	0	DOWN	LRRC37A2	474170
4625.27	-5.29752	0.0920489	-57.5512	0	0	DOWN	TXNDC5	81567
339.547	-4.84287	0.116348	-41.6239	0	0	DOWN	CDRT4	284040
1394.77	-2.97558	0.063183	-47.0946	0	0	DOWN	WBP1	23559
1077.25	-3.69157	0.0656901	-56.1968	0	0	DOWN	GET4	51608
328.392	-3.23406	0.0815149	-39.6745	0	0	DOWN	LY6G5B	58496
1129.34	-7.0755	0.0764731	-92.5228	0	0	DOWN	ACAD11	84129
104.258	-5.21352	0.0777754	-67.0331	0	0	DOWN	TICAM2	353376
467.69	-5.78896	0.0974784	-59.3871	0	0	DOWN	PLA2G4B	100137049
3220.07	-6.64268	0.11231	-59.1458	0	0	DOWN	NPIPB5	100132247
325.305	-3.13931	0.0429887	-73.0264	0	0	DOWN	TTC4	7268
198.729	-6.40644	0.0887339	-72.1983	0	0	DOWN	JMJD7	100137047
72.6541	-9.2749	0.168073	-55.1836	0	0	DOWN	DNAJC25-GNG10	552891
1706.77	-3.71643	0.0543037	-68.4379	0	0	DOWN	UBE2V1	7335
451.31	-2.91803	0.0640983	-45.5243	0	0	DOWN	BCKDHA	593
101.381	-2.56146	0.0594328	-43.0985	0	0	DOWN	RBM14-RBM4	100526737
464.947	-5.27237	0.0969222	-54.3979	0	0	DOWN	NAIP	4671
112.091	-3.18356	0.0550361	-57.8449	0	0	DOWN	ZNF564	163050
23.2144	-4.35157	0.113142	-38.461	0	0	DOWN	GOLGA8K	653125
58.8998	-3.48632	0.0802104	-43.4647	0	0	DOWN	ARPC4-TTLL3	100526693
179.716	-4.18974	0.0915208	-45.7792	0	0	DOWN	CDK3	1018
96.2679	7.24507	0.151492	47.8247	0	0	UP	PINX1	54984
48.3534	-7.44466	0.159719	-46.6111	0	0	DOWN	LRRC24	441381
564.949	-3.21599	0.0625096	-51.4479	0	0	DOWN	CHMP4A	29082
28300.2	-8.54128	0.22134	-38.589	0	0	DOWN	EEF1G	1937
26.6986	-8.87222	0.206156	-43.0364	0	0	DOWN	NPIPA2	642799
192.325	-9.99963	0.200043	-49.9875	0	0	DOWN	ATP6V1G2-DDX39B	100532737
1139.95	-4.21297	0.0586963	-71.7758	0	0	DOWN	ANKHD1-EIF4EBP3	404734
11.4728	-7.71738	0.196087	-39.357	0	0	DOWN	DND1	373863
21.437	-8.52454	0.219685	-38.8035	0	0	DOWN	LIMS3	96626
275.832	-7.60944	0.0821326	-92.6483	0	0	DOWN	TEN1	100134934
468.737	-4.10739	0.0593556	-69.1997	0	0	DOWN	C17orf49	124944
391.423	-4.52451	0.0662216	-68.3238	0	0	DOWN	RTEL1	51750
123.677	-2.79053	0.0728233	-38.3191	0	0	DOWN	PPT2-EGFL8	100532746
80.5104	-3.0745	0.0633328	-48.5451	0	0	DOWN	TRIM34	53840
161.488	-5.99649	0.132128	-45.3838	0	0	DOWN	TVP23C-CDRT4	100533496
469.139	-7.0165	0.115835	-60.5733	0	0	DOWN	BLOC1S5-TXNDC5	100526836
252.917	4.25468	0.104431	40.7415	0	0	UP	HOXB7	3217
40.8824	-6.20541	0.132164	-46.9523	0	0	DOWN	ANKRD20A1	84210
2865.19	-2.52262	0.0624462	-40.3967	0	0	DOWN	CCPG1	9236
178.596	-7.4113	0.114418	-64.774	0	0	DOWN	SULT1A3	6818
18.327	-5.31752	0.137027	-38.8064	0	0	DOWN	GOLGA8T	653075
32.1437	-5.50092	0.106443	-51.6793	0	0	DOWN	GOLGA8S	653061
399.261	-9.79783	0.107635	-91.0285	0	0	DOWN	ISY1-RAB43	100534599
234.929	9.22105	0.239051	38.5736	0	0	UP	MMP12	4321
291.719	-12.3895	0.169298	-73.1817	0	0	DOWN	OVCA2	124641
646.236	-2.69466	0.0582406	-46.2678	0	0	DOWN	NBPF11	200030
22154.3	-5.71706	0.0728941	-78.4298	0	0	DOWN	RPL17	6139
585.024	-2.01979	0.0516851	-39.0789	0	0	DOWN	STRADA	92335
571.794	-2.90213	0.0565307	-51.3373	0	0	DOWN	AARSD1	80755
1238.29	-3.35151	0.0887457	-37.7653	0	0	DOWN	NBPF12	149013
945.96	8.27171	0.208019	39.7642	0	0	UP	SLC6A14	11254
888.22	-8.24898	0.0755578	-109.174	0	0	DOWN	FAM156A	29057
443.044	-2.16007	0.0495884	-43.56	0	0	DOWN	IKBKG	8517
937.951	-3.05674	0.059408	-51.4533	0	0	DOWN	NBPF9	400818
94.4035	-8.79724	0.151462	-58.082	0	0	DOWN	COMMD3-BMI1	100532731
1729.05	-13.0032	0.131613	-98.7985	0	0	DOWN	LUC7L2	51631
993.862	-3.26625	0.0695184	-46.9839	0	0	DOWN	NBPF14	25832
50.7895	-6.3613	0.151921	-41.8724	0	0	DOWN	RPS10-NUDT3	100529239
454.291	-4.59833	0.0739645	-62.1695	0	0	DOWN	SRXN1	140809
280.001	-3.28065	0.06948	-47.2172	0	0	DOWN	NBPF10	100132406
806.924	5.0989	0.124325	41.0128	0	0	UP	MMP28	79148
1792.17	-5.30572	0.0871562	-60.876	0	0	DOWN	STAG3L5P-PVRIG2P-PILRB	101752399
324.438	-3.6304	0.0859303	-42.2482	0	0	DOWN	NBPF26	101060684
275.98	-9.66247	0.123246	-78.4001	0	0	DOWN	INO80B-WBP1	100532735
484.393	7.71118	0.200869	38.389	0	0	UP	CCL18	6362
299.574	-2.45411	0.0623114	-39.3846	0	0	DOWN	C11orf98	102288414
74.3801	-10.4157	0.168029	-61.9872	0	0	DOWN	C17orf100	388327
11579.6	-17.7003	0.186088	-95.1175	0	0	DOWN	MALAT1	378938
521.814	-2.22297	0.0586388	-37.9095	0	0	DOWN	PAGR1	79447
32.5837	-8.89355	0.19931	-44.6216	0	0	DOWN	GIMAP1-GIMAP5	100527949
11352.8	-4.72724	0.126084	-37.4929	1.2e-307	5.44e-306	DOWN	BNIP3	664
261.053	3.79188	0.10116	37.4842	1.67e-307	7.54e-306	UP	LPAR5	57121
3099.88	6.11161	0.163178	37.4537	5.22e-307	2.35e-305	UP	TRIM29	23650
2248.82	4.41192	0.117838	37.4406	8.54e-307	3.84e-305	UP	VILL	50853
3740.55	3.26674	0.0872751	37.4304	1.25e-306	5.61e-305	UP	MGLL	11343
5142.18	-2.73965	0.0732312	-37.4109	2.59e-306	1.16e-304	DOWN	NOMO1	23420
4189.87	3.21466	0.0859545	37.3996	3.97e-306	1.77e-304	UP	MARCKSL1	65108
1101.47	-1.89925	0.0507948	-37.3906	5.56e-306	2.48e-304	NONE	PSMC1	5700
155.738	7.71173	0.206303	37.3805	8.1e-306	3.6e-304	UP	LEMD1	93273
692.921	-3.45642	0.0924901	-37.3706	1.17e-305	5.19e-304	DOWN	RNASE4	6038
6138.05	-4.08174	0.109303	-37.3434	3.25e-305	1.44e-303	DOWN	GOLGA8A	23015
1608.5	-3.36194	0.0900793	-37.3221	7.2e-305	3.18e-303	DOWN	RAB24	53917
123.951	-3.91958	0.105041	-37.3148	9.45e-305	4.16e-303	DOWN	GOLGA6L10	647042
1000.09	-3.21425	0.0861922	-37.2916	2.25e-304	9.86e-303	DOWN	CYP51A1	1595
4198.42	4.06428	0.109004	37.2857	2.8e-304	1.23e-302	UP	ISLR	3671
23.2896	-2.93993	0.0788728	-37.2743	4.29e-304	1.87e-302	DOWN	ZNF625	90589
7357.13	4.79001	0.128677	37.2251	2.68e-303	1.17e-301	UP	PLAT	5327
137.782	-2.83281	0.0761537	-37.1985	7.21e-303	3.13e-301	DOWN	GPR146	115330
788.322	-2.36296	0.0635384	-37.1895	1.01e-302	4.38e-301	DOWN	PRPF40B	25766
4323.38	3.43914	0.0924878	37.1847	1.2e-302	5.21e-301	UP	CAPG	822
3842.36	2.81435	0.0757501	37.153	3.91e-302	1.69e-300	UP	COTL1	23406
592.405	-3.64911	0.0982811	-37.1293	9.47e-302	4.08e-300	DOWN	CPT1B	1375
160.552	5.53533	0.149132	37.1169	1.5e-301	6.45e-300	UP	PTPRR	5801
174.667	-4.03788	0.108838	-37.0998	2.83e-301	1.21e-299	DOWN	FER1L5	90342
58.3225	-3.62789	0.0978388	-37.0802	5.85e-301	2.5e-299	DOWN	ADORA2A	135
205.357	8.46873	0.228911	36.9958	1.34e-299	5.71e-298	UP	IGFL2	147920
300.764	4.10267	0.110917	36.9885	1.75e-299	7.45e-298	UP	CDK1	983
1096.14	3.94067	0.106619	36.9605	4.95e-299	2.1e-297	UP	HEPH	9843
202.469	-3.23179	0.0874459	-36.9576	5.5e-299	2.33e-297	DOWN	CAPN3	825
167.223	6.59322	0.178467	36.9437	9.21e-299	3.89e-297	UP	GJB4	127534
239.763	-3.15427	0.0853865	-36.9411	1.01e-298	4.27e-297	DOWN	EGFL8	80864
270.207	3.66975	0.0993431	36.9402	1.05e-298	4.41e-297	UP	CKS2	1164
5513.85	-2.64887	0.0718115	-36.8865	7.61e-298	3.19e-296	DOWN	PSMD6	9861
974.768	8.34546	0.226387	36.8637	1.77e-297	7.4e-296	UP	PADI1	29943
212.755	3.99735	0.108437	36.8633	1.79e-297	7.48e-296	UP	KIF2C	11004
444.16	5.04402	0.136961	36.8282	6.54e-297	2.73e-295	UP	ANLN	54443
290.491	3.73704	0.101576	36.7906	2.61e-296	1.09e-294	UP	ASPHD2	57168
868.427	-2.53824	0.0690051	-36.7833	3.41e-296	1.42e-294	DOWN	BSCL2	26580
666.048	3.55842	0.0968492	36.7418	1.57e-295	6.49e-294	UP	EPSTI1	94240
9358.34	4.70929	0.128186	36.7379	1.81e-295	7.48e-294	UP	THBS2	7058
5502.55	-3.6562	0.0995438	-36.7296	2.46e-295	1.01e-293	DOWN	KSR1	8844
406.505	3.09003	0.0841751	36.7096	5.14e-295	2.11e-293	UP	RGS10	6001
179.907	6.72489	0.183322	36.6835	1.34e-294	5.48e-293	UP	CST2	1470
16.7412	-5.01741	0.136799	-36.6773	1.68e-294	6.86e-293	DOWN	GOLGA8Q	727909
4338	2.97682	0.0812048	36.6582	3.39e-294	1.38e-292	UP	MYOF	26509
725.246	5.66723	0.154743	36.6234	1.21e-293	4.94e-292	UP	ADAM12	8038
820.512	8.27492	0.226053	36.6061	2.28e-293	9.27e-292	UP	FAM83A	84985
219.402	-4.5396	0.124048	-36.5954	3.38e-293	1.37e-291	DOWN	EML5	161436
185.826	4.42085	0.120838	36.5849	4.98e-293	2.01e-291	UP	BUB1	699
809.806	3.84926	0.105259	36.5695	8.74e-293	3.52e-291	UP	ADAM19	8728
157.714	4.43964	0.121434	36.5601	1.23e-292	4.96e-291	UP	RTKN2	219790
938.465	-4.10885	0.112495	-36.5249	4.47e-292	1.79e-290	DOWN	BEGAIN	57596
13.9923	-8.01431	0.219457	-36.5189	5.56e-292	2.23e-290	DOWN	PKD1L2	114780
1015.57	3.0909	0.0847216	36.4831	2.06e-291	8.23e-290	UP	SAMD9	54809
8982.61	3.22089	0.0882956	36.4784	2.44e-291	9.71e-290	UP	S100A10	6281
1082.6	3.65787	0.100279	36.4768	2.59e-291	1.03e-289	UP	FERMT1	55612
23064.9	3.0462	0.0835461	36.4613	4.55e-291	1.81e-289	UP	TMSB10	9168
1220.69	-2.26221	0.0620746	-36.4435	8.73e-291	3.46e-289	DOWN	NAA16	79612
33.5304	-2.25475	0.0619558	-36.3928	5.54e-290	2.19e-288	DOWN	C2orf15	150590
221.58	5.19222	0.14273	36.3779	9.51e-290	3.75e-288	UP	CEP55	55165
930.098	7.47714	0.205635	36.3612	1.75e-289	6.87e-288	UP	DHRS9	10170
1447.37	-1.82493	0.0502015	-36.352	2.44e-289	9.59e-288	NONE	ACAD8	27034
1188.42	4.09692	0.112775	36.3283	5.78e-289	2.27e-287	UP	OAS2	4939
471.418	-2.43112	0.0669264	-36.3253	6.46e-289	2.53e-287	DOWN	SARS2	54938
853.712	5.08041	0.139878	36.3202	7.77e-289	3.03e-287	UP	HPGD	3248
989.644	2.12923	0.0586754	36.2882	2.48e-288	9.67e-287	UP	RAP2B	5912
87.7773	-4.68336	0.129126	-36.2697	4.87e-288	1.89e-286	DOWN	NPIPA3	642778
265.932	-2.85024	0.0786135	-36.2564	7.88e-288	3.05e-286	DOWN	EMC6	83460
109.163	-4.56224	0.125874	-36.2443	1.22e-287	4.72e-286	DOWN	LHFPL5	222662
797.729	-2.31962	0.0640387	-36.2222	2.73e-287	1.05e-285	DOWN	MSTO1	55154
106.49	5.34566	0.147817	36.1641	2.23e-286	8.6e-285	UP	CREG2	200407
2189.01	-6.23532	0.17251	-36.1447	4.51e-286	1.73e-284	DOWN	ITIH4	3700
934.571	3.86769	0.107047	36.1307	7.47e-286	2.87e-284	UP	HOPX	84525
730.935	-2.66427	0.0738245	-36.0893	3.34e-285	1.28e-283	DOWN	MTG1	92170
475.152	5.63212	0.1562	36.0571	1.07e-284	4.08e-283	UP	LAMP5	24141
799.99	3.84882	0.106806	36.0357	2.31e-284	8.81e-283	UP	SELPLG	6404
114.663	-3.62547	0.100612	-36.0341	2.45e-284	9.33e-283	DOWN	LRRC37A	9884
24126.7	2.8488	0.0790735	36.0272	3.14e-284	1.19e-282	UP	HLA-A	3105
1057.19	3.58726	0.0997174	35.9742	2.12e-283	8.02e-282	UP	RAC2	5880
8.04019	-6.72553	0.187438	-35.8814	5.95e-282	2.25e-280	DOWN	FSBP	100861412
178.635	-3.29737	0.0919838	-35.8473	2.02e-281	7.63e-280	DOWN	ANKRD53	79998
4256.81	4.08061	0.113876	35.8339	3.27e-281	1.23e-279	UP	LAMA3	3909
2690.94	-1.13007	0.0315507	-35.8176	5.88e-281	2.21e-279	NONE	EXOC7	23265
5568.61	1.8589	0.0519192	35.8037	9.68e-281	3.63e-279	NONE	TSC22D1	8848
721.228	3.91655	0.109416	35.7949	1.32e-280	4.96e-279	UP	CD109	135228
152.065	4.78483	0.133674	35.7948	1.33e-280	4.97e-279	UP	GATA3	2625
325.197	3.2128	0.089846	35.7589	4.81e-280	1.79e-278	UP	ATP10A	57194
3399.37	4.19157	0.11723	35.7552	5.49e-280	2.04e-278	UP	HTRA3	94031
652.522	3.67963	0.102997	35.7257	1.58e-279	5.85e-278	UP	EDNRA	1909
1562.31	4.54795	0.127473	35.6779	8.72e-279	3.23e-277	UP	FNDC1	84624
6758.71	3.52197	0.098764	35.6604	1.62e-278	6e-277	UP	SDC1	6382
934.973	-2.4755	0.0694252	-35.6571	1.83e-278	6.75e-277	DOWN	MTERF2	80298
389.989	5.88592	0.165076	35.6559	1.91e-278	7.03e-277	UP	SCEL	8796
2093.12	-1.8102	0.0508278	-35.6143	8.42e-278	3.09e-276	NONE	UBA5	79876
4686.39	4.01811	0.112838	35.6096	9.97e-278	3.65e-276	UP	ANTXR1	84168
144.245	4.10642	0.115449	35.5693	4.19e-277	1.53e-275	UP	NDC80	10403
818.172	2.54112	0.071577	35.5019	4.6e-276	1.68e-274	UP	ELF4	2000
1210.56	-1.83395	0.0517578	-35.4333	5.25e-275	1.91e-273	NONE	RNF31	55072
807.462	2.56425	0.0723766	35.4293	6.05e-275	2.2e-273	UP	TRIM14	9830
13463.1	-2.47332	0.0698288	-35.4197	8.49e-275	3.08e-273	DOWN	EEF1D	1936
9286.31	3.6818	0.104077	35.3758	4.02e-274	1.46e-272	UP	ITGB4	3691
208.856	-4.31352	0.121997	-35.3575	7.7e-274	2.79e-272	DOWN	PDXP	57026
27.3426	-5.66565	0.16047	-35.3067	4.64e-273	1.67e-271	DOWN	PLGLB2	5342
3305	3.44674	0.0976445	35.2989	6.11e-273	2.2e-271	UP	CTSS	1520
507.528	4.97557	0.140973	35.2944	7.16e-273	2.57e-271	UP	TPX2	22974
27.9293	-4.39741	0.124632	-35.2831	1.06e-272	3.82e-271	DOWN	NPIPB6	728741
60831.5	4.84	0.137256	35.2625	2.21e-272	7.9e-271	UP	FN1	2335
331.516	3.9285	0.111503	35.2324	6.39e-272	2.28e-270	UP	BIK	638
17.908	-3.52282	0.100005	-35.2264	7.88e-272	2.81e-270	DOWN	GOLGA8M	653720
1353.38	3.2477	0.0922828	35.1929	2.57e-271	9.14e-270	UP	CMTM3	123920
1713.38	4.22626	0.120196	35.1614	7.78e-271	2.76e-269	UP	B3GNT3	10331
118.028	-2.53116	0.0720152	-35.1476	1.26e-270	4.48e-269	DOWN	TMEM262	100130348
1776.78	3.35391	0.0954264	35.1465	1.31e-270	4.65e-269	UP	F2R	2149
222.653	-7.79792	0.221955	-35.1329	2.12e-270	7.48e-269	DOWN	RGPD1	400966
133.975	-4.87234	0.138865	-35.0869	1.07e-269	3.76e-268	DOWN	CTAGE4	100128553
4396.54	4.06834	0.115958	35.0847	1.15e-269	4.05e-268	UP	SLC44A4	80736
12956.6	-2.38227	0.0679314	-35.0687	2.02e-269	7.1e-268	DOWN	OGT	8473
415.953	2.36059	0.0673135	35.0687	2.03e-269	7.1e-268	UP	GPR137B	7107
4683.32	3.47449	0.0992121	35.0208	1.09e-268	3.8e-267	UP	HLA-DPB1	3115
57.6665	-3.58213	0.10234	-35.0024	2.07e-268	7.21e-267	DOWN	CHRFAM7A	89832
699.958	-1.59088	0.0454566	-34.9977	2.44e-268	8.5e-267	NONE	ARMCX6	54470
3356.27	4.30027	0.122937	34.9795	4.62e-268	1.61e-266	UP	PLAU	5328
1124.46	2.7774	0.0794314	34.966	7.39e-268	2.56e-266	UP	NREP	9315
782.087	3.04589	0.0871206	34.9618	8.58e-268	2.97e-266	UP	SLC16A1	6566
1049.12	-2.40131	0.0687463	-34.93	2.6e-267	9e-266	DOWN	NBPF15	284565
1182.47	2.44705	0.0700992	34.9084	5.54e-267	1.91e-265	UP	PNMA1	9240
74.7463	4.31194	0.12355	34.9004	7.34e-267	2.53e-265	UP	SKA3	221150
964.049	3.89873	0.111789	34.8758	1.73e-266	5.96e-265	UP	NT5E	4907
372.522	4.5891	0.131656	34.8567	3.37e-266	1.16e-264	UP	TMEM92	162461
68.7518	4.2673	0.122465	34.845	5.08e-266	1.74e-264	UP	FOXP3	50943
53.3193	5.66829	0.162697	34.8395	6.14e-266	2.1e-264	UP	EPHX4	253152
145.375	7.59085	0.217989	34.8222	1.12e-265	3.83e-264	UP	NMU	10874
1875.52	3.0453	0.0875104	34.7993	2.49e-265	8.48e-264	UP	LAMA4	3910
281.139	4.87843	0.140208	34.7942	2.98e-265	1.01e-263	UP	GRIN2D	2906
190.896	4.33619	0.124625	34.7939	3e-265	1.02e-263	UP	NOX4	50507
3472.23	5.13443	0.147613	34.783	4.39e-265	1.49e-263	UP	MUC13	56667
1311.21	5.40876	0.155534	34.7754	5.72e-265	1.94e-263	UP	BCAS1	8537
194.801	3.58104	0.102983	34.7731	6.2e-265	2.09e-263	UP	GPR132	29933
21.8247	-5.84107	0.168086	-34.7505	1.36e-264	4.58e-263	DOWN	FLG2	388698
882.752	-1.86433	0.0536714	-34.7359	2.26e-264	7.6e-263	NONE	FAHD2A	51011
941.16	-4.73277	0.136264	-34.7325	2.55e-264	8.55e-263	DOWN	ACADL	33
318.517	5.0087	0.144215	34.7307	2.71e-264	9.08e-263	UP	CDA	978
619.805	4.1108	0.118481	34.6958	9.11e-264	3.05e-262	UP	FOXQ1	94234
149.635	5.19854	0.149857	34.6901	1.11e-263	3.71e-262	UP	DLGAP5	9787
1033.56	5.45861	0.157379	34.6845	1.35e-263	4.5e-262	UP	ST6GALNAC1	55808
266.089	3.04503	0.0878122	34.6766	1.78e-263	5.91e-262	UP	KIF11	3832
699.066	-2.10506	0.0607207	-34.6679	2.4e-263	7.97e-262	DOWN	CCNK	8812
2915.71	3.00102	0.0865687	34.6663	2.54e-263	8.41e-262	UP	PFKP	5214
8259.86	4.54733	0.131318	34.6284	9.44e-263	3.12e-261	UP	VCAN	1462
5820.37	2.4927	0.0720192	34.6116	1.69e-262	5.58e-261	UP	ITGB5	3693
349.792	1.80793	0.0522393	34.6086	1.88e-262	6.19e-261	NONE	XXYLT1	152002
842.892	5.01989	0.145121	34.5911	3.44e-262	1.13e-260	UP	FAM83E	54854
6679.26	-2.63128	0.0761191	-34.5679	7.67e-262	2.52e-260	DOWN	RPL36A	6173
341.98	3.58373	0.103716	34.5531	1.28e-261	4.19e-260	UP	SLC16A4	9122
118.58	3.37705	0.0977408	34.551	1.38e-261	4.5e-260	UP	NINJ2	4815
385.031	4.21654	0.122065	34.5433	1.8e-261	5.87e-260	UP	WNT7B	7477
1555.99	6.15765	0.178272	34.5409	1.96e-261	6.38e-260	UP	EPS8L3	79574
136.085	3.57658	0.103579	34.5298	2.86e-261	9.32e-260	UP	CENPE	1062
17418.7	2.23341	0.0647214	34.508	6.09e-261	1.98e-259	UP	CFL1	1072
191.338	3.0605	0.0887609	34.4803	1.58e-260	5.14e-259	UP	MAD2L1	4085
76.3788	-4.73185	0.137246	-34.4772	1.76e-260	5.7e-259	DOWN	KCNA2	3737
2124.95	4.79452	0.139295	34.4199	1.27e-259	4.1e-258	UP	HLA-DQA1	3117
382.361	6.46177	0.187898	34.3897	3.59e-259	1.16e-257	UP	DKK1	22943
12709.6	3.72227	0.108243	34.388	3.82e-259	1.23e-257	UP	HLA-DRA	3122
1294.16	3.99229	0.116122	34.38	5.02e-259	1.61e-257	UP	OAS1	4938
2619.92	3.27623	0.0953408	34.3633	8.9e-259	2.86e-257	UP	RAB31	11031
336.038	5.43091	0.158133	34.344	1.73e-258	5.55e-257	UP	UBE2C	11065
325.988	4.17024	0.121468	34.3321	2.61e-258	8.34e-257	UP	SLC4A11	83959
2088.05	-1.90199	0.055482	-34.2812	1.49e-257	4.77e-256	NONE	POM121	9883
865.203	3.19067	0.093091	34.2747	1.87e-257	5.95e-256	UP	PSMB9	5698
279.743	3.0198	0.0881099	34.2732	1.97e-257	6.27e-256	UP	AP1S3	130340
23.506	-7.45041	0.217709	-34.2219	1.14e-256	3.63e-255	DOWN	CRNN	49860
213.461	3.70398	0.108369	34.1792	4.92e-256	1.56e-254	UP	CCNB2	9133
765.881	4.1613	0.121874	34.1444	1.62e-255	5.13e-254	UP	COL8A2	1296
198.099	-4.81216	0.140937	-34.144	1.64e-255	5.19e-254	DOWN	SLC2A14	144195
111.962	4.05851	0.118918	34.1288	2.76e-255	8.71e-254	UP	NCAPH	23397
1515.07	-3.35737	0.0983797	-34.1266	2.97e-255	9.36e-254	DOWN	SLC25A45	283130
2174.27	-5.56786	0.163177	-34.1215	3.54e-255	1.11e-253	DOWN	IGFN1	91156
5541.26	-2.20001	0.0645107	-34.103	6.65e-255	2.09e-253	DOWN	GRB10	2887
145.365	-2.35138	0.0689515	-34.1019	6.91e-255	2.17e-253	DOWN	MDP1	145553
233.516	-2.53272	0.0743323	-34.0729	1.86e-254	5.81e-253	DOWN	HYPK	25764
998.409	-2.21355	0.0649713	-34.0697	2.07e-254	6.47e-253	DOWN	TRIM52	84851
542.241	2.17084	0.0637455	34.0548	3.44e-254	1.07e-252	UP	NDE1	54820
12.9	-7.72914	0.227141	-34.028	8.59e-254	2.67e-252	DOWN	HAPLN4	404037
971.913	-1.99997	0.0587891	-34.0194	1.15e-253	3.57e-252	NONE	SMAP1	60682
1444.95	2.18236	0.0641864	34.0003	2.2e-253	6.83e-252	UP	ELK3	2004
1094.41	-1.92113	0.0565046	-33.9995	2.26e-253	7.01e-252	NONE	PSMA2	5683
42.2261	-9.60218	0.282466	-33.9941	2.72e-253	8.41e-252	DOWN	TNFRSF6B	8771
4016.61	2.59176	0.076302	33.9671	6.82e-253	2.1e-251	UP	VASP	7408
830.675	-2.77641	0.0817622	-33.9571	9.58e-253	2.95e-251	DOWN	SLC46A1	113235
1265.75	4.1507	0.122247	33.9534	1.09e-252	3.34e-251	UP	ITGA11	22801
250.602	7.01797	0.206797	33.9365	1.93e-252	5.93e-251	UP	IHH	3549
99.8236	-2.61094	0.076949	-33.9309	2.34e-252	7.16e-251	DOWN	ANKRD23	200539
4078.73	-2.17622	0.0641459	-33.9261	2.74e-252	8.39e-251	DOWN	MAN2A2	4122
167.749	4.65075	0.137168	33.9055	5.53e-252	1.69e-250	UP	KIF4A	24137
292.283	-4.03737	0.119185	-33.8748	1.57e-251	4.78e-250	DOWN	CECR2	27443
652.919	3.73017	0.110122	33.873	1.67e-251	5.07e-250	UP	SLC45A3	85414
249.452	-3.34882	0.0988737	-33.8697	1.86e-251	5.65e-250	DOWN	CHKB-CPT1B	386593
112.386	3.21771	0.0950068	33.8682	1.96e-251	5.95e-250	UP	CENPW	387103
138.891	3.67966	0.108769	33.8301	7.11e-251	2.15e-249	UP	SERTAD4	56256
3793.37	-2.25289	0.0666075	-33.8234	8.94e-251	2.7e-249	DOWN	PRELID1	27166
1136.93	3.88747	0.114987	33.8079	1.51e-250	4.56e-249	UP	EDIL3	10085
200.334	2.86288	0.0849658	33.6945	6.96e-249	2.1e-247	UP	HENMT1	113802
530.206	5.68272	0.168675	33.6903	8.01e-249	2.41e-247	UP	STRA6	64220
913.153	3.06776	0.0910683	33.6864	9.15e-249	2.75e-247	UP	SGPP2	130367
12.3149	-3.5288	0.104863	-33.6517	2.95e-248	8.83e-247	DOWN	MSANTD3-TMEFF1	100526694
2467.77	3.33039	0.0989871	33.6447	3.73e-248	1.12e-246	UP	LTBP1	4052
2764.97	3.71409	0.110426	33.6343	5.3e-248	1.58e-246	UP	CTSK	1513
828.027	-1.65296	0.0491524	-33.6293	6.26e-248	1.87e-246	NONE	RNF214	257160
3165.75	-2.03691	0.0606581	-33.5802	3.26e-247	9.72e-246	DOWN	SPATA13	221178
289.069	-5.99277	0.17853	-33.5674	5.03e-247	1.49e-245	DOWN	RGPD2	729857
133.684	4.04616	0.120577	33.5566	7.21e-247	2.14e-245	UP	DTL	51514
115.241	-3.19709	0.0952973	-33.5486	9.43e-247	2.8e-245	DOWN	LAT	27040
506.307	2.42879	0.0724224	33.5364	1.42e-246	4.2e-245	UP	LMNB1	4001
230.265	3.79136	0.113139	33.5105	3.39e-246	1e-244	UP	KIFC1	3833
205.958	3.80841	0.11367	33.5042	4.18e-246	1.23e-244	UP	ASF1B	55723
2062.34	3.30478	0.0986623	33.4959	5.53e-246	1.63e-244	UP	FSCN1	6624
2197.47	2.90511	0.086747	33.4894	6.87e-246	2.02e-244	UP	SLC6A6	6533
1410.06	7.33292	0.21909	33.47	1.32e-245	3.87e-244	UP	S100A2	6273
94.2739	4.08802	0.122174	33.4606	1.81e-245	5.3e-244	UP	NUF2	83540
542.738	5.53486	0.16552	33.4393	3.69e-245	1.08e-243	UP	SPDEF	25803
226.897	3.71597	0.111132	33.4375	3.91e-245	1.14e-243	UP	CDCA5	113130
158.729	-3.18638	0.0953319	-33.4241	6.13e-245	1.79e-243	DOWN	LRRC8E	80131
2265.82	2.92052	0.0873851	33.4212	6.75e-245	1.97e-243	UP	EFNB1	1947
10461.8	-2.22671	0.0666495	-33.4093	1.01e-244	2.93e-243	DOWN	EIF3L	51386
457.921	5.6731	0.169853	33.4001	1.37e-244	3.96e-243	UP	CLIC3	9022
3251.73	-2.30474	0.0690107	-33.3968	1.52e-244	4.42e-243	DOWN	GTF2I	2969
129.377	4.79037	0.143445	33.3951	1.61e-244	4.67e-243	UP	SPOCD1	90853
12264	3.28554	0.0983866	33.3942	1.66e-244	4.81e-243	UP	S100A11	6282
60.8668	5.36902	0.160837	33.3818	2.52e-244	7.27e-243	UP	EGFL6	25975
156.131	3.75574	0.112521	33.3781	2.85e-244	8.21e-243	UP	BCL11B	64919
2875.59	5.84118	0.175047	33.3692	3.84e-244	1.11e-242	UP	GCNT3	9245
1979.64	3.07802	0.0923427	33.3326	1.3e-243	3.74e-242	UP	ARL4C	10123
2637.79	5.08802	0.15286	33.2855	6.27e-243	1.8e-241	UP	COMP	1311
2112.44	2.60065	0.0781928	33.2594	1.49e-242	4.27e-241	UP	OCIAD2	132299
1118.2	5.24435	0.157821	33.2298	4e-242	1.14e-240	UP	CRABP2	1382
245.111	3.51214	0.105733	33.2172	6.08e-242	1.73e-240	UP	GPR68	8111
297.547	6.8235	0.205518	33.2015	1.02e-241	2.92e-240	UP	TRIM15	89870
115.908	5.83435	0.175858	33.1765	2.35e-241	6.68e-240	UP	PPP1R14D	54866
239.826	-2.89926	0.0874425	-33.1562	4.61e-241	1.31e-239	DOWN	DDTL	100037417
2940.03	-2.84883	0.0859249	-33.1549	4.81e-241	1.37e-239	DOWN	ABCA5	23461
164.543	2.81474	0.0849281	33.1426	7.25e-241	2.05e-239	UP	STON2	85439
185.732	2.342	0.0706667	33.1415	7.51e-241	2.12e-239	UP	C1orf54	79630
331.395	-3.02226	0.0911985	-33.1394	8.05e-241	2.27e-239	DOWN	ADAMTS17	170691
103.961	-8.95728	0.270354	-33.1317	1.04e-240	2.93e-239	DOWN	F8A3	474384
137.415	4.35143	0.13141	33.1135	1.9e-240	5.35e-239	UP	TRABD2A	129293
33329	2.78562	0.0841244	33.1131	1.92e-240	5.4e-239	UP	HLA-B	3106
898.202	2.98027	0.0900562	33.0934	3.7e-240	1.04e-238	UP	EMP3	2014
762.459	1.88738	0.0570508	33.0824	5.32e-240	1.49e-238	NONE	BPNT1	10380
2070.6	2.48037	0.0749815	33.0798	5.81e-240	1.62e-238	UP	ANTXR2	118429
324.201	4.71888	0.142834	33.0374	2.36e-239	6.58e-238	UP	CDC20	991
959.412	1.62081	0.0490695	33.0309	2.92e-239	8.15e-238	NONE	STX6	10228
671.949	2.75408	0.0834109	33.0183	4.44e-239	1.24e-237	UP	TBC1D2	55357
348.938	3.22012	0.0977054	32.9574	3.31e-238	9.2e-237	UP	SLC24A3	57419
3021.17	1.7194	0.0521786	32.9522	3.94e-238	1.09e-236	NONE	ARF6	382
691.696	-4.80049	0.145722	-32.9428	5.36e-238	1.48e-236	DOWN	VIPR2	7434
145.162	5.77418	0.175351	32.9293	8.38e-238	2.32e-236	UP	CCL22	6367
263.466	-9.31294	0.282875	-32.9224	1.05e-237	2.9e-236	DOWN	PGA3	643834
343.948	6.29179	0.19127	32.8949	2.6e-237	7.17e-236	UP	TM4SF5	9032
596.716	-2.41507	0.073437	-32.8863	3.45e-237	9.5e-236	DOWN	NBPF19	101060226
906.846	1.97754	0.0601639	32.8693	6.05e-237	1.66e-235	NONE	CTTNBP2NL	55917
12796	2.97991	0.0906801	32.8618	7.73e-237	2.12e-235	UP	MMP14	4323
1356.17	2.07938	0.0632931	32.8532	1.03e-236	2.81e-235	UP	AFAP1	60312
142.766	4.98627	0.151791	32.8497	1.15e-236	3.15e-235	UP	IL2RA	3559
1107.37	3.01424	0.0919472	32.7823	1.05e-235	2.88e-234	UP	SYTL2	54843
1474.42	3.55749	0.108528	32.7794	1.16e-235	3.16e-234	UP	USH1C	10083
215.036	3.20943	0.0979611	32.7623	2.03e-235	5.53e-234	UP	FCHO1	23149
27.7044	-3.5382	0.108123	-32.7238	7.17e-235	1.95e-233	DOWN	SPDYE2	441273
744.399	2.53272	0.077486	32.6861	2.46e-234	6.68e-233	UP	ABCG1	9619
1163.03	1.6565	0.0506943	32.6763	3.39e-234	9.21e-233	NONE	NAGA	4668
674.882	2.48762	0.0761446	32.6696	4.22e-234	1.14e-232	UP	BCAR3	8412
125.383	3.8834	0.118904	32.6598	5.81e-234	1.57e-232	UP	FRMD5	84978
1374.41	-1.90627	0.058379	-32.6534	7.18e-234	1.94e-232	NONE	CLK4	57396
1034.87	-2.25576	0.0691105	-32.6399	1.11e-233	3e-232	DOWN	TRIM66	9866
3700.05	-2.52198	0.0772707	-32.6382	1.18e-233	3.17e-232	DOWN	IFRD1	3475
13260.6	2.35388	0.0721391	32.6297	1.56e-233	4.18e-232	UP	TPM4	7171
1621.6	-2.95946	0.0907254	-32.6199	2.14e-233	5.75e-232	DOWN	GSTM2	2946
2830.16	-2.25381	0.0691089	-32.6125	2.73e-233	7.31e-232	DOWN	PAN2	9924
789.876	4.71383	0.144585	32.6024	3.79e-233	1.01e-231	UP	TOP2A	7153
19088.2	3.28061	0.100729	32.5688	1.14e-232	3.04e-231	UP	BGN	633
6588.97	7.55036	0.231866	32.5635	1.35e-232	3.6e-231	UP	CLDN18	51208
197.743	4.28203	0.1315	32.563	1.37e-232	3.65e-231	UP	ASPM	259266
5.5987	-5.94697	0.182792	-32.5341	3.51e-232	9.35e-231	DOWN	NOXO1	124056
421.336	3.66351	0.112606	32.5339	3.53e-232	9.39e-231	UP	ZNF469	84627
249.919	6.84308	0.210358	32.5306	3.94e-232	1.05e-230	UP	WNT7A	7476
179.422	3.8582	0.118605	32.53	4.02e-232	1.07e-230	UP	SEMA3A	10371
335.019	2.1291	0.0654668	32.5219	5.23e-232	1.39e-230	UP	B3GALT4	8705
836.552	2.52099	0.0775369	32.5133	6.91e-232	1.83e-230	UP	GPX8	493869
69.8384	3.57897	0.110145	32.4932	1.33e-231	3.51e-230	UP	HOXC4	3221
59.891	-3.53834	0.108913	-32.4878	1.59e-231	4.18e-230	DOWN	NUTM2A	728118
54.4834	4.27495	0.131594	32.4859	1.69e-231	4.44e-230	UP	BCO1	53630
1860.45	4.00599	0.123339	32.4794	2.08e-231	5.47e-230	UP	ECM1	1893
3046.72	2.54944	0.0785234	32.4672	3.09e-231	8.12e-230	UP	TTYH3	80727
319.794	3.54302	0.109175	32.4525	5e-231	1.31e-229	UP	TMC7	79905
416.466	-1.76739	0.0544791	-32.4415	7.13e-231	1.87e-229	NONE	METAP1D	254042
97.5759	5.40644	0.16674	32.4243	1.25e-230	3.26e-229	UP	TNFSF9	8744
256.297	6.003	0.185152	32.4219	1.35e-230	3.51e-229	UP	CST6	1474
60.2658	-3.47234	0.107136	-32.4104	1.96e-230	5.1e-229	DOWN	BCL2L2-PABPN1	100529063
1131.7	-1.63583	0.0505082	-32.3875	4.12e-230	1.07e-228	NONE	CLCC1	23155
3907.8	4.14886	0.128168	32.3706	7.11e-230	1.85e-228	UP	ITGB6	3694
936.254	4.6772	0.144511	32.3658	8.32e-230	2.16e-228	UP	MKI67	4288
566.797	2.64961	0.0818838	32.3581	1.07e-229	2.76e-228	UP	SEC14L2	23541
345.049	-4.72187	0.14593	-32.3571	1.1e-229	2.85e-228	DOWN	GDF10	2662
2684.58	2.91511	0.0901022	32.3534	1.24e-229	3.21e-228	UP	PDLIM7	9260
2435.01	2.98481	0.0923389	32.3245	3.17e-229	8.18e-228	UP	RUNX1	861
85.9196	4.65217	0.144032	32.2996	7.08e-229	1.82e-227	UP	CKAP2L	150468
109.512	-7.21716	0.22353	-32.2872	1.06e-228	2.72e-227	DOWN	CYP3A43	64816
1206.97	7.52733	0.233161	32.2838	1.18e-228	3.04e-227	UP	MUC16	94025
529.635	3.38279	0.10487	32.2568	2.82e-228	7.24e-227	UP	PRR15	222171
8026.12	2.00164	0.0620638	32.2513	3.37e-228	8.63e-227	UP	CAP1	10487
605.824	2.82238	0.0875319	32.244	4.27e-228	1.09e-226	UP	ECT2	1894
365.251	3.13831	0.0973366	32.2418	4.58e-228	1.17e-226	UP	PRR5L	79899
172.506	-2.8796	0.0893313	-32.235	5.71e-228	1.46e-226	DOWN	TEN1-CDK3	100529145
311.747	3.86657	0.120038	32.2112	1.23e-227	3.13e-226	UP	LCK	3932
1651.9	2.47708	0.0769261	32.2008	1.72e-227	4.37e-226	UP	MARVELD1	83742
6850.5	4.03858	0.125442	32.1948	2.09e-227	5.3e-226	UP	COL12A1	1303
906.436	-2.34706	0.0729436	-32.1763	3.78e-227	9.6e-226	DOWN	SLC2A11	66035
157.579	4.87388	0.151488	32.1733	4.17e-227	1.06e-225	UP	TNFAIP6	7130
5464.76	3.95429	0.122973	32.1558	7.33e-227	1.85e-225	UP	FXYD3	5349
1875.26	2.77339	0.0862611	32.1511	8.52e-227	2.15e-225	UP	GBP2	2634
2497.57	2.60346	0.0809959	32.1431	1.1e-226	2.78e-225	UP	LBH	81606
651.929	3.58581	0.111603	32.13	1.68e-226	4.22e-225	UP	PPARG	5468
2108.77	7.23313	0.225156	32.125	1.97e-226	4.95e-225	UP	CXCL5	6374
747.623	1.91427	0.0596055	32.1157	2.66e-226	6.67e-225	NONE	MR1	3140
140.933	-5.05248	0.157322	-32.1156	2.67e-226	6.7e-225	DOWN	IZUMO1	284359
77.8868	4.02757	0.125416	32.1136	2.84e-226	7.12e-225	UP	KIF14	9928
167.809	4.60373	0.14347	32.0884	6.41e-226	1.6e-224	UP	KIF20A	10112
1046.16	-2.4308	0.0758162	-32.0618	1.5e-225	3.75e-224	DOWN	NDUFV2	4729
1047.21	8.73644	0.272494	32.061	1.54e-225	3.84e-224	UP	MUC17	140453
31.0724	-2.64166	0.0824222	-32.0504	2.17e-225	5.39e-224	DOWN	TSSK3	81629
148.849	4.07848	0.127266	32.0469	2.42e-225	6.02e-224	UP	MELK	9833
739.686	3.57672	0.111652	32.0346	3.6e-225	8.93e-224	UP	BMP4	652
576.69	3.84251	0.120045	32.009	8.16e-225	2.02e-223	UP	GPR35	2859
1177.82	-2.76093	0.0862951	-31.994	1.32e-224	3.27e-223	DOWN	TTN	7273
10321.1	2.17263	0.0679614	31.9686	2.98e-224	7.36e-223	UP	GRN	2896
2242.07	2.12505	0.0665051	31.9531	4.89e-224	1.21e-222	UP	MYO1E	4643
204.264	3.21724	0.100741	31.9356	8.55e-224	2.11e-222	UP	CDCA8	55143
59.4915	4.02628	0.126159	31.9145	1.68e-223	4.14e-222	UP	CDCA2	157313
1064.32	2.67331	0.0837757	31.9104	1.92e-223	4.72e-222	UP	INPP4B	8821
5982.42	3.09828	0.0970998	31.9082	2.06e-223	5.05e-222	UP	LGALS1	3956
119.67	7.74102	0.242684	31.8975	2.9e-223	7.1e-222	UP	HOXB9	3219
219.264	5.63828	0.176784	31.8937	3.27e-223	8e-222	UP	CILP2	148113
17127.6	3.80066	0.119172	31.8924	3.41e-223	8.33e-222	UP	LUM	4060
687.283	4.61841	0.144885	31.8763	5.69e-223	1.39e-221	UP	AGR3	155465
117.215	3.62887	0.113849	31.8743	6.06e-223	1.48e-221	UP	SHCBP1	79801
129.391	3.71537	0.116624	31.8576	1.03e-222	2.52e-221	UP	HMMR	3161
1305.27	-1.51476	0.0475656	-31.8457	1.51e-222	3.67e-221	NONE	NUDT3	11165
2925.58	1.60781	0.0504988	31.8386	1.89e-222	4.6e-221	NONE	MTPN	136319
724.611	2.91698	0.0916313	31.8339	2.2e-222	5.33e-221	UP	GBP4	115361
99582.9	2.29547	0.072111	31.8324	2.3e-222	5.58e-221	UP	ACTB	60
100.422	-3.33705	0.104844	-31.8288	2.59e-222	6.26e-221	DOWN	ACTN2	88
397.274	-4.07353	0.128037	-31.8154	3.97e-222	9.58e-221	DOWN	SPSB4	92369
1842.57	3.57181	0.112315	31.8016	6.14e-222	1.48e-220	UP	HK2	3099
1401	-3.63363	0.114278	-31.7965	7.23e-222	1.74e-220	DOWN	KLF15	28999
82.0969	4.11668	0.129526	31.7828	1.12e-221	2.7e-220	UP	DEPDC1B	55789
37811.5	3.10436	0.0977185	31.7684	1.77e-221	4.25e-220	UP	CD74	972
733.912	2.74958	0.0866092	31.747	3.49e-221	8.37e-220	UP	TACC3	10460
1643.87	-3.75685	0.118361	-31.7405	4.29e-221	1.03e-219	DOWN	PILRB	29990
357.321	-1.64794	0.0519375	-31.7292	6.14e-221	1.47e-219	NONE	SWT1	54823
5632.78	3.36231	0.105969	31.7292	6.16e-221	1.47e-219	UP	ANXA1	301
795.331	2.68558	0.0846704	31.718	8.77e-221	2.09e-219	UP	SLC15A3	51296
59.5405	4.54246	0.143311	31.6965	1.74e-220	4.14e-219	UP	E2F8	79733
724.106	3.24681	0.102541	31.6636	4.92e-220	1.17e-218	UP	PAQR8	85315
114.654	4.15178	0.13113	31.6616	5.24e-220	1.25e-218	UP	CENPM	79019
49.4435	3.77368	0.119318	31.6271	1.57e-219	3.72e-218	UP	TMEM200C	645369
5.67994	-6.71316	0.212297	-31.6215	1.87e-219	4.43e-218	DOWN	FXYD6-FXYD2	100533181
2683.97	2.59407	0.0820821	31.6033	3.32e-219	7.87e-218	UP	ARHGDIB	397
113.518	-1.75457	0.0555224	-31.601	3.57e-219	8.45e-218	NONE	SPIN2B	474343
904.172	2.4735	0.0782861	31.5956	4.24e-219	1e-217	UP	RFTN1	23180
397.801	2.02202	0.0640134	31.5875	5.49e-219	1.3e-217	UP	BICD1	636
97.4114	3.565	0.11288	31.5822	6.49e-219	1.53e-217	UP	CDKN3	1033
23.3193	-5.12831	0.162435	-31.5715	9.1e-219	2.14e-217	DOWN	HSPE1-MOB4	100529241
15.6274	-5.00771	0.158625	-31.5695	9.69e-219	2.28e-217	DOWN	NPHP3-ACAD11	100532724
323.198	5.38561	0.170603	31.5681	1.01e-218	2.38e-217	UP	SHH	6469
579.856	3.00952	0.0953827	31.5521	1.68e-218	3.93e-217	UP	ETV1	2115
530.683	-4.31133	0.136691	-31.5408	2.4e-218	5.61e-217	DOWN	CHAD	1101
67.9	-5.79384	0.183726	-31.5352	2.86e-218	6.68e-217	DOWN	ACSM6	142827
2764.82	-4.95268	0.157059	-31.5338	2.99e-218	6.98e-217	DOWN	BRSK2	9024
1270.11	-2.16065	0.0685369	-31.5253	3.91e-218	9.12e-217	DOWN	PMM2	5373
57.2726	-2.09342	0.066407	-31.524	4.07e-218	9.48e-217	DOWN	NEURL2	140825
3689.84	1.87976	0.0596677	31.5038	7.71e-218	1.79e-216	NONE	MAP4K4	9448
2601.69	-2.04875	0.0650505	-31.4948	1.02e-217	2.38e-216	DOWN	SLC35E2B	728661
5297.99	1.69885	0.053991	31.4654	2.58e-217	6e-216	NONE	CAPZB	832
1017.29	1.6601	0.0527881	31.4484	4.42e-217	1.02e-215	NONE	PLEKHA2	59339
6.70277	-6.72805	0.21409	-31.4263	8.86e-217	2.05e-215	DOWN	DMRTC1	63947
6963.26	-2.93811	0.0935607	-31.4033	1.82e-216	4.22e-215	DOWN	TECPR1	25851
678.611	1.66967	0.0531837	31.3945	2.41e-216	5.56e-215	NONE	BID	637
273.014	2.51332	0.0800902	31.3811	3.66e-216	8.44e-215	UP	ARHGAP42	143872
201.292	-2.70825	0.086305	-31.38	3.79e-216	8.74e-215	DOWN	PRSS53	339105
1267.8	2.94314	0.0937926	31.3792	3.89e-216	8.95e-215	UP	PLCD3	113026
380.94	3.18517	0.10154	31.3686	5.42e-216	1.25e-214	UP	RUNX2	860
21697.2	-2.75755	0.0879578	-31.3508	9.48e-216	2.17e-214	DOWN	LENG8	114823
161.849	-2.51212	0.080165	-31.3369	1.47e-215	3.36e-214	DOWN	MAP6D1	79929
5060.96	3.43484	0.109705	31.3097	3.45e-215	7.88e-214	UP	FBN1	2200
149.278	3.7972	0.121301	31.3039	4.13e-215	9.43e-214	UP	IL4I1	259307
9793.54	2.27977	0.0728302	31.3025	4.32e-215	9.85e-214	UP	CLIC1	1192
87.5542	5.96779	0.190851	31.2693	1.22e-214	2.78e-213	UP	AGMO	392636
395.989	3.06746	0.0981081	31.2661	1.35e-214	3.07e-213	UP	EPHA4	2043
277.255	4.56931	0.146151	31.2643	1.43e-214	3.25e-213	UP	KCP	375616
37.6157	-4.59989	0.147282	-31.2318	3.95e-214	8.96e-213	DOWN	KIAA0408	9729
784.977	-1.52667	0.0488901	-31.2267	4.63e-214	1.05e-212	NONE	EDRF1	26098
1234.26	5.61676	0.179996	31.205	9.12e-214	2.06e-212	UP	AQP5	362
90.1359	3.25859	0.104466	31.1929	1.33e-213	3e-212	UP	RAD51	5888
163.16	3.39971	0.109053	31.1749	2.33e-213	5.27e-212	UP	PKIA	5569
1355.7	2.96973	0.0952623	31.1742	2.39e-213	5.38e-212	UP	ABHD17C	58489
60.6997	4.15021	0.13313	31.1741	2.39e-213	5.39e-212	UP	EXO1	9156
90.4329	3.19492	0.102495	31.1715	2.59e-213	5.83e-212	UP	KIF15	56992
360.403	2.3188	0.0744097	31.1627	3.42e-213	7.67e-212	UP	RACGAP1	29127
7025.91	-3.50803	0.112615	-31.1506	4.97e-213	1.12e-211	DOWN	EPB41L4B	54566
2768	-1.89941	0.0609904	-31.1428	6.36e-213	1.42e-211	NONE	SEC24C	9632
437.024	2.75672	0.0885426	31.1344	8.25e-213	1.85e-211	UP	PRDM1	639
23170.4	2.32177	0.074581	31.1308	9.22e-213	2.06e-211	UP	CTSB	1508
206.979	-2.85287	0.0916522	-31.1272	1.03e-212	2.31e-211	DOWN	SYPL2	284612
553.789	3.50495	0.112602	31.1268	1.05e-212	2.33e-211	UP	MDFI	4188
596.525	2.97029	0.0954392	31.1223	1.2e-212	2.67e-211	UP	PTAFR	5724
625.126	-1.77493	0.0570344	-31.1204	1.28e-212	2.84e-211	NONE	TUBE1	51175
274.655	3.52362	0.113253	31.1127	1.62e-212	3.61e-211	UP	HOXB6	3216
130.22	6.51907	0.209574	31.1063	1.98e-212	4.39e-211	UP	GPA33	10223
1279.23	-1.80259	0.0579768	-31.0916	3.13e-212	6.93e-211	NONE	ING5	84289
619.443	2.46698	0.0794119	31.0656	7.02e-212	1.55e-210	UP	IFI27L2	83982
326.893	2.32969	0.0750274	31.0512	1.1e-211	2.43e-210	UP	RASGEF1B	153020
95.6775	5.36677	0.172837	31.051	1.11e-211	2.44e-210	UP	NRG3	10718
60.2344	5.7424	0.184998	31.0403	1.54e-211	3.4e-210	UP	ABCA12	26154
730.931	2.01793	0.0650289	31.0313	2.04e-211	4.49e-210	UP	SERTAD3	29946
390.489	-1.7942	0.057851	-31.0142	3.47e-211	7.64e-210	NONE	ZSCAN2	54993
457.747	-2.40816	0.0776655	-31.0069	4.36e-211	9.58e-210	DOWN	TRIM45	80263
73.9155	-3.67757	0.118628	-31.0009	5.25e-211	1.15e-209	DOWN	A1BG	1
4191.13	-1.7191	0.0554697	-30.9917	6.98e-211	1.53e-209	NONE	DCAF8	50717
1805.9	-2.13554	0.0689181	-30.9866	8.17e-211	1.79e-209	DOWN	WDR91	29062
399.192	2.65102	0.085562	30.9836	8.97e-211	1.96e-209	UP	CCNB1	891
39.4035	-2.51187	0.0810717	-30.9834	9.03e-211	1.97e-209	DOWN	KRBA2	124751
78.3596	3.40352	0.109891	30.9719	1.29e-210	2.81e-209	UP	ADAMTS6	11174
116.822	-9.87299	0.31882	-30.9673	1.49e-210	3.24e-209	DOWN	NPIPA8	101059953
134.336	2.73497	0.0883296	30.9633	1.68e-210	3.66e-209	UP	POC1A	25886
202.165	3.66079	0.118258	30.9559	2.12e-210	4.61e-209	UP	PPP1R14C	81706
19.5425	-3.40239	0.109941	-30.9474	2.75e-210	5.97e-209	DOWN	TBC1D3B	414059
1319.33	5.05023	0.163273	30.9313	4.54e-210	9.84e-209	UP	MUC4	4585
422.787	4.12104	0.133364	30.9007	1.17e-209	2.53e-208	UP	XDH	7498
646.981	-1.60698	0.0520098	-30.8977	1.28e-209	2.77e-208	NONE	RWDD4	201965
544.47	6.10452	0.197655	30.8848	1.91e-209	4.14e-208	UP	PI3	5266
204.156	-1.59853	0.0517711	-30.8769	2.44e-209	5.26e-208	NONE	IPPK	64768
86.5328	3.99787	0.129536	30.863	3.74e-209	8.07e-208	UP	PROC	5624
81.7422	3.253	0.105406	30.8616	3.91e-209	8.43e-208	UP	CENPK	64105
10849.4	-8.23089	0.266832	-30.8468	6.19e-209	1.33e-207	DOWN	AQP12B	653437
296.891	4.42933	0.143658	30.8325	9.62e-209	2.07e-207	UP	COL22A1	169044
52.3109	-4.26374	0.138303	-30.829	1.07e-208	2.3e-207	DOWN	CLEC18A	348174
4269.5	1.65095	0.0535533	30.8282	1.1e-208	2.36e-207	NONE	ARPC5	10092
99.4083	2.66972	0.08665	30.8104	1.9e-208	4.07e-207	UP	APOBEC3D	140564
35.1342	-4.9492	0.160879	-30.7636	8.05e-208	1.72e-206	DOWN	ANKRD62	342850
2336.63	2.67678	0.0870891	30.7362	1.87e-207	4e-206	UP	DKK3	27122
2611.28	-1.94174	0.0631924	-30.7274	2.45e-207	5.23e-206	NONE	PGM3	5238
154.142	6.2086	0.202112	30.7187	3.21e-207	6.83e-206	UP	SLC9A2	6549
300.674	-2.87729	0.0936847	-30.7124	3.88e-207	8.26e-206	DOWN	RAB43	339122
109.063	5.30752	0.172815	30.7121	3.92e-207	8.34e-206	UP	TNFSF11	8600
1095.16	-1.68856	0.0549974	-30.7025	5.27e-207	1.12e-205	NONE	TMEM150A	129303
3270.26	-2.28996	0.0745882	-30.7013	5.47e-207	1.16e-205	DOWN	SLC41A1	254428
319.177	2.6713	0.0870203	30.6975	6.15e-207	1.3e-205	UP	PLA2R1	22925
2462.56	2.05573	0.0669916	30.6864	8.65e-207	1.83e-205	UP	HK1	3098
216.076	2.62898	0.0856778	30.6844	9.18e-207	1.94e-205	UP	GIMAP2	26157
34570	-2.16083	0.0704319	-30.6797	1.06e-206	2.24e-205	DOWN	FTH1	2495
14218.2	3.39694	0.110765	30.6679	1.53e-206	3.22e-205	UP	AEBP1	165
113.594	-3.72492	0.121536	-30.6487	2.75e-206	5.79e-205	DOWN	IL12RB2	3595
1556.11	4.08939	0.13343	30.6482	2.79e-206	5.87e-205	UP	ISG15	9636
972.818	6.14696	0.200609	30.6415	3.43e-206	7.21e-205	UP	CDH17	1015
1031.32	2.45287	0.0800895	30.6266	5.42e-206	1.14e-204	UP	CDR2L	30850
171.554	3.78708	0.123658	30.6254	5.62e-206	1.18e-204	UP	P4HA3	283208
3898.38	2.72306	0.088919	30.6241	5.86e-206	1.23e-204	UP	TNFRSF21	27242
1837.08	1.77505	0.057984	30.6127	8.29e-206	1.73e-204	NONE	ZDHHC20	253832
32521.9	-2.30761	0.0753998	-30.605	1.05e-205	2.19e-204	DOWN	RPS3A	6189
377.315	2.75753	0.0901426	30.5908	1.62e-205	3.39e-204	UP	TSPAN5	10098
2728.53	3.20588	0.10482	30.5845	1.97e-205	4.1e-204	UP	BST2	684
1530.49	3.95737	0.129419	30.578	2.4e-205	4.99e-204	UP	COL7A1	1294
818.948	1.60267	0.0524243	30.5711	2.97e-205	6.18e-204	NONE	LRCH1	23143
599.278	5.49381	0.179728	30.5673	3.33e-205	6.92e-204	UP	SULT1B1	27284
240.014	4.04219	0.132297	30.5539	5.01e-205	1.04e-203	UP	SLAMF7	57823
166.946	4.45298	0.145822	30.5371	8.38e-205	1.74e-203	UP	PLA2G7	7941
753.831	4.64605	0.152145	30.5371	8.4e-205	1.74e-203	UP	PTGES	9536
194.546	5.98445	0.196026	30.5289	1.08e-204	2.23e-203	UP	CLRN3	119467
905.05	2.44721	0.0802392	30.4989	2.69e-204	5.56e-203	UP	RND3	390
481.672	3.51398	0.115242	30.4922	3.3e-204	6.82e-203	UP	GPC6	10082
3198.61	3.15462	0.103464	30.4902	3.51e-204	7.24e-203	UP	KLF5	688
180.3	3.25077	0.106658	30.4785	5.03e-204	1.04e-202	UP	HOXA3	3200
5059.3	2.20811	0.0724626	30.4724	6.05e-204	1.24e-202	UP	ARPC1B	10095
385.466	4.68519	0.153752	30.4724	6.05e-204	1.24e-202	UP	SFTA2	389376
91.3956	7.50392	0.246305	30.466	7.35e-204	1.51e-202	UP	CCL24	6369
559.869	-2.76263	0.0907116	-30.4551	1.02e-203	2.1e-202	DOWN	INPP5J	27124
26.0382	-5.21372	0.171198	-30.4543	1.05e-203	2.15e-202	DOWN	GOLGA8O	728047
995.423	2.04913	0.0673036	30.446	1.35e-203	2.77e-202	UP	TWSG1	57045
7281.35	3.31333	0.108839	30.4424	1.51e-203	3.08e-202	UP	LY6E	4061
146.029	4.36817	0.143504	30.4393	1.66e-203	3.39e-202	UP	HJURP	55355
1633.4	-2.45242	0.0805731	-30.4372	1.77e-203	3.61e-202	DOWN	PNPLA7	375775
5573.65	-3.56524	0.11716	-30.4306	2.17e-203	4.41e-202	DOWN	SLC43A1	8501
329.261	3.08556	0.101418	30.4241	2.64e-203	5.36e-202	UP	NUSAP1	51203
98.5847	2.7108	0.089182	30.3963	6.14e-203	1.25e-201	UP	FAM81A	145773
1987.42	1.55292	0.0511049	30.3868	8.2e-203	1.66e-201	NONE	ZNFX1	57169
190.94	4.57067	0.150443	30.3815	9.65e-203	1.96e-201	UP	SCUBE3	222663
122.143	4.22402	0.139084	30.3704	1.35e-202	2.74e-201	UP	PTHLH	5744
2611	1.91352	0.0630299	30.359	1.91e-202	3.87e-201	NONE	IFNGR2	3460
6425.8	3.81506	0.125699	30.3508	2.46e-202	4.96e-201	UP	TSPAN8	7103
8332.68	2.87226	0.0946403	30.3493	2.57e-202	5.18e-201	UP	ITGA3	3675
643.727	4.78175	0.157606	30.34	3.41e-202	6.87e-201	UP	NTM	50863
150.967	5.10872	0.168392	30.3382	3.6e-202	7.24e-201	UP	ADTRP	84830
363.713	11.9531	0.394025	30.3359	3.86e-202	7.76e-201	UP	MTRNR2L1	100462977
695.411	3.71133	0.122356	30.3323	4.31e-202	8.65e-201	UP	MROH6	642475
177.942	3.23649	0.10675	30.3185	6.53e-202	1.31e-200	UP	HOXB5	3215
967.337	-3.10702	0.102486	-30.3165	6.94e-202	1.39e-200	DOWN	AASS	10157
130.224	4.6712	0.154153	30.3023	1.07e-201	2.14e-200	UP	EDAR	10913
267.878	2.69191	0.0888791	30.2873	1.68e-201	3.36e-200	UP	RTP4	64108
494.955	-2.29102	0.0756598	-30.2806	2.06e-201	4.12e-200	DOWN	DBNDD2	55861
235.217	3.38399	0.111815	30.2641	3.41e-201	6.79e-200	UP	IGSF6	10261
1562.32	-1.757	0.0580742	-30.2544	4.57e-201	9.1e-200	NONE	GIT2	9815
3336.73	4.25186	0.140548	30.2521	4.9e-201	9.74e-200	UP	SLPI	6590
100.183	5.57375	0.184329	30.2381	7.48e-201	1.49e-199	UP	HTR1D	3352
607.948	2.26235	0.0748196	30.2374	7.64e-201	1.52e-199	UP	PLEKHG1	57480
63.4866	-8.7199	0.288383	-30.2372	7.69e-201	1.52e-199	DOWN	MAGED4	728239
446.033	4.54724	0.150406	30.233	8.72e-201	1.73e-199	UP	IQGAP3	128239
40.3176	3.24109	0.10726	30.217	1.41e-200	2.8e-199	UP	CENPI	2491
5982.89	-6.4969	0.215287	-30.1779	4.63e-200	9.14e-199	DOWN	GNMT	27232
2303.99	2.25275	0.0747261	30.1467	1.18e-199	2.34e-198	UP	CXCL16	58191
951.433	6.31903	0.209654	30.1402	1.44e-199	2.84e-198	UP	FAM3D	131177
1080.8	3.05556	0.101401	30.1335	1.77e-199	3.48e-198	UP	KCNK1	3775
1706.88	1.56136	0.0518553	30.1099	3.6e-199	7.08e-198	NONE	RALB	5899
35.4731	5.02676	0.16698	30.104	4.3e-199	8.45e-198	UP	DNAH3	55567
192.08	4.65276	0.154585	30.0983	5.09e-199	1e-197	UP	ESPN	83715
393.56	2.25481	0.0749237	30.0948	5.67e-199	1.11e-197	UP	MMD	23531
1567.15	1.73744	0.0577331	30.0944	5.74e-199	1.12e-197	NONE	RALA	5898
56.2077	8.13498	0.270418	30.0829	8.1e-199	1.59e-197	UP	MMP13	4322
1006.08	2.70199	0.089844	30.0743	1.05e-198	2.06e-197	UP	ABLIM3	22885
91.4114	-4.82666	0.160512	-30.0704	1.18e-198	2.31e-197	DOWN	CTAGE8	100142659
7435.4	2.72587	0.0906751	30.0619	1.52e-198	2.98e-197	UP	LGALS3	3958
1439.88	3.47489	0.115605	30.0583	1.7e-198	3.31e-197	UP	ADAM28	10863
1723.49	-1.64466	0.054746	-30.0416	2.81e-198	5.48e-197	NONE	PDPK1	5170
3374.38	1.84957	0.0615717	30.0394	3.01e-198	5.85e-197	NONE	LGMN	5641
44.3851	4.48511	0.149316	30.0377	3.16e-198	6.15e-197	UP	CDC25C	995
234.905	8.05656	0.268565	29.9985	1.03e-197	1.99e-196	UP	UGT1A10	54575
422.19	-4.07337	0.135792	-29.9972	1.07e-197	2.07e-196	DOWN	CPA4	51200
2941.31	1.6186	0.0539823	29.984	1.59e-197	3.07e-196	NONE	ATP6AP2	10159
2809.54	2.18225	0.0727885	29.9807	1.75e-197	3.39e-196	UP	CD82	3732
6419.31	1.59804	0.0533295	29.9653	2.78e-197	5.37e-196	NONE	ARPC2	10109
5763.32	6.29935	0.210283	29.9565	3.62e-197	6.99e-196	UP	TFF3	7033
136.466	7.30244	0.243778	29.9553	3.75e-197	7.24e-196	UP	GPR87	53836
163.872	4.03336	0.134795	29.9221	1.02e-196	1.95e-195	UP	SYNDIG1	79953
5324.42	-2.22881	0.0744966	-29.9182	1.14e-196	2.19e-195	DOWN	SIDT2	51092
5710.06	3.57278	0.119459	29.9079	1.55e-196	2.98e-195	UP	TGFBI	7045
680.472	3.2702	0.109422	29.886	2.99e-196	5.73e-195	UP	BASP1	10409
896.175	2.52513	0.0844921	29.886	2.99e-196	5.74e-195	UP	SLC7A7	9056
5168.22	2.70502	0.0905154	29.8847	3.11e-196	5.96e-195	UP	PALLD	23022
694.991	-1.76377	0.0590412	-29.8736	4.34e-196	8.3e-195	NONE	BBIP1	92482
779.519	2.13255	0.0714076	29.8645	5.69e-196	1.09e-194	UP	APOBEC3C	27350
2079.79	-1.62756	0.0545218	-29.8515	8.39e-196	1.6e-194	NONE	KLHDC2	23588
884.633	1.43018	0.0479169	29.8472	9.54e-196	1.82e-194	NONE	OSTF1	26578
337.726	-1.9503	0.0653954	-29.8232	1.96e-195	3.73e-194	NONE	ABCB6	10058
6590.6	1.47483	0.0494566	29.8207	2.11e-195	4.01e-194	NONE	YWHAB	7529
55143.3	2.24414	0.0752639	29.8169	2.36e-195	4.48e-194	UP	B2M	567
2216.05	-1.96331	0.0658636	-29.8088	3.01e-195	5.71e-194	NONE	CENPT	80152
59.8766	3.23498	0.108546	29.8029	3.58e-195	6.78e-194	UP	KIF18A	81930
61.6025	4.84344	0.162588	29.7897	5.31e-195	1.01e-193	UP	ZNF488	118738
191.713	-1.91202	0.0641897	-29.787	5.76e-195	1.09e-193	NONE	CYB5RL	606495
169.755	-2.21926	0.0745892	-29.753	1.58e-194	2.99e-193	DOWN	SRGAP2B	647135
1589.78	3.67494	0.123542	29.7463	1.93e-194	3.65e-193	UP	ASPN	54829
3453.18	-2.78686	0.0936931	-29.7446	2.04e-194	3.84e-193	DOWN	PLEKHH3	79990
292.41	-1.45988	0.0490929	-29.737	2.55e-194	4.81e-193	NONE	TIMM23B	100652748
1613.11	-1.81474	0.0610532	-29.7239	3.77e-194	7.1e-193	NONE	UPF3A	65110
88.6212	4.22255	0.142069	29.7218	4.02e-194	7.55e-193	UP	SLC7A4	6545
27.7264	-3.90302	0.131376	-29.7089	5.9e-194	1.11e-192	DOWN	TRIM74	378108
3369.18	7.26434	0.244576	29.7017	7.29e-194	1.37e-192	UP	PSCA	8000
359.411	2.64644	0.0891766	29.6765	1.55e-193	2.9e-192	UP	PLK1	5347
1097.11	1.50998	0.0508941	29.6691	1.92e-193	3.6e-192	NONE	ANP32E	81611
4877.76	2.88516	0.0972944	29.6539	3.02e-193	5.66e-192	UP	HMGA1	3159
133.667	1.53829	0.0518824	29.6495	3.44e-193	6.43e-192	NONE	EFCAB11	90141
1803.1	2.34843	0.0792169	29.6456	3.87e-193	7.23e-192	UP	STMN1	3925
2576.67	3.02425	0.102081	29.6261	6.88e-193	1.28e-191	UP	CAPN5	726
2628.01	2.02109	0.068242	29.6165	9.16e-193	1.71e-191	UP	B4GALT5	9334
113.512	3.64634	0.123125	29.6151	9.56e-193	1.78e-191	UP	GTSE1	51512
605.019	2.54771	0.0861046	29.5885	2.1e-192	3.91e-191	UP	ROBO1	6091
148.448	-1.98022	0.0669265	-29.5881	2.13e-192	3.96e-191	NONE	KCNMB3	27094
948.798	1.99679	0.0675253	29.571	3.53e-192	6.54e-191	NONE	DNTTIP1	116092
62.5491	3.95022	0.133591	29.5694	3.7e-192	6.85e-191	UP	HSD17B6	8630
1425.31	2.94641	0.0996499	29.5676	3.9e-192	7.22e-191	UP	ADAM8	101
149.985	4.04104	0.136679	29.5658	4.11e-192	7.6e-191	UP	ZNF365	22891
99.9268	-2.36967	0.080156	-29.5632	4.44e-192	8.21e-191	DOWN	LHX4	89884
1074.45	-4.7412	0.160375	-29.5632	4.45e-192	8.21e-191	DOWN	COCH	1690
119.232	-1.88413	0.0637431	-29.5582	5.16e-192	9.52e-191	NONE	ZNF763	284390
14913.3	2.46266	0.0833874	29.5328	1.09e-191	2.01e-190	UP	COL4A2	1284
125.622	3.02691	0.102499	29.531	1.15e-191	2.12e-190	UP	FABP3	2170
157.348	7.60828	0.257834	29.5084	2.25e-191	4.13e-190	UP	FIBCD1	84929
4106.36	-2.45269	0.0831382	-29.5014	2.76e-191	5.08e-190	DOWN	TP53INP1	94241
127.623	2.76549	0.0938087	29.4801	5.18e-191	9.5e-190	UP	HHIPL1	84439
3260.83	4.15384	0.140939	29.4727	6.44e-191	1.18e-189	UP	S100A14	57402
2841.27	-2.51232	0.0852476	-29.4709	6.81e-191	1.25e-189	DOWN	PPP2R2D	55844
382.404	5.73407	0.194577	29.4694	7.11e-191	1.3e-189	UP	CD79A	973
80.0171	7.15352	0.242756	29.468	7.41e-191	1.35e-189	UP	BIRC7	79444
212.078	4.60296	0.15626	29.457	1.02e-190	1.87e-189	UP	ANKS4B	257629
269.078	-3.35198	0.113819	-29.4501	1.26e-190	2.29e-189	DOWN	CCDC110	256309
1006.84	2.62328	0.0890916	29.4447	1.47e-190	2.68e-189	UP	LOXL1	4016
45.7085	3.20689	0.108925	29.4413	1.63e-190	2.96e-189	UP	ZNF860	344787
20117.5	-2.91468	0.0990102	-29.4382	1.78e-190	3.24e-189	DOWN	SEL1L	6400
170.805	3.13119	0.106372	29.4363	1.88e-190	3.42e-189	UP	PTGER2	5732
94.6525	5.01746	0.170515	29.4254	2.6e-190	4.72e-189	UP	CHST6	4166
1909.86	-1.62284	0.0551763	-29.4119	3.86e-190	7.01e-189	NONE	PGAM1	5223
746.308	-1.67076	0.056806	-29.4116	3.91e-190	7.08e-189	NONE	ZNF700	90592
93.1947	4.59451	0.156217	29.4112	3.95e-190	7.16e-189	UP	TIGIT	201633
166.221	2.73708	0.0931316	29.3893	7.51e-190	1.36e-188	UP	HPSE	10855
14488.3	3.2463	0.11049	29.3809	9.64e-190	1.74e-188	UP	TIMP1	7076
67.4815	4.05043	0.13786	29.3807	9.69e-190	1.75e-188	UP	MYB	4602
934.277	2.51883	0.0857367	29.3787	1.03e-189	1.85e-188	UP	PLEKHO1	51177
86.9651	3.56621	0.121401	29.3754	1.13e-189	2.04e-188	UP	TTK	7272
13289.3	-2.27446	0.0774577	-29.3639	1.59e-189	2.86e-188	DOWN	PABPC4	8761
969.022	3.17729	0.108207	29.3631	1.63e-189	2.92e-188	UP	PLEK2	26499
487.805	-1.93232	0.0658196	-29.3579	1.9e-189	3.4e-188	NONE	ZNF493	284443
236.78	4.80847	0.163795	29.3567	1.96e-189	3.52e-188	UP	CALB2	794
2014.78	2.70308	0.0920843	29.3544	2.1e-189	3.77e-188	UP	PXDN	7837
136.998	5.30664	0.180806	29.3499	2.39e-189	4.29e-188	UP	LGR5	8549
55.381	4.8189	0.164223	29.3436	2.88e-189	5.16e-188	UP	KPNA7	402569
52.0562	3.66449	0.124898	29.3398	3.22e-189	5.76e-188	UP	ABCB4	5244
93.3142	4.99342	0.170243	29.3311	4.17e-189	7.44e-188	UP	TMEM150B	284417
140.414	4.16066	0.141918	29.3174	6.23e-189	1.11e-187	UP	NDNF	79625
267.393	2.09803	0.0715828	29.3092	7.92e-189	1.41e-187	UP	NUDT1	4521
511.456	4.28804	0.146342	29.3014	9.95e-189	1.77e-187	UP	CD52	1043
19172.8	-2.64963	0.0904353	-29.2987	1.08e-188	1.92e-187	DOWN	MAT2A	4144
55.4996	6.72236	0.229536	29.2868	1.53e-188	2.72e-187	UP	NOX1	27035
114.899	3.81949	0.130419	29.2863	1.55e-188	2.75e-187	UP	ARSI	340075
190.343	4.31465	0.147455	29.2609	3.27e-188	5.79e-187	UP	FAM83D	81610
230.069	-2.94972	0.100822	-29.2568	3.68e-188	6.52e-187	DOWN	GTF2H2	2966
999.995	2.97702	0.101784	29.2485	4.69e-188	8.31e-187	UP	AMIGO2	347902
40.8374	-2.13063	0.0728465	-29.2482	4.73e-188	8.37e-187	DOWN	ZNF20	7568
2418.04	1.93874	0.0662901	29.2462	5.01e-188	8.86e-187	NONE	DPYSL2	1808
159.24	2.92237	0.0999253	29.2455	5.12e-188	9.03e-187	UP	RMI2	116028
292.704	2.16096	0.073929	29.2302	8.02e-188	1.41e-186	UP	CKAP2	26586
278.2	4.27197	0.146249	29.2102	1.44e-187	2.53e-186	UP	ADAMTS14	140766
76.4645	5.23639	0.179363	29.1943	2.29e-187	4.03e-186	UP	HCAR1	27198
2535.75	4.35388	0.149186	29.1842	3.08e-187	5.41e-186	UP	TMC5	79838
87.4522	8.37699	0.287072	29.1808	3.4e-187	5.97e-186	UP	APOBEC1	339
75.669	4.42099	0.151512	29.1791	3.57e-187	6.27e-186	UP	DKK2	27123
291.791	3.93282	0.134835	29.1676	4.99e-187	8.75e-186	UP	CDH2	1000
950.367	-1.61278	0.0553049	-29.1616	5.95e-187	1.04e-185	NONE	RALGAPA1	253959
4848.13	3.13814	0.107627	29.1576	6.7e-187	1.17e-185	UP	HLA-DPA1	3113
88.1553	2.72787	0.0936306	29.1344	1.32e-186	2.3e-185	UP	BLM	641
631.806	2.65457	0.0911513	29.1227	1.85e-186	3.24e-185	UP	GPSM3	63940
2579.06	1.42271	0.0488599	29.1181	2.12e-186	3.7e-185	NONE	MOB1A	55233
32.9264	-5.47543	0.188068	-29.1141	2.38e-186	4.15e-185	DOWN	C1QTNF3-AMACR	100534612
2579.12	-1.76624	0.0606793	-29.1078	2.86e-186	4.97e-185	NONE	CXXC1	30827
1822.51	-2.84265	0.0976817	-29.1011	3.48e-186	6.04e-185	DOWN	CERS4	79603
43.8277	6.60976	0.227211	29.0908	4.69e-186	8.14e-185	UP	CD1A	909
394.801	1.6996	0.0584248	29.0903	4.76e-186	8.25e-185	NONE	RP2	6102
668.173	1.78884	0.0614991	29.0872	5.22e-186	9.04e-185	NONE	MCM6	4175
51.844	4.02455	0.138371	29.0851	5.53e-186	9.58e-185	UP	CENPA	1058
4876.32	4.43836	0.152626	29.08	6.43e-186	1.11e-184	UP	GPX2	2877
890.552	-1.67321	0.0575524	-29.0729	7.91e-186	1.37e-184	NONE	TUT1	64852
6.76301	-4.95916	0.170588	-29.0709	8.38e-186	1.45e-184	DOWN	NPIPB8	728734
539.621	1.57757	0.054267	29.0705	8.47e-186	1.46e-184	NONE	RILPL2	196383
66.9918	2.37204	0.0815997	29.0693	8.78e-186	1.51e-184	UP	PARPBP	55010
213.225	1.65734	0.0570278	29.062	1.08e-185	1.87e-184	NONE	MREG	55686
349.399	6.01359	0.207019	29.0485	1.61e-185	2.77e-184	UP	ANXA13	312
272.209	-3.96849	0.136663	-29.0386	2.15e-185	3.69e-184	DOWN	NPIPA5	100288332
778.83	3.76441	0.12965	29.0351	2.38e-185	4.08e-184	UP	BAIAP2L2	80115
771.232	-1.52049	0.0523729	-29.0319	2.6e-185	4.46e-184	NONE	RABL2B	11158
3212.19	4.50372	0.155183	29.022	3.48e-185	5.95e-184	UP	SFRP4	6424
101.815	-1.81786	0.062693	-28.9963	7.33e-185	1.25e-183	NONE	ZNF658	26149
3547.33	1.49969	0.0517231	28.9946	7.71e-185	1.32e-183	NONE	RAB11A	8766
1228.66	-4.87566	0.168158	-28.9945	7.72e-185	1.32e-183	DOWN	ARHGDIG	398
1625.62	2.25918	0.0779339	28.9884	9.22e-185	1.57e-183	UP	UNC5B	219699
12029	5.17309	0.178466	28.9863	9.79e-185	1.67e-183	UP	AGR2	10551
983.688	1.78039	0.061429	28.9829	1.08e-184	1.84e-183	NONE	RNF19B	127544
1883.35	1.58078	0.0545561	28.9753	1.35e-184	2.3e-183	NONE	SPTLC2	9517
849.512	-2.06079	0.0711481	-28.9648	1.83e-184	3.11e-183	DOWN	TIFA	92610
448.809	-1.81595	0.0627526	-28.9383	3.94e-184	6.68e-183	NONE	CCZ1B	221960
530.242	-2.60336	0.0899852	-28.931	4.87e-184	8.26e-183	DOWN	RTEL1-TNFRSF6B	100533107
2664.4	4.1523	0.143566	28.9226	6.21e-184	1.05e-182	UP	HLA-DQB1	3119
2888.97	-4.0543	0.140245	-28.9087	9.28e-184	1.57e-182	DOWN	PAIP2B	400961
473.897	-1.73574	0.0600426	-28.9085	9.32e-184	1.58e-182	NONE	RWDD2A	112611
1302.93	1.905	0.0659209	28.8982	1.26e-183	2.13e-182	NONE	ENDOD1	23052
349.719	-2.3691	0.0819975	-28.8923	1.49e-183	2.51e-182	DOWN	FIGN	55137
4246.84	2.56041	0.0887047	28.8645	3.34e-183	5.63e-182	UP	ADAM9	8754
215.885	5.20676	0.180396	28.8629	3.49e-183	5.87e-182	UP	IDO1	3620
575.001	1.80679	0.0626129	28.8564	4.21e-183	7.08e-182	NONE	PARP3	10039
363.209	2.0649	0.0715795	28.8477	5.42e-183	9.11e-182	UP	KCTD17	79734
2229.22	2.85629	0.0990424	28.839	6.95e-183	1.17e-181	UP	PLXDC2	84898
99.5627	4.00808	0.139021	28.8308	8.81e-183	1.48e-181	UP	CDC45	8318
3603.36	-1.94207	0.0673722	-28.826	1.01e-182	1.7e-181	NONE	TUBGCP6	85378
2142.86	2.02393	0.0702191	28.823	1.11e-182	1.85e-181	UP	ITGA1	3672
7318.14	-2.92103	0.101389	-28.8102	1.6e-182	2.68e-181	DOWN	BACE1	23621
355.022	3.55253	0.123315	28.8087	1.67e-182	2.79e-181	UP	SLC22A3	6581
916.189	-1.75516	0.0609251	-28.8085	1.68e-182	2.81e-181	NONE	POLI	11201
79.4425	5.58845	0.194077	28.795	2.48e-182	4.14e-181	UP	HOXA10	3206
57.9626	3.90923	0.135831	28.7801	3.81e-182	6.35e-181	UP	MCM10	55388
147.786	3.57952	0.124394	28.7756	4.33e-182	7.21e-181	UP	DOK5	55816
1493.92	2.60179	0.0904265	28.7724	4.76e-182	7.91e-181	UP	AXL	558
22457.6	2.34772	0.0816534	28.7523	8.48e-182	1.41e-180	UP	HLA-C	3107
243.594	2.88281	0.100266	28.7516	8.65e-182	1.44e-180	UP	FAR2	55711
116.209	3.67917	0.12797	28.7502	9e-182	1.49e-180	UP	MSX2	4488
1570.76	-4.13893	0.144065	-28.7295	1.63e-181	2.71e-180	DOWN	CSDC2	27254
4167.92	3.34408	0.116401	28.7289	1.66e-181	2.75e-180	UP	THY1	7070
243.686	4.28803	0.149291	28.7227	1.99e-181	3.29e-180	UP	NPTX1	4884
37787.9	-1.87236	0.0652482	-28.6959	4.29e-181	7.1e-180	NONE	SRRM2	23524
131.231	3.99394	0.13919	28.6941	4.52e-181	7.46e-180	UP	AURKB	9212
1489.32	-1.85463	0.0646462	-28.689	5.23e-181	8.63e-180	NONE	LRCH4	4034
140.47	3.46842	0.120903	28.6876	5.44e-181	8.97e-180	UP	BUB1B	701
84.3481	6.75917	0.235712	28.6756	7.7e-181	1.27e-179	UP	ZBED2	79413
162.236	1.9557	0.0682019	28.6752	7.79e-181	1.28e-179	NONE	MB21D2	151963
686.25	4.09459	0.142793	28.675	7.81e-181	1.28e-179	UP	PHLDA2	7262
124.05	5.48474	0.191457	28.6474	1.73e-180	2.84e-179	UP	FAM177B	400823
24.1294	-7.12332	0.248904	-28.6187	3.93e-180	6.46e-179	DOWN	CYP11B1	1584
135.352	4.88901	0.170875	28.6116	4.81e-180	7.89e-179	UP	NEK2	4751
123.919	-4.47538	0.15643	-28.6094	5.14e-180	8.41e-179	DOWN	FBXW12	285231
101.514	-5.09618	0.178163	-28.6039	6e-180	9.82e-179	DOWN	PRODH2	58510
243.248	-6.6846	0.233787	-28.5928	8.27e-180	1.35e-178	DOWN	HBA1	3039
613.047	3.04864	0.106655	28.5842	1.06e-179	1.73e-178	UP	TBXAS1	6916
1907.1	-2.08251	0.0728784	-28.5751	1.37e-179	2.23e-178	DOWN	EIF2AK3	9451
42.8435	-3.24592	0.113593	-28.5751	1.37e-179	2.24e-178	DOWN	NUTM2B	729262
530.407	3.39681	0.118941	28.5588	2.18e-179	3.56e-178	UP	CCL5	6352
24.634	-2.53407	0.0888436	-28.5229	6.1e-179	9.93e-178	DOWN	OXCT2	64064
567.64	3.19084	0.111874	28.5217	6.3e-179	1.02e-177	UP	AK4	205
103.149	3.5831	0.125677	28.5104	8.7e-179	1.41e-177	UP	GZMA	3001
565.263	1.75684	0.0616212	28.5103	8.73e-179	1.42e-177	NONE	NMI	9111
1628.91	-1.95153	0.0684865	-28.4951	1.35e-178	2.18e-177	NONE	MAST3	23031
144.748	3.10583	0.109006	28.4922	1.46e-178	2.37e-177	UP	CAMK4	814
556.611	-1.89895	0.0666734	-28.4815	1.99e-178	3.22e-177	NONE	ZNF10	7556
559.907	3.18781	0.111945	28.4765	2.29e-178	3.71e-177	UP	CDKN2B	1030
20.9715	-2.49784	0.0877666	-28.46	3.67e-178	5.92e-177	DOWN	GOLGA8H	728498
192.78	-1.76724	0.0621031	-28.4565	4.05e-178	6.54e-177	NONE	ZNF433	163059
1450.43	2.92353	0.102795	28.4404	6.41e-178	1.03e-176	UP	LIPH	200879
4748.71	3.82877	0.134665	28.4319	8.16e-178	1.32e-176	UP	IFI6	2537
540.004	-2.30568	0.0811281	-28.4203	1.14e-177	1.83e-176	DOWN	STOX2	56977
749.5	-2.44604	0.0860694	-28.4194	1.16e-177	1.87e-176	DOWN	IRF9	10379
859.268	-2.82182	0.0992971	-28.4179	1.21e-177	1.95e-176	DOWN	CDH23	64072
35.918	3.74662	0.131861	28.4135	1.38e-177	2.21e-176	UP	MND1	84057
542.798	3.20306	0.11274	28.411	1.48e-177	2.37e-176	UP	HMCN1	83872
263.769	-1.17868	0.04149	-28.4089	1.57e-177	2.52e-176	NONE	ZSCAN21	7589
1832.2	2.08871	0.0735524	28.3976	2.16e-177	3.47e-176	UP	PSMB8	5696
86.166	4.02538	0.141776	28.3926	2.49e-177	3.99e-176	UP	ZBP1	81030
1607.64	2.53374	0.0892572	28.3869	2.93e-177	4.69e-176	UP	ALDH3B1	221
4555.03	-2.10675	0.0742269	-28.3826	3.31e-177	5.29e-176	DOWN	ECHDC2	55268
320.418	2.78113	0.0979902	28.3817	3.4e-177	5.42e-176	UP	UBXN10	127733
36.4756	7.77117	0.273854	28.377	3.89e-177	6.2e-176	UP	CST4	1472
592.869	2.92373	0.103044	28.3735	4.29e-177	6.84e-176	UP	GPR153	387509
4382.28	1.68592	0.05947	28.3492	8.57e-177	1.37e-175	NONE	PEA15	8682
668.069	1.91241	0.0674604	28.3487	8.69e-177	1.38e-175	NONE	BCL10	8915
2349.96	1.80921	0.0638374	28.3409	1.08e-176	1.72e-175	NONE	CORO1C	23603
233.324	3.3813	0.119359	28.3288	1.53e-176	2.42e-175	UP	PODNL1	79883
262.868	4.67897	0.16522	28.3197	1.98e-176	3.14e-175	UP	PHACTR3	116154
237.027	5.41812	0.191377	28.3113	2.51e-176	3.98e-175	UP	MIA	8190
197.891	3.50665	0.123904	28.3013	3.33e-176	5.27e-175	UP	SAPCD2	89958
2209.74	1.76081	0.0622185	28.3005	3.41e-176	5.39e-175	NONE	MAPK3	5595
630.779	4.00605	0.141574	28.2964	3.82e-176	6.04e-175	UP	NPC1L1	29881
327.971	4.3146	0.152517	28.2893	4.68e-176	7.4e-175	UP	CYP4F3	4051
1403.1	2.7739	0.0980757	28.2833	5.55e-176	8.76e-175	UP	UCP2	7351
191.051	2.78376	0.0984462	28.2769	6.64e-176	1.05e-174	UP	KIF23	9493
281.541	-3.36961	0.119166	-28.2767	6.69e-176	1.05e-174	DOWN	GSTT2B	653689
982.514	2.15646	0.0763279	28.2526	1.32e-175	2.08e-174	UP	OSBPL3	26031
1594.49	-2.18477	0.0773419	-28.2482	1.5e-175	2.36e-174	DOWN	PDK2	5164
159.382	-3.83494	0.13578	-28.2437	1.7e-175	2.67e-174	DOWN	GPR150	285601
89.038	2.39805	0.0849058	28.2437	1.7e-175	2.67e-174	UP	PLK4	10733
43.333	6.6233	0.234551	28.2382	1.99e-175	3.12e-174	UP	EFNA2	1943
2687.2	-2.13592	0.0756437	-28.2366	2.08e-175	3.26e-174	DOWN	SLC25A22	79751
289.195	1.40119	0.0496451	28.2242	2.95e-175	4.62e-174	NONE	RABIF	5877
13745.5	-2.37659	0.0842056	-28.2236	3e-175	4.7e-174	DOWN	RPS10	6204
668.544	-2.57152	0.0911231	-28.2203	3.3e-175	5.16e-174	DOWN	MST1	4485
1141.05	4.17315	0.147886	28.2187	3.45e-175	5.38e-174	UP	APOC1	341
1255.79	-2.82102	0.0999701	-28.2187	3.45e-175	5.39e-174	DOWN	ECE2	9718
856.417	2.13636	0.0757183	28.2145	3.88e-175	6.05e-174	UP	FGD5	152273
11.9094	5.66868	0.200961	28.2078	4.69e-175	7.3e-174	UP	S100A5	6276
4023.8	3.90781	0.13862	28.1907	7.6e-175	1.18e-173	UP	S100A4	6275
515.224	-1.42706	0.0506469	-28.1766	1.13e-174	1.76e-173	NONE	TRMT13	54482
146.185	-2.59777	0.0921977	-28.1761	1.15e-174	1.78e-173	DOWN	FAM86B1	85002
155.882	3.69101	0.131021	28.1711	1.32e-174	2.05e-173	UP	TPRG1	285386
493.675	2.55079	0.0905561	28.1681	1.44e-174	2.23e-173	UP	LY75	4065
245.314	4.75948	0.168996	28.1632	1.65e-174	2.56e-173	UP	LGR6	59352
499.481	4.13861	0.146953	28.1628	1.67e-174	2.58e-173	UP	CENPF	1063
86.7356	3.05318	0.108423	28.1599	1.81e-174	2.8e-173	UP	IL12RB1	3594
114.963	3.38919	0.12042	28.1448	2.77e-174	4.28e-173	UP	TNFSF15	9966
235.405	3.21146	0.114112	28.1431	2.91e-174	4.49e-173	UP	CD86	942
1113.37	1.6405	0.0583016	28.1381	3.35e-174	5.17e-173	NONE	SGCB	6443
324.07	5.49262	0.195217	28.136	3.56e-174	5.48e-173	UP	MYO1A	4640
26.5691	5.01522	0.178253	28.1354	3.61e-174	5.56e-173	UP	NPFFR1	64106
1331.27	2.86912	0.101975	28.1354	3.61e-174	5.56e-173	UP	ANGPTL2	23452
3568.16	1.57921	0.0561385	28.1306	4.14e-174	6.37e-173	NONE	MPZL1	9019
1024.31	4.40812	0.15674	28.1237	5.02e-174	7.72e-173	UP	VSTM2L	128434
977.31	-1.69403	0.0602411	-28.1208	5.46e-174	8.37e-173	NONE	TBC1D24	57465
740.54	3.05929	0.1088	28.1186	5.81e-174	8.9e-173	UP	PDLIM4	8572
6261.67	2.67851	0.0952859	28.1103	7.33e-174	1.12e-172	UP	SERPINH1	871
5956.86	1.84973	0.0658207	28.1026	9.1e-174	1.39e-172	NONE	CTSZ	1522
5209.78	1.59403	0.0567472	28.0901	1.3e-173	1.98e-172	NONE	ACTR2	10097
279.181	5.0019	0.178071	28.0894	1.32e-173	2.02e-172	UP	ALDH3A1	218
256.646	1.86357	0.0663635	28.0813	1.66e-173	2.53e-172	NONE	EIF5A2	56648
2414.77	-2.35002	0.0837143	-28.0719	2.16e-173	3.3e-172	DOWN	RAB3D	9545
2041.95	1.82244	0.0649229	28.0709	2.22e-173	3.39e-172	NONE	EHD1	10938
186.056	3.27068	0.116543	28.0643	2.68e-173	4.08e-172	UP	SUGCT	79783
109.125	2.71668	0.0968254	28.0576	3.23e-173	4.92e-172	UP	GINS1	9837
619.649	2.07694	0.0740357	28.0532	3.65e-173	5.55e-172	UP	PTPRE	5791
202.16	-1.7002	0.0606529	-28.0317	6.68e-173	1.01e-171	NONE	ZNF782	158431
9768.13	-3.40654	0.121554	-28.0248	8.1e-173	1.23e-171	DOWN	TPST2	8459
442.943	2.36807	0.0845078	28.0219	8.8e-173	1.34e-171	UP	CD58	965
1210.16	-1.53319	0.0547164	-28.0207	9.1e-173	1.38e-171	NONE	PSMA6	5687
949.793	2.53239	0.0903871	28.0171	1.01e-172	1.52e-171	UP	RAB34	83871
100.175	3.78253	0.135047	28.0089	1.27e-172	1.92e-171	UP	SNCAIP	9627
213.2	3.51405	0.125467	28.0077	1.31e-172	1.98e-171	UP	BANK1	55024
4423.7	2.3646	0.0844358	28.0047	1.43e-172	2.15e-171	UP	CSTB	1476
9157.09	1.63412	0.0583611	28.0001	1.62e-172	2.44e-171	NONE	PTTG1IP	754
1759.42	2.10084	0.075072	27.9843	2.53e-172	3.81e-171	UP	DUSP6	1848
96.2897	3.46937	0.124037	27.9704	3.72e-172	5.61e-171	UP	KCND2	3751
28206.7	2.4067	0.08605	27.9686	3.91e-172	5.89e-171	UP	ANXA2	302
80.0633	6.01809	0.215185	27.967	4.09e-172	6.15e-171	UP	SERPINB7	8710
1402.82	1.25342	0.0448309	27.9588	5.15e-172	7.74e-171	NONE	TFDP1	7027
1131.96	1.52073	0.0544046	27.9523	6.19e-172	9.29e-171	NONE	ACVR1	90
2224.98	-5.33138	0.19077	-27.9466	7.24e-172	1.09e-170	DOWN	BHLHA15	168620
16.7163	-7.11291	0.25452	-27.9464	7.29e-172	1.09e-170	DOWN	ZNF804B	219578
1922.91	-4.76026	0.17049	-27.921	1.48e-171	2.22e-170	DOWN	TMEM52	339456
155.727	-2.25079	0.0806133	-27.9208	1.49e-171	2.23e-170	DOWN	LTB4R2	56413
975.274	-2.97961	0.106757	-27.9101	2.01e-171	3.01e-170	DOWN	MRPS24	64951
4612.38	3.21349	0.115145	27.9083	2.12e-171	3.16e-170	UP	CD55	1604
91.0889	2.76936	0.0992348	27.9071	2.19e-171	3.26e-170	UP	RAD51AP1	10635
55.5737	7.89006	0.282848	27.895	3.07e-171	4.57e-170	UP	C11orf86	254439
1513.93	3.10246	0.111221	27.8945	3.11e-171	4.63e-170	UP	MST1R	4486
358.095	1.85947	0.066673	27.8894	3.58e-171	5.33e-170	NONE	E2F3	1871
749.64	-1.89655	0.0680066	-27.8878	3.76e-171	5.59e-170	NONE	NBPF1	55672
146.637	4.1374	0.148366	27.8864	3.91e-171	5.8e-170	UP	TWIST1	7291
120.029	2.82618	0.101398	27.8722	5.79e-171	8.6e-170	UP	NAGS	162417
1716.24	2.96175	0.106263	27.8719	5.84e-171	8.66e-170	UP	LOXL2	4017
71.5408	3.20952	0.115154	27.8715	5.91e-171	8.76e-170	UP	MEI1	150365
1147.9	-1.83864	0.0659745	-27.869	6.34e-171	9.39e-170	NONE	SOCS7	30837
109.062	4.81594	0.172862	27.86	8.14e-171	1.21e-169	UP	SUCNR1	56670
329.901	1.78472	0.0640695	27.8559	9.13e-171	1.35e-169	NONE	CNPY4	245812
5125.56	-1.70197	0.0611237	-27.8447	1.25e-170	1.84e-169	NONE	GGA2	23062
602.41	2.13412	0.0766913	27.8274	2.02e-170	2.99e-169	UP	CACNB3	784
275.756	-2.73057	0.0981369	-27.8241	2.22e-170	3.27e-169	DOWN	ARHGAP8	23779
1100.81	2.4471	0.0879611	27.8202	2.47e-170	3.64e-169	UP	TOR4A	54863
145.658	-3.68632	0.132635	-27.7929	5.28e-170	7.77e-169	DOWN	FITM1	161247
365.475	-1.87033	0.0673054	-27.7887	5.95e-170	8.75e-169	NONE	MTHFS	10588
110.161	3.5322	0.127138	27.7824	7.09e-170	1.04e-168	UP	SPC24	147841
87.9934	4.59245	0.165332	27.7771	8.2e-170	1.21e-168	UP	TBX15	6913
1463.06	1.49416	0.0538274	27.7582	1.39e-169	2.03e-168	NONE	PPP3CA	5530
949.954	2.08706	0.0752062	27.7512	1.68e-169	2.47e-168	UP	IFI35	3430
521.018	-2.19113	0.0789735	-27.7451	2e-169	2.93e-168	DOWN	PPAN	56342
255.903	3.13144	0.112902	27.736	2.57e-169	3.77e-168	UP	SPN	6693
43.1282	4.37092	0.157748	27.7083	5.55e-169	8.12e-168	UP	CATSPER1	117144
36.9977	3.38449	0.122158	27.7058	5.94e-169	8.69e-168	UP	TMEM26	219623
1474.51	-2.74293	0.099003	-27.7056	5.99e-169	8.74e-168	DOWN	CHRD	8646
200.865	3.09045	0.111592	27.6941	8.22e-169	1.2e-167	UP	IL2RB	3560
687.018	2.45683	0.0887148	27.6936	8.34e-169	1.22e-167	UP	MAP1A	4130
25.2181	-4.66836	0.168625	-27.6849	1.06e-168	1.55e-167	DOWN	MUSTN1	389125
64.5707	3.71622	0.134235	27.6845	1.07e-168	1.56e-167	UP	CXCR3	2833
2256.82	-4.21065	0.152102	-27.6831	1.12e-168	1.62e-167	DOWN	P2RX1	5023
17.6176	3.5683	0.128907	27.6811	1.18e-168	1.71e-167	UP	DLEU7	220107
669.549	-1.5556	0.0562138	-27.6729	1.48e-168	2.15e-167	NONE	ZNF224	7767
118.985	3.89751	0.14085	27.6714	1.54e-168	2.24e-167	UP	CD3D	915
48.1163	4.0785	0.147436	27.6629	1.95e-168	2.84e-167	UP	TNFRSF9	3604
503.914	-1.87476	0.0677868	-27.6567	2.32e-168	3.36e-167	NONE	COQ10A	93058
988.784	6.70923	0.242632	27.6519	2.65e-168	3.83e-167	UP	VSIG1	340547
1964.66	3.56759	0.129018	27.6519	2.65e-168	3.83e-167	UP	CXCR4	7852
2367.12	-2.86885	0.103789	-27.6413	3.55e-168	5.14e-167	DOWN	ALDH1L2	160428
3244.92	2.22791	0.0806032	27.6404	3.64e-168	5.25e-167	UP	PRSS23	11098
1329.56	-2.13472	0.0772938	-27.6182	6.72e-168	9.7e-167	DOWN	NPEPL1	79716
5422.66	-1.83543	0.0664687	-27.6135	7.67e-168	1.11e-166	NONE	VPS51	738
469.247	5.31941	0.19268	27.6075	9.05e-168	1.3e-166	UP	HLA-DQA2	3118
434.278	1.85024	0.0670217	27.6066	9.27e-168	1.34e-166	NONE	MLLT3	4300
3107.17	2.73749	0.0992086	27.5932	1.34e-167	1.93e-166	UP	MRC2	9902
601.116	1.87468	0.0679465	27.5905	1.45e-167	2.08e-166	NONE	LXN	56925
25.3325	4.64758	0.168489	27.5839	1.73e-167	2.49e-166	UP	DNAJC5B	85479
5163.35	6.9422	0.251767	27.5739	2.29e-167	3.28e-166	UP	MMP1	4312
1108.24	1.14706	0.0416052	27.5701	2.54e-167	3.65e-166	NONE	RB1	5925
661.968	2.90767	0.105491	27.5632	3.08e-167	4.41e-166	UP	SSC5D	284297
3281.34	2.65875	0.0964724	27.5597	3.39e-167	4.86e-166	UP	MXRA8	54587
43.2252	3.51414	0.12754	27.5533	4.04e-167	5.78e-166	UP	GABRD	2563
1669.91	2.15154	0.0781135	27.5437	5.27e-167	7.53e-166	UP	RRAS	6237
327.349	2.95701	0.10737	27.5404	5.76e-167	8.23e-166	UP	VAV1	7409
629.323	2.01777	0.0732793	27.5353	6.63e-167	9.47e-166	UP	LDLRAD4	753
791.281	2.17215	0.0789049	27.5287	7.95e-167	1.13e-165	UP	LPCAT2	54947
96.6716	8.10841	0.294596	27.5238	9.11e-167	1.3e-165	UP	HOXA13	3209
15.077	5.42904	0.19738	27.5055	1.51e-166	2.15e-165	UP	FLRT1	23769
619.558	-2.06627	0.0751254	-27.5043	1.56e-166	2.22e-165	DOWN	B3GALNT2	148789
2183.19	2.48149	0.0902367	27.4997	1.77e-166	2.51e-165	UP	TSPAN15	23555
33.8477	6.12858	0.222875	27.4979	1.86e-166	2.64e-165	UP	ST8SIA2	8128
10319.6	2.00717	0.0730201	27.488	2.44e-166	3.47e-165	UP	JUP	3728
38.7066	4.69648	0.170897	27.4813	2.94e-166	4.17e-165	UP	HECW1	23072
388.653	-2.40392	0.0874879	-27.4772	3.29e-166	4.66e-165	DOWN	ZNF593	51042
17977	4.39385	0.159927	27.4741	3.58e-166	5.07e-165	UP	LYZ	4069
20.522	4.1516	0.151128	27.4708	3.93e-166	5.56e-165	UP	NEIL3	55247
183.31	5.17956	0.188571	27.4674	4.3e-166	6.08e-165	UP	FGFBP1	9982
105.723	6.27071	0.22837	27.4585	5.5e-166	7.77e-165	UP	SULT1E1	6783
9089.51	3.97329	0.144733	27.4526	6.47e-166	9.13e-165	UP	LGALS4	3960
2809.37	1.71177	0.0623596	27.45	6.94e-166	9.8e-165	NONE	TRAK1	22906
2629.81	1.93941	0.0707167	27.4251	1.38e-165	1.94e-164	NONE	EHBP1L1	254102
488.886	3.58681	0.130806	27.4208	1.55e-165	2.18e-164	UP	NPR3	4883
14.1642	-2.77485	0.101212	-27.4162	1.76e-165	2.48e-164	DOWN	RGPD3	653489
352.317	3.11945	0.113786	27.4151	1.81e-165	2.55e-164	UP	TMEM200A	114801
766.494	-2.9108	0.106184	-27.4129	1.93e-165	2.71e-164	DOWN	SEMA6D	80031
243.655	-2.37028	0.0864793	-27.4087	2.16e-165	3.04e-164	DOWN	FAM229A	100128071
1457.09	1.29488	0.047251	27.4043	2.44e-165	3.42e-164	NONE	MICU1	10367
1383.8	-1.4844	0.0541868	-27.3941	3.22e-165	4.52e-164	NONE	PRPF39	55015
157.692	-4.6639	0.170297	-27.387	3.92e-165	5.5e-164	DOWN	LCN10	414332
100.454	3.65662	0.133522	27.3859	4.04e-165	5.65e-164	UP	OXTR	5021
425.958	2.35988	0.0861723	27.3857	4.07e-165	5.69e-164	UP	FZD7	8324
7056.17	1.43357	0.0523533	27.3826	4.42e-165	6.18e-164	NONE	WDR1	9948
1957.32	-2.77424	0.101327	-27.3791	4.86e-165	6.79e-164	DOWN	TUBG2	27175
70.375	4.20299	0.153515	27.3783	4.98e-165	6.95e-164	UP	DEPDC1	55635
203.474	2.69954	0.0986127	27.3752	5.41e-165	7.55e-164	UP	AURKA	6790
171.422	2.83163	0.103487	27.3622	7.73e-165	1.08e-163	UP	BST1	683
14052.1	-1.5901	0.0581153	-27.3612	7.96e-165	1.11e-163	NONE	HNRNPH1	3187
167.443	3.14191	0.114846	27.3577	8.75e-165	1.22e-163	UP	CDH13	1012
297.961	1.91102	0.0698572	27.3561	9.13e-165	1.27e-163	NONE	FKBP7	51661
4352.87	2.98044	0.10898	27.3485	1.13e-164	1.56e-163	UP	LAPTM5	7805
226.395	2.78505	0.101891	27.3336	1.69e-164	2.35e-163	UP	GLI2	2736
473.355	-7.03096	0.257231	-27.3332	1.71e-164	2.37e-163	DOWN	ATP4A	495
107.348	8.9763	0.328452	27.3291	1.92e-164	2.66e-163	UP	EPYC	1833
2294.3	4.12474	0.150935	27.3279	1.98e-164	2.74e-163	UP	TNC	3371
340.067	2.72383	0.0996723	27.3278	1.98e-164	2.74e-163	UP	UBASH3B	84959
1414.82	-1.4111	0.051639	-27.3262	2.07e-164	2.87e-163	NONE	METTL3	56339
128.854	5.08981	0.186306	27.3196	2.48e-164	3.42e-163	UP	GJB5	2709
52.7862	3.27332	0.119864	27.3087	3.35e-164	4.62e-163	UP	PPP1R3G	648791
51.7989	6.05966	0.221982	27.298	4.48e-164	6.18e-163	UP	NKAIN4	128414
337.616	1.87431	0.0686809	27.2902	5.55e-164	7.65e-163	NONE	PRRG1	5638
12778.2	2.4552	0.0899696	27.2892	5.7e-164	7.86e-163	UP	COL4A1	1282
146.458	-2.39199	0.0876657	-27.2853	6.34e-164	8.72e-163	DOWN	LSMEM1	286006
608.242	4.78474	0.175434	27.2738	8.68e-164	1.19e-162	UP	PTGS2	5743
726.195	-1.8063	0.0662528	-27.2638	1.14e-163	1.57e-162	NONE	GRAMD1C	54762
67.7404	6.58735	0.241641	27.2609	1.23e-163	1.69e-162	UP	CCL17	6361
658.715	2.48552	0.0912779	27.2302	2.85e-163	3.91e-162	UP	PLXNC1	10154
290.525	4.79827	0.176213	27.23	2.87e-163	3.93e-162	UP	IYD	389434
219.22	4.36318	0.160239	27.2291	2.94e-163	4.02e-162	UP	NR1I2	8856
187.691	2.66233	0.0977816	27.2273	3.09e-163	4.23e-162	UP	CERKL	375298
1146.03	3.47791	0.127752	27.224	3.38e-163	4.62e-162	UP	SPOCK2	9806
219.487	5.28859	0.194267	27.2234	3.44e-163	4.7e-162	UP	KLHDC7B	113730
37.0936	5.34173	0.196257	27.218	3.98e-163	5.43e-162	UP	GDPD2	54857
164.97	3.61761	0.132945	27.2113	4.78e-163	6.52e-162	UP	CRISPLD1	83690
145.705	4.18903	0.153975	27.206	5.52e-163	7.53e-162	UP	C16orf54	283897
101.784	1.48254	0.0545114	27.1969	7.07e-163	9.64e-162	NONE	SPDYE3	441272
748.96	-2.27475	0.0836533	-27.1926	7.93e-163	1.08e-161	DOWN	FBXL8	55336
313	-4.5767	0.168355	-27.1849	9.8e-163	1.33e-161	DOWN	PEX5L	51555
796.439	3.31817	0.122087	27.1787	1.16e-162	1.58e-161	UP	MOXD1	26002
930.463	-1.48078	0.0544845	-27.1779	1.18e-162	1.61e-161	NONE	KDM4C	23081
3471.54	1.97379	0.0726377	27.1731	1.35e-162	1.83e-161	NONE	CTSC	1075
1357.05	2.10457	0.0774845	27.1612	1.87e-162	2.53e-161	UP	APOL6	80830
295.383	3.7834	0.139304	27.1593	1.97e-162	2.67e-161	UP	BIRC5	332
86.3155	3.91639	0.14426	27.1482	2.66e-162	3.6e-161	UP	ST6GAL2	84620
733.169	3.01101	0.110936	27.1418	3.17e-162	4.28e-161	UP	SLC1A1	6505
121.581	-3.75443	0.13837	-27.1333	3.99e-162	5.39e-161	DOWN	GJC3	349149
2350.48	-1.67696	0.0618079	-27.1319	4.14e-162	5.6e-161	NONE	ATG2B	55102
989.634	2.81802	0.103879	27.1278	4.63e-162	6.24e-161	UP	FERMT3	83706
1635.03	-7.13233	0.262924	-27.127	4.73e-162	6.38e-161	DOWN	AQP12A	375318
546.999	1.7695	0.0652304	27.1269	4.74e-162	6.39e-161	NONE	SOWAHC	65124
4693.95	-3.80174	0.140163	-27.1237	5.18e-162	6.98e-161	DOWN	AOX1	316
166.76	4.18004	0.15412	27.1219	5.43e-162	7.31e-161	UP	TREM1	54210
3928.62	3.03948	0.112068	27.1218	5.44e-162	7.32e-161	UP	GPNMB	10457
113.235	3.55589	0.131168	27.1095	7.61e-162	1.02e-160	UP	CD300LF	146722
270.774	6.54796	0.241687	27.0927	1.2e-161	1.61e-160	UP	CXCL13	10563
343.53	7.52774	0.277856	27.0923	1.21e-161	1.63e-160	UP	BPIFB1	92747
1603.93	1.44987	0.0535237	27.0883	1.35e-161	1.81e-160	NONE	SMS	6611
23.6727	2.11416	0.0780769	27.0779	1.79e-161	2.4e-160	UP	MAP1LC3B2	643246
2403.54	1.55042	0.0572625	27.0756	1.91e-161	2.55e-160	NONE	BMPR2	659
970.227	2.43349	0.0899026	27.0681	2.34e-161	3.13e-160	UP	DDX60	55601
1770.64	-2.35927	0.0871745	-27.0638	2.63e-161	3.51e-160	DOWN	DDT	1652
8538.9	2.49364	0.092155	27.0591	2.98e-161	3.98e-160	UP	FSTL1	11167
180.078	4.052	0.149752	27.0582	3.06e-161	4.09e-160	UP	SULT2B1	6820
610.582	-1.76201	0.0651219	-27.057	3.16e-161	4.21e-160	NONE	TSTD2	158427
2686.54	2.17559	0.0804268	27.0506	3.76e-161	5.01e-160	UP	SHROOM3	57619
696.939	3.12719	0.115618	27.0475	4.08e-161	5.44e-160	UP	HLA-DOA	3111
2114.56	-1.44257	0.0533382	-27.0458	4.28e-161	5.7e-160	NONE	SPCS2	9789
54.3621	7.57847	0.280267	27.0402	4.98e-161	6.63e-160	UP	PLA2G2D	26279
3090.52	-1.73022	0.0639899	-27.039	5.14e-161	6.83e-160	NONE	AKAP17A	8227
394.099	1.46673	0.0542465	27.0383	5.24e-161	6.96e-160	NONE	ZNF267	10308
6683.74	2.35859	0.0872439	27.0344	5.82e-161	7.73e-160	UP	MYH14	79784
83.6419	3.53974	0.130946	27.032	6.22e-161	8.24e-160	UP	PBK	55872
1089.34	1.8872	0.0698263	27.027	7.11e-161	9.42e-160	NONE	SPRY4	81848
56.4638	3.07669	0.11387	27.0194	8.75e-161	1.16e-159	UP	ESCO2	157570
482.998	7.37489	0.272992	27.015	9.85e-161	1.3e-159	UP	CR2	1380
860.853	-2.20977	0.0818139	-27.0097	1.14e-160	1.5e-159	DOWN	HDAC10	83933
311.705	3.22329	0.119395	26.9968	1.61e-160	2.13e-159	UP	SGCD	6444
246.946	2.29791	0.0851316	26.9925	1.81e-160	2.39e-159	UP	LAYN	143903
61.235	5.32028	0.197133	26.9883	2.03e-160	2.67e-159	UP	HES2	54626
550.018	2.3115	0.0856522	26.9871	2.1e-160	2.76e-159	UP	PYCARD	29108
59.306	4.6423	0.172065	26.9799	2.54e-160	3.35e-159	UP	C5orf46	389336
496.226	2.24109	0.0830698	26.9784	2.65e-160	3.49e-159	UP	PIM2	11040
7823.16	2.08769	0.0773845	26.9781	2.67e-160	3.51e-159	UP	MSN	4478
32.7009	4.9927	0.185079	26.976	2.83e-160	3.72e-159	UP	TRIM10	10107
153.003	3.61182	0.133917	26.9705	3.28e-160	4.3e-159	UP	RHOH	399
577.954	-1.67365	0.0620628	-26.9671	3.6e-160	4.72e-159	NONE	ZGPAT	84619
13766	-1.97461	0.0732314	-26.9639	3.92e-160	5.14e-159	NONE	SNRNP70	6625
4100.56	1.69714	0.0629411	26.9639	3.92e-160	5.14e-159	NONE	SPATS2L	26010
2347.57	3.83025	0.142064	26.9614	4.19e-160	5.49e-159	UP	WFDC2	10406
992.611	-3.19321	0.118461	-26.9559	4.86e-160	6.37e-159	DOWN	SARDH	1757
18.0624	6.49459	0.240977	26.951	5.55e-160	7.25e-159	UP	CSF2	1437
909.238	-2.02889	0.0752915	-26.9471	6.16e-160	8.06e-159	DOWN	TBC1D30	23329
64.1652	3.21112	0.119173	26.945	6.52e-160	8.52e-159	UP	FAM131B	9715
258.634	2.55078	0.0947258	26.9281	1.03e-159	1.35e-158	UP	CLEC2B	9976
90.4649	1.59627	0.0592941	26.9212	1.24e-159	1.62e-158	NONE	CENPL	91687
37.3594	-1.73541	0.0644637	-26.9208	1.25e-159	1.63e-158	NONE	C7orf25	79020
142.675	7.47002	0.277501	26.9189	1.32e-159	1.72e-158	UP	KLK8	11202
150.083	3.5915	0.133424	26.918	1.35e-159	1.76e-158	UP	PRRX2	51450
2012.39	2.38159	0.0884946	26.9122	1.58e-159	2.06e-158	UP	HLA-F	3134
172.831	2.08348	0.0774311	26.9076	1.79e-159	2.33e-158	UP	RARB	5915
442.844	3.03295	0.112766	26.896	2.45e-159	3.18e-158	UP	C2	717
515.068	-1.91274	0.0711584	-26.88	3.76e-159	4.88e-158	NONE	ZNF662	389114
56.512	3.83778	0.142824	26.8707	4.83e-159	6.27e-158	UP	DRP2	1821
39.3121	7.17115	0.266888	26.8695	4.99e-159	6.46e-158	UP	HAPLN1	1404
122.507	2.74038	0.101996	26.8676	5.25e-159	6.8e-158	UP	LY96	23643
899.302	1.30755	0.0486672	26.8671	5.33e-159	6.89e-158	NONE	GNPDA1	10007
13.0453	-7.78344	0.289747	-26.8628	5.97e-159	7.72e-158	DOWN	PRM2	5620
424.1	-2.26276	0.0842496	-26.8578	6.83e-159	8.83e-158	DOWN	SLC25A15	10166
315.529	2.95433	0.110021	26.8525	7.89e-159	1.02e-157	UP	TENM4	26011
429.309	-2.02443	0.0753993	-26.8495	8.55e-159	1.1e-157	DOWN	FBXO10	26267
111.47	2.86596	0.106788	26.8378	1.17e-158	1.51e-157	UP	RPL39L	116832
525.364	2.1847	0.0814321	26.8285	1.5e-158	1.94e-157	UP	ZNF385A	25946
56.8214	2.523	0.0940512	26.8258	1.61e-158	2.08e-157	UP	SLC22A4	6583
23.4002	5.12489	0.191063	26.823	1.74e-158	2.24e-157	UP	SCT	6343
1124.19	1.50166	0.0559882	26.8209	1.84e-158	2.37e-157	NONE	GSS	2937
396.224	-1.4602	0.0544474	-26.8185	1.97e-158	2.53e-157	NONE	ZNF839	55778
329.062	3.07019	0.114486	26.8171	2.04e-158	2.62e-157	UP	ZBTB7C	201501
36.4375	3.38313	0.126176	26.8128	2.29e-158	2.94e-157	UP	CYSLTR2	57105
1528.26	-1.79232	0.0668585	-26.8076	2.63e-158	3.37e-157	NONE	LARP1B	55132
12086.3	2.00964	0.0749692	26.8062	2.74e-158	3.51e-157	UP	LMNA	4000
95.0094	2.84141	0.106008	26.8038	2.92e-158	3.74e-157	UP	CHSY3	337876
228.857	-2.60649	0.0972518	-26.8014	3.11e-158	3.98e-157	DOWN	DGCR6	8214
1138.98	1.64058	0.061214	26.8007	3.17e-158	4.05e-157	NONE	STK10	6793
4574.89	2.01227	0.0750929	26.797	3.5e-158	4.47e-157	UP	MYADM	91663
1109.52	-1.75787	0.0656625	-26.7713	6.98e-158	8.92e-157	NONE	ZNF862	643641
146.409	3.43087	0.128173	26.7674	7.74e-158	9.88e-157	UP	FGF1	2246
97.6515	3.20186	0.119633	26.7639	8.5e-158	1.08e-156	UP	DIAPH3	81624
265.266	2.63548	0.0984804	26.7614	9.09e-158	1.16e-156	UP	CD300A	11314
117.588	2.05235	0.0766954	26.7598	9.51e-158	1.21e-156	UP	PLB1	151056
3142.91	-1.29178	0.0482825	-26.7547	1.09e-157	1.39e-156	NONE	FNBP4	23360
642.05	1.95964	0.0732461	26.7542	1.1e-157	1.4e-156	NONE	RIN3	79890
965.21	-1.43135	0.0535029	-26.7527	1.15e-157	1.46e-156	NONE	HAUS4	54930
356.636	-1.38415	0.051757	-26.7432	1.48e-157	1.88e-156	NONE	ZNF354B	117608
19210.4	3.04099	0.113721	26.7407	1.59e-157	2.01e-156	UP	IGFBP5	3488
174.317	1.4759	0.0551931	26.7406	1.59e-157	2.01e-156	NONE	DCLRE1B	64858
1558.98	1.90685	0.0713159	26.7381	1.7e-157	2.15e-156	NONE	UBE2L6	9246
31.0971	-3.27024	0.122313	-26.7366	1.77e-157	2.24e-156	DOWN	DCT	1638
69539.3	-1.95734	0.0732617	-26.7172	2.97e-157	3.76e-156	NONE	P4HB	5034
145.361	4.68509	0.175382	26.7136	3.27e-157	4.13e-156	UP	COX6B2	125965
530.47	2.3081	0.0864248	26.7065	3.95e-157	5e-156	UP	IL1RAP	3556
13876.5	-2.35651	0.0882486	-26.7031	4.34e-157	5.48e-156	DOWN	SLC39A14	23516
31.0973	2.85921	0.107083	26.701	4.58e-157	5.79e-156	UP	GPR85	54329
2937.04	1.45857	0.0546646	26.6822	7.57e-157	9.54e-156	NONE	ADAM10	102
70.0185	2.90381	0.108899	26.6652	1.19e-156	1.5e-155	UP	RAB42	115273
2496.02	-1.56167	0.0585854	-26.6563	1.51e-156	1.91e-155	NONE	MAZ	4150
274.223	-2.1018	0.0788488	-26.6561	1.52e-156	1.91e-155	DOWN	UBAP1L	390595
3701.97	-2.03886	0.076516	-26.6462	1.98e-156	2.49e-155	DOWN	CYB5A	1528
45.4854	3.72661	0.13992	26.6338	2.75e-156	3.46e-155	UP	TNFRSF18	8784
129.059	-1.66127	0.0623888	-26.6277	3.25e-156	4.08e-155	NONE	TIGD7	91151
86.032	5.20827	0.195716	26.6114	5.01e-156	6.28e-155	UP	DQX1	165545
1496.54	3.74442	0.14076	26.6015	6.53e-156	8.18e-155	UP	EGLN3	112399
719.285	2.11434	0.079498	26.5961	7.53e-156	9.44e-155	UP	SERTAD1	29950
549.934	2.01433	0.0757379	26.596	7.54e-156	9.44e-155	UP	FMN1	342184
426.792	-3.50966	0.131988	-26.5906	8.71e-156	1.09e-154	DOWN	NRG4	145957
4451.45	1.45019	0.0545399	26.5895	8.99e-156	1.12e-154	NONE	ACTR3	10096
1965.18	-1.57647	0.0592935	-26.5875	9.47e-156	1.18e-154	NONE	TTC14	151613
1405.76	2.18548	0.0822213	26.5805	1.14e-155	1.42e-154	UP	WIPF1	7456
1983.27	-2.50029	0.0940676	-26.5797	1.17e-155	1.45e-154	DOWN	PLEKHH1	57475
403.135	2.72283	0.102453	26.5763	1.28e-155	1.59e-154	UP	ENTPD2	954
5844.46	-3.2095	0.120812	-26.5661	1.67e-155	2.08e-154	DOWN	GPT2	84706
1935.5	1.88668	0.0710591	26.5509	2.51e-155	3.12e-154	NONE	SKIL	6498
2559.42	1.61666	0.0608896	26.5506	2.53e-155	3.15e-154	NONE	MAP7D1	55700
2180.95	2.1747	0.0819164	26.5478	2.72e-155	3.39e-154	UP	IFI16	3428
20339.8	-1.93557	0.0729631	-26.5281	4.59e-155	5.71e-154	NONE	ACADVL	37
267.318	2.52605	0.0952511	26.5199	5.71e-155	7.09e-154	UP	ADAMTS7	11173
49.9509	-5.74566	0.216701	-26.5142	6.65e-155	8.25e-154	DOWN	IFITM5	387733
282.186	2.70965	0.102205	26.5121	7.04e-155	8.72e-154	UP	SLC52A3	113278
78.3428	4.45366	0.167997	26.5103	7.37e-155	9.13e-154	UP	GUCY2C	2984
328.138	3.41	0.128631	26.5099	7.45e-155	9.22e-154	UP	F2RL2	2151
56.9581	4.29981	0.16222	26.5061	8.24e-155	1.02e-153	UP	WFDC3	140686
62.7243	7.9314	0.29929	26.5007	9.51e-155	1.18e-153	UP	NMUR2	56923
22.3527	5.0712	0.191414	26.4934	1.16e-154	1.43e-153	UP	DLX5	1749
2639.21	2.92625	0.110457	26.4921	1.19e-154	1.47e-153	UP	C1QA	712
4483.04	-1.78635	0.0674401	-26.488	1.33e-154	1.64e-153	NONE	NKTR	4820
322.468	1.96672	0.074276	26.4785	1.72e-154	2.12e-153	NONE	EHD3	30845
465.806	1.27775	0.0482628	26.4748	1.89e-154	2.33e-153	NONE	HCCS	3052
1750.55	3.15322	0.119167	26.4604	2.77e-154	3.41e-153	UP	SYT13	57586
1463.77	2.75479	0.104113	26.4596	2.83e-154	3.49e-153	UP	OAS3	4940
1530.14	1.90258	0.0719054	26.4595	2.84e-154	3.49e-153	NONE	DDAH2	23564
543.192	2.65881	0.100487	26.4592	2.86e-154	3.51e-153	UP	SRPX2	27286
6076.78	2.18006	0.0824369	26.4451	4.15e-154	5.1e-153	UP	PYGB	5834
1083.39	3.80252	0.143798	26.4435	4.33e-154	5.32e-153	UP	C15orf48	84419
447.652	1.58621	0.059995	26.4391	4.87e-154	5.97e-153	NONE	TNFAIP8L1	126282
1588.38	-1.96535	0.074338	-26.438	5.01e-154	6.14e-153	NONE	TTLL3	26140
246.231	2.76583	0.104635	26.433	5.72e-154	7e-153	UP	RAB7B	338382
4414.45	1.70674	0.0645754	26.4302	6.16e-154	7.53e-153	NONE	LITAF	9516
188.47	-1.98794	0.0752171	-26.4294	6.3e-154	7.7e-153	NONE	HAUS7	55559
158.414	3.15699	0.119468	26.4254	7e-154	8.56e-153	UP	LY86	9450
1059.82	-1.40471	0.0531642	-26.4221	7.63e-154	9.32e-153	NONE	GATC	283459
2218.6	-1.89338	0.0716722	-26.4172	8.7e-154	1.06e-152	NONE	ANGEL1	23357
392.524	2.60386	0.098575	26.415	9.21e-154	1.12e-152	UP	GLT8D2	83468
136.291	3.22867	0.122312	26.397	1.48e-153	1.81e-152	UP	NCAPG	64151
233.386	2.35727	0.0893153	26.3927	1.66e-153	2.02e-152	UP	SHF	90525
984.888	1.20958	0.0458386	26.3878	1.89e-153	2.3e-152	NONE	HMGN4	10473
896.262	-1.5943	0.0604396	-26.3784	2.42e-153	2.95e-152	NONE	MLYCD	23417
28.9007	4.61343	0.174914	26.3755	2.62e-153	3.19e-152	UP	DHDH	27294
607.348	-5.06533	0.19217	-26.3586	4.09e-153	4.97e-152	DOWN	TRIM50	135892
140.048	3.37435	0.12802	26.3579	4.16e-153	5.05e-152	UP	FOXS1	2307
854.641	1.35027	0.0512313	26.3563	4.34e-153	5.27e-152	NONE	VPS18	57617
38.5018	3.23673	0.122808	26.356	4.38e-153	5.32e-152	UP	DGKI	9162
719.484	1.24999	0.0474544	26.3409	6.53e-153	7.91e-152	NONE	BTBD10	84280
315.134	-1.95902	0.0743791	-26.3382	7e-153	8.48e-152	NONE	DNMT3B	1789
267.836	5.60693	0.212886	26.3377	7.1e-153	8.6e-152	UP	DSG3	1830
33.6186	5.84566	0.222099	26.32	1.13e-152	1.37e-151	UP	LUZP2	338645
2105.71	2.54415	0.0966709	26.3177	1.2e-152	1.45e-151	UP	ADAMTS2	9509
537.837	2.42597	0.0921933	26.314	1.33e-152	1.6e-151	UP	GLIPR2	152007
59.8769	3.15366	0.119862	26.3107	1.45e-152	1.75e-151	UP	C3orf80	401097
1515.16	-1.81154	0.0688632	-26.3064	1.62e-152	1.95e-151	NONE	IFT20	90410
198.372	4.08198	0.155201	26.3013	1.85e-152	2.23e-151	UP	ESM1	11082
558.303	-1.60142	0.0608951	-26.298	2.02e-152	2.44e-151	NONE	RGMB	285704
1679.25	1.71818	0.0653698	26.284	2.92e-152	3.51e-151	NONE	GM2A	2760
2458.79	-1.84041	0.0700215	-26.2835	2.96e-152	3.56e-151	NONE	ZNF33B	7582
1125.11	-1.41365	0.0537918	-26.28	3.25e-152	3.91e-151	NONE	EPB41L5	57669
817.139	1.49515	0.0569342	26.2609	5.36e-152	6.45e-151	NONE	ATOX1	475
78.0484	3.85748	0.146929	26.254	6.44e-152	7.73e-151	UP	ALPK2	115701
1062.88	1.75564	0.066875	26.2526	6.68e-152	8.01e-151	NONE	C1GALT1	56913
1672.76	2.35368	0.0896809	26.245	8.15e-152	9.77e-151	UP	PLS1	5357
175.153	3.09766	0.118032	26.2443	8.31e-152	9.96e-151	UP	CDT1	81620
11431.1	4.08054	0.155495	26.2423	8.75e-152	1.05e-150	UP	SFRP2	6423
473.625	1.6327	0.0622268	26.2379	9.83e-152	1.18e-150	NONE	CPPED1	55313
949.628	1.99986	0.0762437	26.2299	1.21e-151	1.45e-150	NONE	KPNA2	3838
71.6373	2.19838	0.0838167	26.2284	1.26e-151	1.51e-150	UP	SAMD14	201191
960.766	-1.32391	0.0504782	-26.2274	1.29e-151	1.55e-150	NONE	DTWD1	56986
2223.73	1.28527	0.0490142	26.2225	1.47e-151	1.76e-150	NONE	VAMP3	9341
81.5172	-2.43121	0.0927241	-26.2199	1.58e-151	1.88e-150	DOWN	MASP2	10747
1449.06	1.9568	0.0746343	26.2185	1.64e-151	1.95e-150	NONE	PIK3IP1	113791
954.485	1.86827	0.0712785	26.2108	2e-151	2.38e-150	NONE	SLC37A1	54020
97.5532	1.9472	0.0743171	26.2013	2.57e-151	3.06e-150	NONE	CENPH	64946
1149.43	1.85199	0.0706889	26.1991	2.72e-151	3.23e-150	NONE	CHSY1	22856
255.782	2.11798	0.080842	26.199	2.73e-151	3.25e-150	UP	APOBEC3G	60489
2220.82	2.8739	0.10972	26.1932	3.18e-151	3.78e-150	UP	LCP1	3936
113.246	3.02872	0.115637	26.1916	3.31e-151	3.93e-150	UP	CD163L1	283316
633.084	-2.55204	0.0974502	-26.1881	3.63e-151	4.3e-150	DOWN	ABCC6	368
301.706	3.04699	0.116353	26.1875	3.69e-151	4.38e-150	UP	RUNX3	864
48.4853	3.13449	0.11971	26.1839	4.05e-151	4.8e-150	UP	CLSPN	63967
274.108	7.48224	0.285795	26.1804	4.44e-151	5.26e-150	UP	FDCSP	260436
244.681	2.61636	0.0999475	26.1773	4.82e-151	5.71e-150	UP	ST8SIA4	7903
2475.68	-0.961073	0.036722	-26.1716	5.6e-151	6.62e-150	NONE	ARIH2	10425
434.669	3.39508	0.129742	26.1679	6.16e-151	7.29e-150	UP	SCIN	85477
976.197	3.60855	0.137902	26.1675	6.23e-151	7.36e-150	UP	SLC5A1	6523
137.42	2.34539	0.089642	26.1639	6.84e-151	8.08e-150	UP	CARD16	114769
574.785	2.83983	0.108586	26.1529	9.15e-151	1.08e-149	UP	GCNT1	2650
487.256	2.95783	0.113123	26.147	1.07e-150	1.26e-149	UP	HAPLN3	145864
264.337	7.79076	0.297969	26.1462	1.09e-150	1.28e-149	UP	FGF19	9965
743.151	-1.25696	0.0481053	-26.1293	1.69e-150	1.99e-149	NONE	ANAPC1	64682
48.2893	4.24488	0.162485	26.1247	1.91e-150	2.25e-149	UP	CRYM	1428
61.3969	2.81664	0.107861	26.1137	2.55e-150	3e-149	UP	LYPD5	284348
19.9517	5.06441	0.19395	26.1119	2.67e-150	3.14e-149	UP	NDP	4693
27.6348	6.88038	0.26364	26.0976	3.88e-150	4.56e-149	UP	DMBX1	127343
55.1494	4.66461	0.178762	26.094	4.26e-150	5e-149	UP	CD207	50489
360.613	2.21742	0.0849905	26.0902	4.71e-150	5.52e-149	UP	TNFRSF10A	8797
202.053	-2.02653	0.0776871	-26.0859	5.28e-150	6.18e-149	DOWN	MYH3	4621
163.505	2.42609	0.0930063	26.0853	5.36e-150	6.27e-149	UP	CENPU	79682
327.604	5.30801	0.203538	26.0787	6.37e-150	7.45e-149	UP	CHIT1	1118
246.288	3.92658	0.15062	26.0695	8.08e-150	9.46e-149	UP	SYT12	91683
32.0431	3.57021	0.13696	26.0676	8.5e-150	9.94e-149	UP	PPEF1	5475
16170.2	1.70504	0.0654189	26.0634	9.49e-150	1.11e-148	NONE	YWHAZ	7534
227.366	5.10017	0.195714	26.0593	1.06e-149	1.23e-148	UP	CYP2C18	1562
317.103	4.66075	0.178876	26.0557	1.16e-149	1.35e-148	UP	CDKN2A	1029
330.236	2.16374	0.0830451	26.055	1.18e-149	1.38e-148	UP	ZWINT	11130
242.015	2.79914	0.107455	26.0494	1.37e-149	1.59e-148	UP	SH3D21	79729
354.771	1.29084	0.0495944	26.0279	2.39e-149	2.79e-148	NONE	CHIC2	26511
148.718	3.68544	0.141606	26.026	2.52e-149	2.93e-148	UP	ST6GALNAC5	81849
160.103	3.12321	0.120036	26.0189	3.03e-149	3.52e-148	UP	SIM2	6493
308.578	1.77912	0.06838	26.0181	3.09e-149	3.59e-148	NONE	RTN2	6253
390.018	2.41004	0.0926362	26.0162	3.25e-149	3.77e-148	UP	MN1	4330
604.826	-1.88946	0.0726281	-26.0156	3.3e-149	3.83e-148	NONE	U2AF1L4	199746
1257.36	-1.28788	0.049534	-25.9999	4.97e-149	5.76e-148	NONE	ZNF326	284695
2354.28	-1.63285	0.062811	-25.9962	5.47e-149	6.34e-148	NONE	TAF1C	9013
223.549	3.28568	0.126398	25.9948	5.67e-149	6.57e-148	UP	CD2	914
51.8305	4.66353	0.17941	25.9938	5.83e-149	6.75e-148	UP	SIX1	6495
1550.2	1.53321	0.0589894	25.9912	6.22e-149	7.2e-148	NONE	FUCA1	2517
252.991	5.37785	0.20697	25.9837	7.56e-149	8.74e-148	UP	SLC13A5	284111
80.8808	3.30426	0.127169	25.9833	7.66e-149	8.85e-148	UP	CCNJL	79616
665.179	-1.34439	0.0517469	-25.9801	8.32e-149	9.61e-148	NONE	ALG12	79087
328.783	2.8613	0.110191	25.9667	1.18e-148	1.36e-147	UP	CDH6	1004
103.724	3.09256	0.119121	25.9614	1.35e-148	1.56e-147	UP	PIK3CG	5294
373.592	4.86815	0.187542	25.9576	1.49e-148	1.72e-147	UP	CCL20	6364
4.56282	-5.56549	0.214411	-25.9571	1.51e-148	1.74e-147	DOWN	OR6M1	390261
2066	-1.79045	0.0690084	-25.9454	2.05e-148	2.36e-147	NONE	GMPPB	29925
289.02	-3.92575	0.151319	-25.9435	2.15e-148	2.48e-147	DOWN	LPAR3	23566
499.963	2.00516	0.0773013	25.9395	2.39e-148	2.74e-147	UP	TMCC3	57458
677.857	-1.20159	0.0463439	-25.9277	3.25e-148	3.73e-147	NONE	TUBGCP4	27229
1180.11	2.05041	0.0791065	25.9196	4e-148	4.6e-147	UP	BAIAP2	10458
358.563	-1.2576	0.0485266	-25.9157	4.43e-148	5.08e-147	NONE	MTRF1L	54516
714.784	5.35861	0.206845	25.9064	5.65e-148	6.48e-147	UP	AKR1B10	57016
3550.65	2.65597	0.102528	25.9048	5.88e-148	6.74e-147	UP	COL16A1	1307
1088.61	-4.41743	0.170533	-25.9036	6.06e-148	6.95e-147	DOWN	MAT1A	4143
822.693	4.004	0.154574	25.9034	6.1e-148	6.98e-147	UP	SMIM24	284422
803.28	1.61204	0.0622404	25.9003	6.61e-148	7.56e-147	NONE	RAB8B	51762
563.372	2.64029	0.102014	25.8817	1.07e-147	1.22e-146	UP	SLC9B2	133308
3021.15	-1.44832	0.055973	-25.8753	1.26e-147	1.44e-146	NONE	CREBZF	58487
67.8606	3.52952	0.136442	25.8683	1.52e-147	1.73e-146	UP	IL21R	50615
381.277	2.29027	0.0885367	25.868	1.53e-147	1.74e-146	UP	DOCK11	139818
159.523	-1.79392	0.0693549	-25.8658	1.61e-147	1.84e-146	NONE	STARD5	80765
152.943	3.20192	0.123856	25.852	2.31e-147	2.63e-146	UP	CORIN	10699
1095.68	1.34101	0.0518805	25.848	2.56e-147	2.92e-146	NONE	HMCES	56941
134.681	2.671	0.103377	25.8376	3.36e-147	3.82e-146	UP	TRIP13	9319
4426.32	-1.47016	0.0569053	-25.8351	3.58e-147	4.07e-146	NONE	HTT	3064
6961.69	-1.48317	0.0574118	-25.8338	3.7e-147	4.21e-146	NONE	SRSF11	9295
789.825	3.30651	0.128102	25.8116	6.57e-147	7.46e-146	UP	GDA	9615
283.305	2.20848	0.0856104	25.7969	9.61e-147	1.09e-145	UP	PCED1B	91523
216.659	2.45231	0.0950686	25.7952	1e-146	1.14e-145	UP	RENBP	5973
8.16455	-5.63799	0.218617	-25.7893	1.17e-146	1.32e-145	DOWN	HSPB2-C11orf52	100528019
379.178	4.03804	0.156579	25.789	1.18e-146	1.33e-145	UP	SELL	6402
183.168	1.90409	0.0738724	25.7754	1.68e-146	1.9e-145	NONE	KIF20B	9585
19.9571	4.14129	0.160716	25.7678	2.04e-146	2.31e-145	UP	ATP6V0D2	245972
1976.84	1.74598	0.0677811	25.7591	2.55e-146	2.88e-145	NONE	ARHGEF2	9181
553.951	5.12671	0.199105	25.7487	3.33e-146	3.77e-145	UP	CXCL9	4283
2557.26	-1.63207	0.0633991	-25.7428	3.88e-146	4.38e-145	NONE	ARPIN	348110
58.6985	5.00497	0.194486	25.7344	4.82e-146	5.44e-145	UP	CCR4	1233
296.521	3.6528	0.141972	25.7289	5.55e-146	6.27e-145	UP	CD48	962
77.9855	4.31482	0.16774	25.7232	6.44e-146	7.26e-145	UP	FOXC2	2303
210.565	3.00858	0.116961	25.723	6.46e-146	7.28e-145	UP	CSF2RA	1438
1055.75	-1.39341	0.0541733	-25.7214	6.73e-146	7.59e-145	NONE	ZNF37A	7587
1001.49	-3.01353	0.117186	-25.7157	7.8e-146	8.78e-145	DOWN	C5	727
989.921	-1.0319	0.0401352	-25.7105	8.91e-146	1e-144	NONE	LIG3	3980
36.8928	5.83539	0.226996	25.707	9.76e-146	1.1e-144	UP	SOX11	6664
23.7588	3.30119	0.128422	25.7058	1.01e-145	1.13e-144	UP	HOXA1	3198
1246.9	-1.41099	0.0549023	-25.7001	1.17e-145	1.31e-144	NONE	AIDA	64853
849.676	-5.53902	0.215534	-25.6991	1.2e-145	1.34e-144	DOWN	SPX	80763
137.927	2.35909	0.0918003	25.6981	1.23e-145	1.38e-144	UP	FOXF2	2295
431.002	3.68305	0.143339	25.6946	1.34e-145	1.51e-144	UP	RRM2	6241
903.3	-1.70897	0.0665475	-25.6804	1.94e-145	2.17e-144	NONE	FRMD4A	55691
403.9	3.76433	0.146654	25.6681	2.66e-145	2.97e-144	UP	TNFRSF11B	4982
296.002	2.94062	0.114566	25.6674	2.71e-145	3.03e-144	UP	TMEM158	25907
2759.22	1.61715	0.0630091	25.6653	2.85e-145	3.19e-144	NONE	CMTM6	54918
2240.67	-1.58023	0.0615788	-25.6619	3.11e-145	3.48e-144	NONE	FBXO9	26268
882.734	1.42509	0.0555397	25.6589	3.37e-145	3.76e-144	NONE	LIX1L	128077
946.994	1.16745	0.0455134	25.6506	4.16e-145	4.64e-144	NONE	PHF20	51230
109.688	3.54059	0.138056	25.6461	4.67e-145	5.21e-144	UP	SP140	11262
1765.09	-1.4596	0.0569153	-25.6451	4.79e-145	5.34e-144	NONE	RSAD1	55316
5.6856	-4.6156	0.179986	-25.6443	4.9e-145	5.45e-144	DOWN	NRN1L	123904
14243.1	1.6036	0.0625618	25.6322	6.67e-145	7.43e-144	NONE	APLP2	334
5421.26	-3.91856	0.152916	-25.6256	7.91e-145	8.8e-144	DOWN	HPN	3249
411.739	1.08819	0.0424922	25.6091	1.21e-144	1.34e-143	NONE	ADAT1	23536
3495.88	-1.64421	0.0642343	-25.597	1.65e-144	1.83e-143	NONE	MAN2C1	4123
172.437	3.36606	0.131505	25.5965	1.67e-144	1.85e-143	UP	FOXA1	3169
23.9258	3.90694	0.152668	25.591	1.92e-144	2.13e-143	UP	ARL9	132946
224.2	7.51308	0.293609	25.5887	2.04e-144	2.26e-143	UP	TM4SF20	79853
1202.25	-1.40968	0.0550956	-25.5861	2.18e-144	2.42e-143	NONE	DALRD3	55152
861.337	1.35663	0.0530287	25.5829	2.36e-144	2.62e-143	NONE	KCTD5	54442
1122.96	1.11985	0.0437797	25.5791	2.61e-144	2.88e-143	NONE	PTPN9	5780
264.728	-4.48076	0.175324	-25.5571	4.58e-144	5.07e-143	DOWN	HPCAL4	51440
100.616	3.58299	0.1402	25.5564	4.66e-144	5.16e-143	UP	TMEM171	134285
200.257	3.66394	0.143473	25.5374	7.58e-144	8.37e-143	UP	SPTSSB	165679
78.2026	2.48756	0.0974346	25.5305	9.03e-144	9.97e-143	UP	ORC6	23594
4906.1	-1.49027	0.0583729	-25.5302	9.12e-144	1.01e-142	NONE	RBM5	10181
162.492	3.60687	0.14128	25.5299	9.18e-144	1.01e-142	UP	POU2F3	25833
80.0921	3.66867	0.143725	25.5256	1.03e-143	1.13e-142	UP	TDO2	6999
557.086	-1.81213	0.0710077	-25.5201	1.18e-143	1.3e-142	NONE	SGK3	23678
248.659	2.31677	0.0908055	25.5135	1.39e-143	1.54e-142	UP	CIT	11113
100.735	3.62263	0.142056	25.5014	1.9e-143	2.09e-142	UP	SDK2	54549
28.6121	5.47798	0.214861	25.4954	2.21e-143	2.43e-142	UP	CD70	970
212.418	4.56597	0.179104	25.4935	2.33e-143	2.56e-142	UP	SLC9A3	6550
1429.43	-1.60002	0.0627946	-25.4803	3.26e-143	3.58e-142	NONE	HEMK1	51409
1046.38	2.04896	0.0804363	25.4731	3.92e-143	4.3e-142	UP	CYP27A1	1593
269027	-1.8238	0.0715973	-25.473	3.93e-143	4.31e-142	NONE	EEF1A1	1915
871.247	1.24354	0.0488242	25.4698	4.26e-143	4.67e-142	NONE	FEZ2	9637
538.19	2.19629	0.0862504	25.4641	4.93e-143	5.4e-142	UP	SERPINB9	5272
390.204	2.36148	0.0927551	25.4593	5.57e-143	6.1e-142	UP	TSPAN18	90139
169.451	3.75168	0.147383	25.4553	6.17e-143	6.75e-142	UP	HAS2	3037
107.775	-1.34914	0.0530012	-25.4549	6.23e-143	6.81e-142	NONE	NUDT6	11162
313.304	5.93005	0.232986	25.4524	6.64e-143	7.25e-142	UP	CAPN9	10753
1727.09	-4.79989	0.188594	-25.4509	6.9e-143	7.54e-142	DOWN	EGF	1950
4534.93	5.59361	0.21987	25.4405	9e-143	9.82e-142	UP	DUOX2	50506
224.548	2.37765	0.0934677	25.4382	9.53e-143	1.04e-141	UP	CCNA2	890
56.9193	2.45582	0.0965791	25.4281	1.23e-142	1.34e-141	UP	VASH2	79805
176.595	5.88417	0.23141	25.4275	1.25e-142	1.37e-141	UP	PRAP1	118471
5717.92	-2.6629	0.104794	-25.4108	1.92e-142	2.09e-141	DOWN	IMPA2	3613
2549.14	-1.97569	0.0777651	-25.4059	2.17e-142	2.37e-141	NONE	QTRT1	81890
70.5281	6.63101	0.261035	25.4027	2.35e-142	2.56e-141	UP	LRRC31	79782
1875.12	1.43585	0.0565319	25.399	2.59e-142	2.81e-141	NONE	RNF145	153830
2689.53	2.1834	0.0859867	25.3923	3.06e-142	3.33e-141	UP	FKBP10	60681
2240	1.52569	0.060111	25.3812	4.06e-142	4.41e-141	NONE	DYNLRB1	83658
211.581	2.87055	0.11311	25.3783	4.38e-142	4.75e-141	UP	CD6	923
230.786	2.82013	0.111172	25.3673	5.79e-142	6.28e-141	UP	ITGA4	3676
1338.62	-1.53579	0.0605526	-25.3629	6.48e-142	7.02e-141	NONE	MYSM1	114803
126.123	3.09043	0.121857	25.3612	6.76e-142	7.32e-141	UP	CST7	8530
3581.41	-2.95043	0.11639	-25.3495	9.09e-142	9.84e-141	DOWN	SYBU	55638
1255.77	-3.22672	0.127302	-25.347	9.69e-142	1.05e-140	DOWN	FUT1	2523
30.0676	7.17718	0.283343	25.3303	1.48e-141	1.6e-140	UP	TINAG	27283
6971.78	7.20423	0.284458	25.3261	1.65e-141	1.78e-140	UP	TFF1	7031
122.345	2.4513	0.0967976	25.324	1.74e-141	1.88e-140	UP	WDR62	284403
510.829	-1.23874	0.0489265	-25.3184	2e-141	2.16e-140	NONE	NEU3	10825
2859.53	5.1919	0.20511	25.3127	2.31e-141	2.49e-140	UP	TCN1	6947
558.989	2.53362	0.100101	25.3107	2.44e-141	2.63e-140	UP	TTC9	23508
965.343	1.50338	0.059408	25.3061	2.74e-141	2.95e-140	NONE	DPY19L1	23333
3380.38	1.90527	0.0753009	25.3021	3.03e-141	3.26e-140	NONE	GIPC1	10755
10522.8	1.42889	0.0564741	25.3017	3.06e-141	3.29e-140	NONE	CALM2	805
600.366	2.57959	0.101988	25.293	3.82e-141	4.1e-140	UP	TK1	7083
479.063	1.49968	0.0593026	25.2886	4.26e-141	4.58e-140	NONE	ARL15	54622
462.167	2.2195	0.0877877	25.2826	4.97e-141	5.33e-140	UP	VSTM4	196740
361.136	2.19352	0.0868422	25.2587	9.09e-141	9.76e-140	UP	IFIT2	3433
1031.72	2.7322	0.108177	25.2568	9.54e-141	1.02e-139	UP	TYROBP	7305
618.343	-1.09116	0.0432053	-25.2552	9.93e-141	1.07e-139	NONE	ZMYM6	9204
361.525	-4.37008	0.173044	-25.2541	1.02e-140	1.1e-139	DOWN	TBC1D3L	101060376
153.128	-1.87885	0.0744276	-25.244	1.32e-140	1.41e-139	NONE	YPEL1	29799
678.28	1.25519	0.0497325	25.2388	1.5e-140	1.61e-139	NONE	PDZD11	51248
159.643	1.93437	0.0766437	25.2385	1.51e-140	1.62e-139	NONE	STIL	6491
2008.61	1.56763	0.0621298	25.2315	1.81e-140	1.93e-139	NONE	TMOD3	29766
5457.46	-2.96692	0.117601	-25.2288	1.94e-140	2.07e-139	DOWN	HOMER2	9455
88.2742	3.68568	0.146105	25.2263	2.06e-140	2.2e-139	UP	RNF183	138065
33.0185	4.68977	0.185952	25.2203	2.4e-140	2.56e-139	UP	ANKFN1	162282
469.711	2.22505	0.0882335	25.2178	2.56e-140	2.73e-139	UP	EMILIN2	84034
30.1907	-1.82157	0.0722376	-25.2163	2.65e-140	2.83e-139	NONE	FAM186B	84070
18.1977	3.31549	0.131491	25.2147	2.77e-140	2.95e-139	UP	DRAXIN	374946
618.412	1.10555	0.0438509	25.2116	2.99e-140	3.18e-139	NONE	ADO	84890
24876.8	-1.444	0.0573266	-25.1891	5.28e-140	5.62e-139	NONE	DDX17	10521
62.8239	3.8164	0.151557	25.1812	6.44e-140	6.85e-139	UP	MUC12	10071
1077.51	2.9285	0.116307	25.1791	6.78e-140	7.21e-139	UP	PRRX1	5396
439.365	1.75993	0.0699252	25.1687	8.83e-140	9.38e-139	NONE	TMEM44	93109
227.277	8.62563	0.342734	25.1671	9.18e-140	9.74e-139	UP	B3GNT6	192134
4930.85	-1.52078	0.0604421	-25.161	1.07e-139	1.14e-138	NONE	SYVN1	84447
6158.18	-2.14841	0.0853881	-25.1605	1.09e-139	1.15e-138	DOWN	LRIG1	26018
120.493	3.72072	0.147959	25.1469	1.53e-139	1.62e-138	UP	KIF18B	146909
382.289	2.00432	0.0797213	25.1416	1.74e-139	1.85e-138	UP	KLHL25	64410
544.208	1.81182	0.072074	25.1384	1.89e-139	2.01e-138	NONE	MSRB2	22921
75.1667	3.0921	0.123015	25.136	2.01e-139	2.13e-138	UP	HOXC6	3223
31.5214	2.60575	0.103679	25.1328	2.18e-139	2.3e-138	UP	CMTM1	113540
414.071	1.15926	0.0461391	25.1253	2.63e-139	2.78e-138	NONE	FAM118B	79607
236.007	2.23266	0.0888799	25.12	3.01e-139	3.18e-138	UP	XRCC4	7518
690.123	1.61665	0.0643649	25.1169	3.25e-139	3.43e-138	NONE	MAD1L1	8379
89.546	3.84896	0.153285	25.1098	3.89e-139	4.1e-138	UP	ITIH2	3698
76.7004	3.51954	0.140206	25.1026	4.65e-139	4.91e-138	UP	KLRB1	3820
2323.91	-1.42663	0.0568697	-25.0859	7.1e-139	7.48e-138	NONE	SEC22B	9554
31.9834	3.41643	0.136215	25.0812	7.98e-139	8.4e-138	UP	CA14	23632
576.366	2.10917	0.0841253	25.0718	1.01e-138	1.06e-137	UP	CDC42EP2	10435
1058.92	2.2428	0.0894677	25.0683	1.1e-138	1.16e-137	UP	FRMD6	122786
342.52	2.81218	0.112228	25.0577	1.44e-138	1.51e-137	UP	HR	55806
4639.31	-1.68056	0.0670755	-25.0548	1.55e-138	1.63e-137	NONE	PNISR	25957
642.311	2.66156	0.106251	25.0497	1.76e-138	1.85e-137	UP	GRAMD1B	57476
2.75931	-5.70381	0.227751	-25.0441	2.03e-138	2.13e-137	DOWN	GDF1	2657
5.45101	-4.65142	0.185757	-25.0404	2.22e-138	2.33e-137	DOWN	SPDYE2B	100310812
3933.42	2.17873	0.087017	25.038	2.36e-138	2.47e-137	UP	HTRA1	5654
1134.58	-2.80223	0.111932	-25.035	2.54e-138	2.66e-137	DOWN	CBFA2T3	863
564.59	4.09142	0.16344	25.0331	2.66e-138	2.79e-137	UP	AREG	374
1689.55	1.42959	0.0571091	25.0326	2.7e-138	2.83e-137	NONE	CYB5B	80777
112.314	-2.19695	0.087764	-25.0324	2.71e-138	2.84e-137	DOWN	PDF	64146
65.0807	2.76086	0.110343	25.0207	3.64e-138	3.81e-137	UP	VMO1	284013
474.093	-1.24828	0.0498903	-25.0205	3.66e-138	3.82e-137	NONE	STRADB	55437
2155.93	-2.47498	0.0989284	-25.0178	3.91e-138	4.08e-137	DOWN	ZNF710	374655
365.792	2.88203	0.115212	25.0149	4.2e-138	4.39e-137	UP	FOXM1	2305
444.415	3.75293	0.150065	25.0087	4.92e-138	5.13e-137	UP	FOSL1	8061
39.5283	7.73182	0.309174	25.008	5.01e-138	5.22e-137	UP	PAEP	5047
3938.51	6.44489	0.257732	25.0062	5.23e-138	5.45e-137	UP	TFF2	7032
965.292	-1.59445	0.0637859	-24.9969	6.6e-138	6.87e-137	NONE	CTNS	1497
1834.01	1.67384	0.0669666	24.9952	6.9e-138	7.18e-137	NONE	PLIN3	10226
304.558	-2.52479	0.101025	-24.9917	7.53e-138	7.84e-137	DOWN	YJEFN3	374887
705.544	-1.86844	0.0747874	-24.9834	9.27e-138	9.63e-137	NONE	CFAP44	55779
2236.65	-1.30246	0.0521474	-24.9766	1.1e-137	1.14e-136	NONE	SECISBP2	79048
605.101	6.24843	0.250235	24.9703	1.29e-137	1.34e-136	UP	LY6D	8581
601.683	1.86647	0.0747712	24.9623	1.57e-137	1.63e-136	NONE	ACOT7	11332
2822.65	1.90131	0.0761742	24.96	1.66e-137	1.72e-136	NONE	ETS1	2113
16841.8	1.95518	0.0783396	24.9578	1.76e-137	1.82e-136	NONE	GSN	2934
1926.43	2.57901	0.103337	24.9572	1.79e-137	1.85e-136	UP	SRGN	5552
1133.41	1.55918	0.0624843	24.9531	1.97e-137	2.04e-136	NONE	SPRED1	161742
8311.45	2.41189	0.0966695	24.9498	2.14e-137	2.22e-136	UP	PMEPA1	56937
1226.01	1.63184	0.0654215	24.9434	2.52e-137	2.6e-136	NONE	TWF2	11344
4.43952	-5.65278	0.22663	-24.9427	2.56e-137	2.65e-136	DOWN	OR10G4	390264
39325.4	2.10195	0.084329	24.9256	3.93e-137	4.06e-136	UP	GAPDH	2597
3473.3	4.29039	0.172143	24.9234	4.15e-137	4.28e-136	UP	GREM1	26585
1144.17	2.35131	0.0943709	24.9156	5.04e-137	5.2e-136	UP	CD4	920
46.0123	2.43199	0.0976127	24.9147	5.16e-137	5.32e-136	UP	DDIAS	220042
151.484	3.53561	0.141925	24.9118	5.54e-137	5.71e-136	UP	LRRC66	339977
1228.92	-1.48656	0.0596853	-24.9067	6.29e-137	6.48e-136	NONE	NADK2	133686
4582.65	-1.92538	0.0773314	-24.8978	7.86e-137	8.09e-136	NONE	ULK1	8408
3545.55	-2.2463	0.0902725	-24.8835	1.12e-136	1.15e-135	DOWN	ERN1	2081
775.989	-1.40906	0.0566539	-24.8714	1.52e-136	1.56e-135	NONE	ZNF558	148156
404.426	1.74526	0.0701922	24.8641	1.82e-136	1.87e-135	NONE	TFPT	29844
1620.25	-1.8509	0.0744423	-24.8635	1.85e-136	1.9e-135	NONE	KRTCAP2	200185
1424.26	1.34758	0.0541999	24.8631	1.87e-136	1.92e-135	NONE	DYNLT1	6993
1354.25	1.69552	0.0682145	24.8557	2.25e-136	2.3e-135	NONE	HMGB2	3148
114.286	-2.32988	0.0937445	-24.8535	2.37e-136	2.43e-135	DOWN	SSC4D	136853
1899.64	-1.97292	0.0793886	-24.8514	2.5e-136	2.56e-135	NONE	ENKD1	84080
815.452	2.49972	0.100591	24.8505	2.56e-136	2.62e-135	UP	ZNF185	7739
277.7	1.95525	0.0786812	24.8503	2.57e-136	2.63e-135	NONE	SPAG5	10615
39.7363	4.8323	0.194543	24.8392	3.39e-136	3.46e-135	UP	FOXD1	2297
1782.34	1.73082	0.0696853	24.8377	3.51e-136	3.59e-135	NONE	SDC3	9672
5349.65	3.44536	0.138753	24.8309	4.16e-136	4.25e-135	UP	APOE	348
303.047	2.70088	0.108838	24.8157	6.07e-136	6.2e-135	UP	METTL7B	196410
1235.79	1.902	0.0766476	24.8148	6.2e-136	6.33e-135	NONE	MCU	90550
5225.58	-1.31254	0.0529047	-24.8095	7.08e-136	7.23e-135	NONE	ANAPC5	51433
397.982	1.57703	0.0635695	24.808	7.34e-136	7.49e-135	NONE	ARL4A	10124
16434.4	-1.75303	0.0706665	-24.8071	7.51e-136	7.66e-135	NONE	RPL26	6154
1582.04	-1.53394	0.0618546	-24.7991	9.16e-136	9.33e-135	NONE	MOB3C	148932
198.885	-1.6014	0.0645822	-24.7962	9.85e-136	1e-134	NONE	ACTR3C	653857
6304.59	-3.30289	0.133224	-24.7919	1.1e-135	1.11e-134	DOWN	IL22RA1	58985
6774.79	2.11744	0.0854096	24.7916	1.1e-135	1.12e-134	UP	GOLM1	51280
475.082	2.59159	0.104537	24.7912	1.11e-135	1.13e-134	UP	AIF1	199
12624.5	3.76911	0.152036	24.7909	1.12e-135	1.14e-134	UP	MMP7	4316
1058.66	-4.24323	0.171229	-24.7811	1.44e-135	1.46e-134	DOWN	NPHS1	4868
1301.23	2.39361	0.096646	24.7668	2.05e-135	2.08e-134	UP	RCN3	57333
1502.98	5.04649	0.203762	24.7666	2.05e-135	2.08e-134	UP	ERN2	10595
1729.93	1.43848	0.0580823	24.7662	2.08e-135	2.1e-134	NONE	ACSL3	2181
311.508	2.39932	0.0968944	24.7622	2.29e-135	2.32e-134	UP	NHS	4810
2001.6	-1.52271	0.0614948	-24.7617	2.32e-135	2.35e-134	NONE	DYM	54808
1064.26	-1.35832	0.0548573	-24.761	2.36e-135	2.39e-134	NONE	BCS1L	617
233.185	2.45818	0.09931	24.7526	2.91e-135	2.94e-134	UP	GAL3ST4	79690
2548.75	1.53439	0.0619919	24.7514	2.99e-135	3.02e-134	NONE	PML	5371
191.333	2.72872	0.110246	24.7513	3e-135	3.03e-134	UP	E2F1	1869
7088.68	-4.31167	0.174214	-24.7492	3.16e-135	3.19e-134	DOWN	SLC39A5	283375
2722.17	2.36463	0.0955439	24.7492	3.16e-135	3.19e-134	UP	SPON2	10417
49.826	-3.07715	0.12436	-24.7438	3.62e-135	3.65e-134	DOWN	HRNR	388697
33.5455	7.33441	0.296426	24.7428	3.71e-135	3.74e-134	UP	PRSS33	260429
604.577	-1.21948	0.0492995	-24.7363	4.36e-135	4.39e-134	NONE	STK19	8859
233.972	2.2606	0.091404	24.7319	4.86e-135	4.89e-134	UP	BCAS4	55653
757.817	2.40284	0.0971584	24.7311	4.95e-135	4.98e-134	UP	ISG20	3669
885.456	-1.28104	0.0518014	-24.7298	5.11e-135	5.14e-134	NONE	AZI2	64343
148.755	2.89567	0.117132	24.7215	6.29e-135	6.32e-134	UP	UHRF1	29128
1627.9	1.53648	0.0621529	24.721	6.35e-135	6.38e-134	NONE	LIMS1	3987
326.44	-1.7858	0.0722561	-24.7148	7.41e-135	7.44e-134	NONE	PRDM5	11107
2032.51	1.82341	0.0738151	24.7025	1.01e-134	1.01e-133	NONE	SLC9A1	6548
2249.85	1.72105	0.0696852	24.6976	1.14e-134	1.14e-133	NONE	DBN1	1627
31.5208	4.46529	0.180808	24.6962	1.17e-134	1.18e-133	UP	HOXC9	3225
517.325	1.814	0.0734692	24.6907	1.35e-134	1.35e-133	NONE	ABRACL	58527
508.863	1.09919	0.0445219	24.6888	1.41e-134	1.41e-133	NONE	CDYL	9425
212.234	-1.43765	0.0582573	-24.6776	1.86e-134	1.86e-133	NONE	ZNF891	101060200
11783.4	2.00101	0.0810888	24.6768	1.9e-134	1.9e-133	UP	LRP1	4035
645.893	-2.18548	0.0885773	-24.6731	2.08e-134	2.08e-133	DOWN	ZDBF2	57683
136.343	2.85076	0.11556	24.669	2.3e-134	2.3e-133	UP	SNX20	124460
2147.72	1.23627	0.0501278	24.6623	2.72e-134	2.71e-133	NONE	PSEN1	5663
401.418	3.57154	0.144878	24.652	3.5e-134	3.49e-133	UP	EGR2	1959
3881.96	2.02113	0.08199	24.6509	3.59e-134	3.59e-133	UP	CLTB	1212
380.37	2.323	0.0942651	24.6433	4.34e-134	4.33e-133	UP	GMFG	9535
39.6618	4.01506	0.162991	24.6336	5.52e-134	5.5e-133	UP	SIRPG	55423
1113.76	-4.10783	0.166858	-24.6187	7.97e-134	7.94e-133	DOWN	SLC1A2	6506
23.8382	6.89323	0.280024	24.6165	8.4e-134	8.36e-133	UP	MSLNL	401827
172.635	3.14147	0.127626	24.6146	8.81e-134	8.76e-133	UP	BEAN1	146227
13208.7	3.31672	0.134764	24.6114	9.53e-134	9.48e-133	UP	KRT7	3855
69470.1	-4.69443	0.190817	-24.6017	1.21e-133	1.2e-132	DOWN	PRSS3	5646
1358.47	-1.33549	0.0543132	-24.5887	1.67e-133	1.66e-132	NONE	NUS1	116150
221.22	-1.2754	0.0518796	-24.5839	1.88e-133	1.86e-132	NONE	HNRNPA1L2	144983
111.632	2.5697	0.10454	24.5811	2.01e-133	1.99e-132	UP	SP6	80320
52.8274	3.00188	0.122129	24.5796	2.09e-133	2.07e-132	UP	BEND6	221336
1972.09	-5.33752	0.217179	-24.5766	2.25e-133	2.22e-132	DOWN	PM20D1	148811
258.124	1.39276	0.056686	24.5698	2.66e-133	2.63e-132	NONE	CCDC51	79714
6450.65	1.91548	0.0779652	24.5683	2.75e-133	2.73e-132	NONE	PERP	64065
1808.95	1.35457	0.0551727	24.5515	4.17e-133	4.12e-132	NONE	ATP6V1F	9296
2071.4	-2.33565	0.0951494	-24.5472	4.64e-133	4.58e-132	DOWN	PABPC1L	80336
120.108	3.00533	0.122435	24.5463	4.73e-133	4.68e-132	UP	CD247	919
133.154	3.37129	0.137389	24.5384	5.76e-133	5.69e-132	UP	GJC2	57165
2917.88	-1.66898	0.0680259	-24.5345	6.33e-133	6.25e-132	NONE	ZNF395	55893
46.0704	-3.22468	0.131439	-24.5336	6.47e-133	6.39e-132	DOWN	CYP17A1	1586
495.251	1.38144	0.0563236	24.5268	7.64e-133	7.53e-132	NONE	PHF19	26147
39.5781	2.58499	0.105421	24.5207	8.89e-133	8.76e-132	UP	ERCC6L	54821
1003.89	-2.0205	0.0824223	-24.5141	1.05e-132	1.03e-131	DOWN	PRSS16	10279
327.463	3.20937	0.130941	24.5101	1.15e-132	1.13e-131	UP	CD3E	916
110.783	3.09703	0.126385	24.5046	1.32e-132	1.3e-131	UP	PLD4	122618
2417.37	-1.53005	0.0624422	-24.5035	1.36e-132	1.33e-131	NONE	SUGP2	10147
44.8706	4.04915	0.165291	24.4971	1.59e-132	1.56e-131	UP	THSD7B	80731
1616.84	1.54145	0.0629345	24.4929	1.76e-132	1.73e-131	NONE	REEP3	221035
2401.51	1.08527	0.0443149	24.4899	1.89e-132	1.86e-131	NONE	PAFAH1B2	5049
112.023	-4.22393	0.172481	-24.4893	1.92e-132	1.89e-131	DOWN	ACTA1	58
2531.5	2.32634	0.0950011	24.4875	2.01e-132	1.97e-131	UP	LPCAT4	254531
122.059	-2.97346	0.121436	-24.4858	2.09e-132	2.05e-131	DOWN	CHRNA7	1139
1426.48	-1.97826	0.0807955	-24.4848	2.14e-132	2.1e-131	NONE	GDPD5	81544
85.867	4.70891	0.192321	24.4846	2.15e-132	2.11e-131	UP	ADAMDEC1	27299
60.9776	2.65996	0.108745	24.4606	3.88e-132	3.8e-131	UP	PPM1N	147699
145.535	2.26849	0.0927656	24.454	4.57e-132	4.47e-131	UP	GAS2L3	283431
89.4426	-1.9625	0.0802856	-24.4439	5.84e-132	5.71e-131	NONE	CDNF	441549
432.383	-1.69956	0.0695493	-24.4367	6.96e-132	6.8e-131	NONE	ADAT2	134637
2921.68	2.22562	0.0911244	24.4239	9.52e-132	9.3e-131	UP	NBL1	4681
59.0623	2.50266	0.102477	24.4217	1.01e-131	9.82e-131	UP	NRIP3	56675
9.75947	5.3591	0.219561	24.4082	1.4e-131	1.36e-130	UP	KERA	11081
1219.87	-1.62308	0.0665249	-24.3981	1.79e-131	1.75e-130	NONE	DPH7	92715
557.613	-1.17441	0.048148	-24.3917	2.09e-131	2.04e-130	NONE	ZNF202	7753
1018.95	-1.21571	0.0498502	-24.3873	2.33e-131	2.27e-130	NONE	ZNF22	7570
1852.49	-1.23259	0.0505545	-24.3814	2.7e-131	2.63e-130	NONE	EDC4	23644
49.6595	-4.87971	0.200152	-24.38	2.78e-131	2.71e-130	DOWN	MYH6	4624
46.1999	3.96829	0.162847	24.3683	3.71e-131	3.61e-130	UP	SH2D1A	4068
372.428	1.5458	0.0634536	24.3611	4.42e-131	4.3e-130	NONE	ZNF462	58499
3075.86	1.39054	0.0570947	24.3549	5.14e-131	4.99e-130	NONE	IL13RA1	3597
71.1157	-3.20042	0.131437	-24.3494	5.89e-131	5.71e-130	DOWN	SYCP2L	221711
513.566	1.56393	0.0642409	24.3447	6.59e-131	6.4e-130	NONE	CARD6	84674
2345.83	2.81859	0.115785	24.3434	6.81e-131	6.61e-130	UP	ITGB2	3689
18.0364	4.32907	0.177863	24.3393	7.53e-131	7.3e-130	UP	RIPPLY3	53820
566.941	-1.09002	0.0447864	-24.3382	7.73e-131	7.49e-130	NONE	CDAN1	146059
375.554	1.93579	0.0795412	24.3369	7.98e-131	7.73e-130	NONE	KIF3C	3797
3075.16	-1.56137	0.0641667	-24.3331	8.76e-131	8.48e-130	NONE	SLC25A36	55186
17.0589	3.4134	0.140347	24.3211	1.17e-130	1.13e-129	UP	MTRNR2L12	100463498
314.442	-1.22755	0.050492	-24.3117	1.47e-130	1.42e-129	NONE	CDC26	246184
58.797	3.63964	0.149714	24.3107	1.51e-130	1.46e-129	UP	STAC	6769
845.766	4.07324	0.16755	24.3106	1.52e-130	1.46e-129	UP	VNN1	8876
300.208	1.21942	0.0501669	24.3072	1.65e-130	1.59e-129	NONE	CSTF2	1478
244.923	2.67695	0.110143	24.3043	1.77e-130	1.7e-129	UP	LST1	7940
3817.97	2.27262	0.0935155	24.3021	1.86e-130	1.8e-129	UP	LTBP2	4053
26.122	4.77653	0.196572	24.2992	2e-130	1.93e-129	UP	PNOC	5368
43.4586	-5.37844	0.221361	-24.2971	2.1e-130	2.03e-129	DOWN	C10orf71	118461
48.6966	2.90058	0.119389	24.2951	2.21e-130	2.12e-129	UP	PDCD1LG2	80380
553.34	-2.44047	0.100461	-24.2928	2.34e-130	2.25e-129	DOWN	SLC25A27	9481
1277.55	2.00188	0.0824073	24.2924	2.36e-130	2.27e-129	UP	TNFRSF1B	7133
65.5623	2.78333	0.114604	24.2865	2.72e-130	2.61e-129	UP	POLQ	10721
64.0518	3.8949	0.160387	24.2844	2.87e-130	2.75e-129	UP	CD28	940
3014.75	3.73349	0.153745	24.2837	2.92e-130	2.8e-129	UP	CXCL14	9547
3471.29	-1.26156	0.0519683	-24.2756	3.55e-130	3.41e-129	NONE	UBE2G2	7327
150.649	2.50715	0.103301	24.2703	4.03e-130	3.87e-129	UP	TNFSF4	7292
3141.71	1.40902	0.0580689	24.2647	4.63e-130	4.44e-129	NONE	PTBP3	9991
99.3032	-1.4577	0.0600783	-24.2634	4.78e-130	4.58e-129	NONE	ZNF852	285346
207.535	3.06029	0.126152	24.2588	5.34e-130	5.12e-129	UP	CPNE7	27132
25.9525	4.70225	0.193902	24.2507	6.5e-130	6.22e-129	UP	PRND	23627
45.1489	4.26851	0.176041	24.2473	7.06e-130	6.75e-129	UP	HS3ST3A1	9955
678.459	-1.94619	0.080267	-24.2465	7.2e-130	6.88e-129	NONE	FAM221A	340277
294.764	3.06732	0.126512	24.2452	7.43e-130	7.1e-129	UP	LILRB4	11006
2620.98	-1.82739	0.0753721	-24.2449	7.48e-130	7.15e-129	NONE	DNAJB9	4189
1125.06	-2.97709	0.1228	-24.2435	7.75e-130	7.4e-129	DOWN	SLC16A10	117247
113.893	-2.68746	0.110866	-24.2406	8.32e-130	7.94e-129	DOWN	KCNN2	3781
640.705	2.02394	0.0835016	24.2383	8.79e-130	8.38e-129	UP	SSPN	8082
600.994	1.85518	0.0765467	24.236	9.3e-130	8.86e-129	NONE	PRRG4	79056
2496.13	-1.19273	0.0492175	-24.2339	9.77e-130	9.31e-129	NONE	TNRC6A	27327
25166.1	2.67497	0.11041	24.2277	1.14e-129	1.08e-128	UP	COL6A3	1293
310.911	-1.5173	0.06263	-24.2264	1.17e-129	1.12e-128	NONE	ZNF595	152687
50.7194	2.35741	0.0973305	24.2207	1.35e-129	1.28e-128	UP	SPNS3	201305
95.9849	-4.48944	0.185357	-24.2205	1.35e-129	1.29e-128	DOWN	EPO	2056
1121.84	1.23249	0.0508927	24.2174	1.46e-129	1.39e-128	NONE	STK4	6789
51.6236	2.7796	0.114862	24.1994	2.26e-129	2.14e-128	UP	ARL11	115761
717.752	2.41763	0.0999649	24.1848	3.22e-129	3.05e-128	UP	GBP1	2633
129.455	2.85231	0.117985	24.1753	4.05e-129	3.84e-128	UP	ESPL1	9700
4736.6	1.78162	0.0736968	24.1751	4.07e-129	3.86e-128	NONE	GPX1	2876
5136.51	2.17455	0.0899891	24.1646	5.24e-129	4.97e-128	UP	MAL2	114569
43.5115	3.80576	0.157602	24.1479	7.86e-129	7.45e-128	UP	IRX5	10265
1692.55	1.21058	0.0501322	24.1477	7.89e-129	7.47e-128	NONE	C5orf15	56951
430.738	3.1429	0.130156	24.1472	8e-129	7.57e-128	UP	DIO2	1734
36.9905	3.79667	0.157262	24.1423	9e-129	8.51e-128	UP	NOG	9241
53.9888	3.33237	0.138053	24.1383	9.9e-129	9.36e-128	UP	FOLH1	2346
82.9314	4.12611	0.170952	24.1361	1.04e-128	9.87e-128	UP	IL11	3589
774.413	-0.812463	0.0336623	-24.1357	1.05e-128	9.96e-128	NONE	ZSCAN29	146050
9536.63	3.96302	0.164251	24.1278	1.28e-128	1.2e-127	UP	PIGR	5284
339.542	2.49404	0.103402	24.1197	1.55e-128	1.46e-127	UP	HAVCR2	84868
652.364	2.67803	0.111088	24.1073	2.09e-128	1.97e-127	UP	IRF8	3394
1444.96	-1.7099	0.070935	-24.1052	2.21e-128	2.08e-127	NONE	HOOK1	51361
8670.66	2.69716	0.111913	24.1005	2.47e-128	2.33e-127	UP	ACTA2	59
970.54	1.45971	0.0605702	24.0994	2.54e-128	2.39e-127	NONE	DYNLT3	6990
1321.55	1.54685	0.0641937	24.0966	2.72e-128	2.55e-127	NONE	SEC23A	10484
1609.22	1.98558	0.0824013	24.0965	2.72e-128	2.56e-127	NONE	ARHGAP27	201176
151.223	3.017	0.125226	24.0924	3e-128	2.82e-127	UP	CD5	921
737.627	-1.17361	0.0487252	-24.0862	3.49e-128	3.27e-127	NONE	BIVM	54841
164.023	2.9409	0.122123	24.0815	3.9e-128	3.67e-127	UP	TAGAP	117289
2244.92	1.35001	0.0560917	24.068	5.41e-128	5.08e-127	NONE	PSMD1	5707
65.3273	-1.80363	0.0749548	-24.0629	6.11e-128	5.73e-127	NONE	ASB14	142686
27.1908	4.32003	0.179567	24.058	6.88e-128	6.45e-127	UP	HOXC8	3224
357.985	7.78145	0.323461	24.0569	7.08e-128	6.63e-127	UP	KRT20	54474
2214.36	1.44726	0.0601607	24.0566	7.11e-128	6.66e-127	NONE	PGD	5226
4928.71	1.6266	0.067616	24.0565	7.14e-128	6.69e-127	NONE	ARL6IP1	23204
4165.67	2.60374	0.108252	24.0525	7.86e-128	7.35e-127	UP	NNMT	4837
727.017	3.78938	0.15756	24.0504	8.27e-128	7.73e-127	UP	MYO7B	4648
1127.04	1.80602	0.0751079	24.0457	9.25e-128	8.64e-127	NONE	RARG	5916
29.7007	5.26739	0.219061	24.0454	9.33e-128	8.72e-127	UP	CLCN1	1180
3990.87	1.95029	0.0811311	24.0387	1.09e-127	1.02e-126	NONE	LMO7	4008
473.768	-3.64287	0.151571	-24.0341	1.22e-127	1.14e-126	DOWN	CAMK2N2	94032
30.1196	6.84065	0.284666	24.0304	1.34e-127	1.25e-126	UP	MOGAT3	346606
103.203	3.85931	0.160679	24.0188	1.77e-127	1.65e-126	UP	DUOXA1	90527
152.731	2.34023	0.0974646	24.0111	2.13e-127	1.99e-126	UP	HVCN1	84329
1951.86	-1.44932	0.0603654	-24.0091	2.24e-127	2.08e-126	NONE	PHKA2	5256
59.972	4.20972	0.175352	24.0072	2.34e-127	2.18e-126	UP	SIGLEC15	284266
53.7282	-1.74388	0.0726529	-24.0029	2.6e-127	2.41e-126	NONE	CCDC7	79741
9389.66	1.56908	0.0653758	24.0009	2.72e-127	2.53e-126	NONE	MYL12B	103910
345.115	2.4607	0.102533	23.999	2.85e-127	2.65e-126	UP	APOBR	55911
2405.7	-1.66692	0.0694705	-23.9947	3.16e-127	2.93e-126	NONE	COBLL1	22837
1303.04	-1.51601	0.0631844	-23.9934	3.26e-127	3.03e-126	NONE	MCCC1	56922
283.266	2.34138	0.0976043	23.9885	3.66e-127	3.4e-126	UP	ZNF521	25925
1308.62	-2.80788	0.117062	-23.9862	3.88e-127	3.59e-126	DOWN	RPSAP58	388524
484.908	-1.09505	0.0456565	-23.9846	4.03e-127	3.73e-126	NONE	CCDC66	285331
1298.45	2.58717	0.107885	23.9808	4.42e-127	4.09e-126	UP	LSP1	4046
874.434	2.44848	0.102111	23.9787	4.64e-127	4.29e-126	UP	FUT2	2524
63.5756	3.45821	0.144234	23.9763	4.92e-127	4.55e-126	UP	CD3G	917
9029.3	-1.89489	0.0790333	-23.9759	4.96e-127	4.59e-126	NONE	CDK5RAP3	80279
2638.11	4.02345	0.16785	23.9705	5.65e-127	5.23e-126	UP	HLA-DRB5	3127
602.194	-1.27116	0.0530528	-23.9602	7.23e-127	6.67e-126	NONE	PIGH	5283
1095.47	1.13736	0.0474701	23.9596	7.34e-127	6.77e-126	NONE	LEPROTL1	23484
1303.44	-2.4024	0.100294	-23.9535	8.5e-127	7.84e-126	DOWN	ARHGEF4	50649
1557.44	2.04723	0.0854681	23.9532	8.56e-127	7.9e-126	UP	TMEM54	113452
7769.74	1.38809	0.0579511	23.9528	8.64e-127	7.97e-126	NONE	RAC1	5879
2056.14	1.18016	0.049284	23.946	1.02e-126	9.37e-126	NONE	SUMO1	7341
555.497	1.30065	0.0543189	23.9447	1.05e-126	9.65e-126	NONE	MRPL47	57129
1027.35	2.42311	0.101201	23.9436	1.08e-126	9.92e-126	UP	NME1-NME2	654364
1060.46	-1.39353	0.0582056	-23.9414	1.14e-126	1.04e-125	NONE	NEURL4	84461
43.1905	3.94499	0.164823	23.9347	1.33e-126	1.23e-125	UP	CTLA4	1493
57.3654	5.7044	0.238441	23.9238	1.73e-126	1.59e-125	UP	MOGAT2	80168
910.506	-1.48681	0.0621675	-23.9161	2.08e-126	1.91e-125	NONE	SPRYD4	283377
67.2176	7.60585	0.318024	23.9159	2.09e-126	1.92e-125	UP	CYP24A1	1591
83.2485	8.70197	0.363942	23.9103	2.39e-126	2.19e-125	UP	NPSR1	387129
102.114	-2.45265	0.102581	-23.9093	2.45e-126	2.25e-125	DOWN	PMFBP1	83449
15258.3	-2.82041	0.117976	-23.9065	2.62e-126	2.4e-125	DOWN	BTG2	7832
573.941	2.13457	0.0892897	23.9061	2.64e-126	2.42e-125	UP	CLEC11A	6320
2103.51	1.6276	0.0681169	23.8941	3.52e-126	3.23e-125	NONE	PSMB3	5691
304.573	3.06432	0.128274	23.8889	3.99e-126	3.65e-125	UP	GPR183	1880
41391.6	-3.59055	0.150308	-23.888	4.08e-126	3.74e-125	DOWN	GATM	2628
2617.99	1.91312	0.0801058	23.8824	4.67e-126	4.27e-125	NONE	PTK7	5754
75.2695	6.3118	0.264389	23.8731	5.83e-126	5.33e-125	UP	SOX21	11166
470.567	2.66066	0.111512	23.8599	7.99e-126	7.3e-125	UP	RASAL1	8437
849.319	-1.22967	0.0515376	-23.8596	8.05e-126	7.35e-125	NONE	MPPE1	65258
106.7	4.29341	0.179975	23.8556	8.87e-126	8.09e-125	UP	VGLL1	51442
1084.59	2.60185	0.109111	23.8459	1.12e-125	1.02e-124	UP	GBP3	2635
1655.43	1.25138	0.0524807	23.8447	1.15e-125	1.05e-124	NONE	ZBTB7A	51341
1055.94	3.45893	0.145062	23.8444	1.16e-125	1.05e-124	UP	FLNC	2318
1143.38	-1.39278	0.0584313	-23.8362	1.41e-125	1.28e-124	NONE	ZNF384	171017
6685.51	-1.46642	0.0615299	-23.8327	1.53e-125	1.39e-124	NONE	WDR6	11180
116.905	2.42256	0.10165	23.8323	1.55e-125	1.41e-124	UP	C3orf70	285382
215.819	3.80822	0.159924	23.8127	2.47e-125	2.25e-124	UP	SDS	10993
6.17568	-6.83261	0.287015	-23.8058	2.91e-125	2.64e-124	DOWN	DEFA1	1667
460.806	-1.43913	0.0604818	-23.7944	3.82e-125	3.47e-124	NONE	ZNF181	339318
987.456	2.24003	0.094151	23.7919	4.06e-125	3.68e-124	UP	ARHGAP23	57636
568.244	-1.96933	0.0827834	-23.7889	4.35e-125	3.95e-124	NONE	GATA2	2624
234.95	1.8973	0.079757	23.7885	4.4e-125	3.99e-124	NONE	FEZ1	9638
133.642	3.0221	0.127043	23.7879	4.45e-125	4.04e-124	UP	CD96	10225
59.4385	3.65675	0.153736	23.786	4.66e-125	4.23e-124	UP	KCNS1	3787
28.1637	3.82086	0.160666	23.7814	5.2e-125	4.71e-124	UP	ENKUR	219670
1373.27	1.15932	0.0487503	23.7808	5.28e-125	4.78e-124	NONE	ATP6V1D	51382
3827.44	-2.19651	0.0923791	-23.7771	5.76e-125	5.21e-124	DOWN	SYTL1	84958
1554.27	1.95543	0.0822529	23.7734	6.3e-125	5.7e-124	NONE	ZNF703	80139
1331.15	-1.25749	0.0529012	-23.7705	6.74e-125	6.09e-124	NONE	ZXDC	79364
150.482	3.2657	0.137439	23.7611	8.43e-125	7.62e-124	UP	ATG9B	285973
1495.75	2.74886	0.115719	23.7546	9.85e-125	8.9e-124	UP	EVPL	2125
302.754	-1.73625	0.0731231	-23.7442	1.26e-124	1.14e-123	NONE	FAHD2B	151313
144.696	7.37217	0.310511	23.742	1.33e-124	1.2e-123	UP	SPINK4	27290
36.1014	3.35963	0.141531	23.7377	1.47e-124	1.33e-123	UP	BCAN	63827
402.789	-2.84726	0.119949	-23.7373	1.48e-124	1.34e-123	DOWN	SHC3	53358
2906.26	1.19222	0.0502546	23.7235	2.06e-124	1.86e-123	NONE	POR	5447
1114.06	3.77558	0.15922	23.7131	2.64e-124	2.38e-123	UP	F5	2153
40.8123	4.86797	0.205298	23.7117	2.73e-124	2.46e-123	UP	HOXB8	3218
1201.38	-1.38844	0.0585557	-23.7114	2.75e-124	2.47e-123	NONE	ZNF302	55900
[truncated: 15,963 more rows]
